# Supplementary material for: Cu2O-catalyzed cascade phosphinylation/cyclization of 2′-aminochalcones for the synthesis of hemi-indigo derivatives
Source: Royal Society of Chemistry journal article supplement (doi:10.1039/d4ob00594e), 2024-01-01

# Electronic Supplementary Information

## **Cu<sub>2</sub>O-catalyzed cascade phosphinylation/cyclization of 2'- aminochalcones for the synthesis of hemi-indigo derivatives**

Xian Liu,<sup>a</sup> Liqiang Hao,<sup>a</sup> Yangyang Wang,<sup>a</sup> Xiao Yu,<sup>a</sup> Zhaoziyuan Yang,<sup>a</sup> Yiping Liu,<sup>\*b</sup> and Yafei Ji<sup>\*a</sup>

<sup>a</sup>Engineering Research Center of Pharmaceutical Process Chemistry, Ministry of Education;  
School of Pharmacy, East China University of Science and Technology, 130 Meilong Road,  
Shanghai 200237, P. R. China

E-mail: jyf@ecust.edu.cn (Ji).

<sup>b</sup>School of Pharmacy, Chongqing Medical and Pharmaceutical College, Chongqing 401331, P. R.  
China

E-mail: 10792@cqmpc.edu.cn

| <b>Table of contents:</b>                | <b>Page</b> |
|------------------------------------------|-------------|
| <b>1. General Experiment Information</b> | <b>2</b>    |
| <b>2. General Procedures</b>             | <b>2</b>    |
| <b>3. Characterization of Materials</b>  | <b>4</b>    |
| <b>4. Copies of NMR Spectra</b>          | <b>24</b>   |

## 1. General Experiment Information

All reagents were obtained from commercial sources and used as received without further purification unless otherwise stated. NMR spectra were recorded on a BrukerAvanceII 400 spectrometer and BrukerAvanceII 600 spectrometer in DMSO-*d*<sub>6</sub> or CDCl<sub>3</sub> with tetramethylsilane (TMS) as an internal standard; chemical shifts  $\delta$  were given in ppm and coupling constants *J* in Hz. HRMS were measured on a QSTAR Pulsar I LC/TOF MS mass spectrometer.

## 2. General Procedures

### 2.1 General procedure for Synthesis of 2'-amino Chalcones.

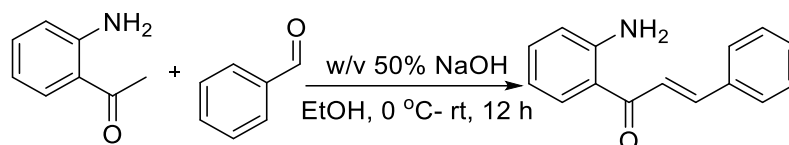

A round bottom flask containing a magnetic stirring bar was charged with 1-(2-aminophenyl)ethan-1-one (1 mmol, 1.0 equiv.) in ethanol and 50% w/v NaOH (5 mL). Then mixture was kept in 0 °C and corresponding benzaldehyde (1.1 mmol, 1.1 equiv.) was added. Then reaction mixture was stirred for 12 h. After the completion of the reaction (as monitored by TLC), water (15 mL) was added. The organic phase was extracted three times with 45 mL of ethyl acetate, dried over anhydrous sodium sulfate and filtered, and the solvent was evaporated under vacuum. Purification was performed by column chromatography on silica gel to obtain the desired products as a yellow solid.

### 2.2 General procedure for Synthesis of (Z)-2-((diphenylphosphoryl)(phenyl)methylene)indolin-3-one

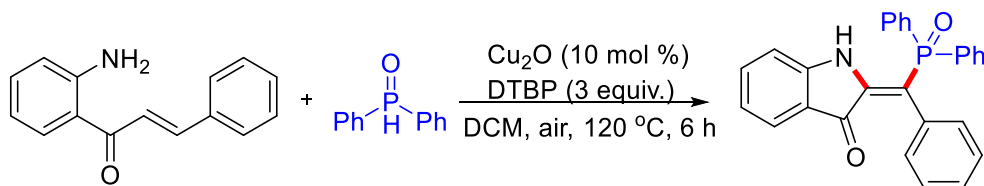

A mixture of 2'-amino Chalcones (0.2 mmol, 1.0 equiv.), diphenylphosphine oxide (0.3 mmol, 1.5 equiv.), Cu<sub>2</sub>O (10 mol%) and DTBP (0.6 mmol, 3.0 equiv.) in DCM (2 mL) was stirred in sealed tubes at 120 °C for 6 h. After the completion of the reaction (TLC), H<sub>2</sub>O (10 mL) was added. The mixture was extracted with DCM (3×10 mL), dried over anhydrous sodium sulfate and filtered, and the combined organic layers were concentrated by a rotary evaporator. Purification was performed by column chromatography on silica gel to provide the desired products.

## 2.3 Single crystal structure of 4a

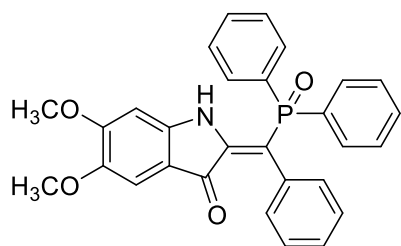

**4a**

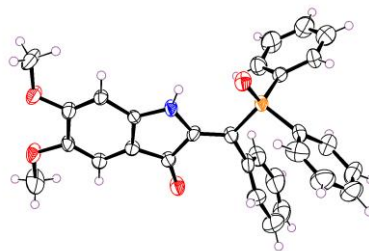

X-ray Single crystal structure of **4a**

|                                        |                                                                                                                                                                       |
|----------------------------------------|-----------------------------------------------------------------------------------------------------------------------------------------------------------------------|
| Empirical formula                      | $C_{29}H_{24}NO_4P$                                                                                                                                                   |
| Formula weight                         | 481.1443                                                                                                                                                              |
| Temperature                            | 294.00 K                                                                                                                                                              |
| Wavelength                             | 1.54178 Å                                                                                                                                                             |
| Crystal system                         | Monoclinic                                                                                                                                                            |
| Space group                            | $C2/c$                                                                                                                                                                |
| Unit cell dimensions                   | $a = 16.3847 (4) \text{ \AA}$ $\alpha = 90^\circ$<br>$b = 17.7511 (5) \text{ \AA}$ $\beta = 107.6320 (10)^\circ$<br>$c = 18.5322 (5) \text{ \AA}$ $\gamma = 90^\circ$ |
| Volume                                 | $5136.8 (2) \text{ \AA}^3$                                                                                                                                            |
| Z                                      | 8                                                                                                                                                                     |
| Density (calculated)                   | $1.245 \text{ Mg/m}^3$                                                                                                                                                |
| Absorption coefficient                 | $1.229 \text{ mm}^{-1}$                                                                                                                                               |
| F (000)                                | 2016                                                                                                                                                                  |
| Crystal size                           | $0.150 \times 0.090 \times 0.050 \text{ mm}^3$                                                                                                                        |
| Theta range for data collection        | $3.770$ to $68.430^\circ$                                                                                                                                             |
| Index ranges                           | $-19 \leq h \leq 19$ , $-20 \leq k \leq 21$ , $-22 \leq l \leq 21$                                                                                                    |
| Reflections collected                  | 58205                                                                                                                                                                 |
| Independent reflections                | 4667 [R(int) = 0.0563]                                                                                                                                                |
| Completeness to theta = $67.679^\circ$ | 98.9 %                                                                                                                                                                |
| Refinement method                      | Full-matrix least-squares on $F^2$                                                                                                                                    |
| Data / restraints / parameters         | 4667 / 187 / 354                                                                                                                                                      |

|                                      |                                       |
|--------------------------------------|---------------------------------------|
| Goodness-of-fit on $F^2$             | 1.095                                 |
| Final R indices [ $I > 2\sigma(I)$ ] | R1 = 0.0475, wR2 = 0.1345             |
| R indices (all data)                 | R1 = 0.0531, wR2 = 0.1447             |
| Extinction coefficient               | n/a                                   |
| Largest diff. peak and hole          | 0.410 and -0.335 e. $\text{\AA}^{-3}$ |

### 3. Characterization of Materials

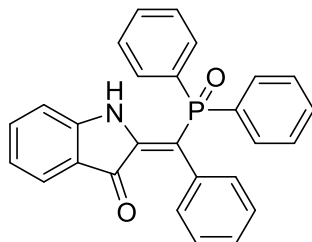

**(Z)-2-((diphenylphosphoryl)(phenyl)methylene)indolin-3-one (3a):** Compound **3a** was isolated as a red oil (64.1 mg, 76%) by a column chromatography on silica gel (eluents: petroleum ether/ethyl acetate = 10:1).  $^1\text{H}$  NMR (400 MHz, DMSO)  $\delta$  10.28 (s, 1H), 7.60 (dd,  $J = 8.5, 4.6$  Hz, 2H), 7.55 – 7.41 (m, 9H), 7.39 (d,  $J = 7.5$  Hz, 1H), 7.32 (d,  $J = 8.1$  Hz, 1H), 7.18 (t,  $J = 7.3$  Hz, 1H), 7.09 (t,  $J = 7.5$  Hz, 2H), 6.88 (t,  $J = 7.4$  Hz, 1H), 6.67 (d,  $J = 7.6$  Hz, 2H).  $^{13}\text{C}$  NMR (151 MHz, DMSO)  $\delta$  185.35 (d,  $J = 11.6$  Hz), 185.27 (d,  $J = 11.6$  Hz), 153.10, 143.31, 137.59, 133.72 (d,  $J = 6.3$  Hz), 133.68 (d,  $J = 6.3$  Hz), 132.85 (d,  $J = 1.8$  Hz), 132.84 (d,  $J = 1.8$  Hz), 132.42 (d,  $J = 9.7$  Hz), 132.36 (d,  $J = 9.7$  Hz), 131.15 (d,  $J = 104.2$  Hz), 130.97 (d,  $J = 4.2$  Hz), 130.94 (d,  $J = 4.2$  Hz), 130.46 (d,  $J = 104.2$  Hz), 129.04 (d,  $J = 11.6$  Hz), 128.96 (d,  $J = 11.6$  Hz), 128.42, 127.64 (d,  $J = 1.5$  Hz), 127.63 (d,  $J = 1.5$  Hz), 124.61, 120.52, 119.71 (d,  $J = 2.3$  Hz), 119.69 (d,  $J = 2.3$  Hz), 113.16, 111.78 (d,  $J = 90.1$  Hz), 111.18 (d,  $J = 90.1$  Hz).  $^{31}\text{P}$  NMR (243 MHz, DMSO)  $\delta$  31.76 (s). HRMS (EI):  $m/z$   $[M]^+$  calcd. for  $\text{C}_{27}\text{H}_{20}\text{NO}_2\text{P}$ : 421.1232. Found: 421.1234.

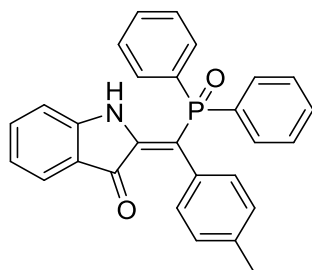

**(Z)-2-((diphenylphosphoryl)(phenyl)methylene)indolin-3-one (3b):** Compound **3b** was isolated as a red oil (69.7 mg, 80%) by a column chromatography on silica gel (eluents: petroleum ether/ethyl acetate = 10:1).  $^1\text{H}$  NMR (400 MHz, DMSO)  $\delta$  10.34 (s, 1H), 7.60 (dd,  $J = 8.5, 4.4$  Hz, 2H), 7.48 (dd,  $J = 15.0,$

7.7 Hz, 9H), 7.38 (d,  $J = 7.6$  Hz, 1H), 7.30 (d,  $J = 8.1$  Hz, 1H), 6.95 – 6.82 (m, 3H), 6.55 (d,  $J = 7.4$  Hz, 2H), 2.21 (s, 3H).  $^{13}\text{C}$  NMR (151 MHz, DMSO)  $\delta$  185.32 (d,  $J = 11.5$  Hz), 185.24 (d,  $J = 11.5$  Hz), 153.00, 143.41 (d,  $J = 1.5$  Hz), 143.40 (d,  $J = 1.5$  Hz), 137.52, 136.86 (d,  $J = 2.1$  Hz), 136.85 (d,  $J = 2.1$  Hz), 132.82 (d,  $J = 2.7$  Hz), 132.81 (d,  $J = 2.7$  Hz), 132.45 (d,  $J = 9.7$  Hz), 132.39 (d,  $J = 9.7$  Hz), 131.21 (d,  $J = 104.5$  Hz), 130.91 (d,  $J = 4.2$  Hz), 130.89 (d,  $J = 4.2$  Hz), 130.52 (d,  $J = 104.5$  Hz), 130.47, 129.07, 129.02 (d,  $J = 12.1$  Hz), 128.94 (d,  $J = 12.1$  Hz), 124.57, 120.44, 119.73 (d,  $J = 2.4$  Hz), 119.71 (d,  $J = 2.4$  Hz), 113.09, 111.89 (d,  $J = 90.1$  Hz), 111.29 (d,  $J = 90.1$  Hz), 21.25.  $^{31}\text{P}$  NMR (243 MHz, DMSO)  $\delta$  31.66 (s). HRMS (EI):  $m/z$   $[\text{M}]^+$  calcd. for  $\text{C}_{28}\text{H}_{22}\text{NO}_2\text{P}$ : 435.1388. Found: 435.1390.

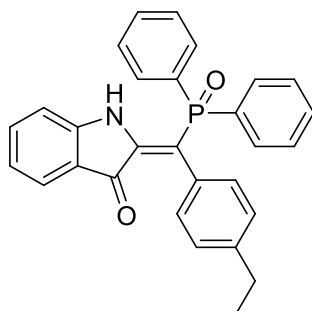

**(Z)-2-((diphenylphosphoryl)(4-ethylphenyl)methylene)indolin-3-one (3c):** Compound **3c** was isolated as a red oil (71.0 mg, 79%) by a column chromatography on silica gel (eluent: petroleum ether/ethyl acetate = 10:1).  $^1\text{H}$  NMR (400 MHz, DMSO)  $\delta$  10.37 (s, 1H), 7.62 (t,  $J = 6.4$  Hz, 2H), 7.57 – 7.45 (m, 9H), 7.42 (d,  $J = 7.5$  Hz, 1H), 7.33 (d,  $J = 8.1$  Hz, 1H), 6.95 (d,  $J = 7.8$  Hz, 2H), 6.89 (t,  $J = 7.4$  Hz, 1H), 6.60 (d,  $J = 7.2$  Hz, 2H), 2.53 (q,  $J = 7.5$  Hz, 2H), 1.14 (t,  $J = 7.5$  Hz, 3H).  $^{13}\text{C}$  NMR (151 MHz, DMSO)  $\delta$  185.32 (d,  $J = 11.6$  Hz), 185.25 (d,  $J = 11.6$  Hz), 153.04, 143.34, 143.23, 137.51, 132.79, 132.42 (d,  $J = 9.5$  Hz), 132.36 (d,  $J = 9.5$  Hz), 131.24 (d,  $J = 104.0$  Hz), 130.93 (d,  $J = 4.4$  Hz), 130.90 (d,  $J = 4.4$  Hz), 130.80 (d,  $J = 5.7$  Hz), 130.77 (d,  $J = 5.7$  Hz), 130.55 (d,  $J = 104.0$  Hz), 128.98 (d,  $J = 12.1$  Hz), 128.90 (d,  $J = 12.1$  Hz), 127.83, 124.58, 120.44, 119.74 (d,  $J = 2.9$  Hz), 119.73 (d,  $J = 2.9$  Hz), 113.10, 111.94 (d,  $J = 90.1$  Hz), 111.35 (d,  $J = 90.1$  Hz), 28.32, 16.03.  $^{31}\text{P}$  NMR (243 MHz, DMSO)  $\delta$  31.81 (s). HRMS (EI):  $m/z$   $[\text{M}]^+$  calcd. for  $\text{C}_{29}\text{H}_{24}\text{NO}_2\text{P}$ : 449.1545. Found: 449.1546.

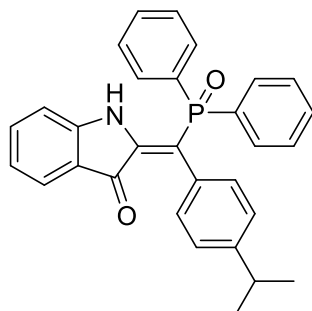

**(Z)-2-((diphenylphosphoryl)(4-isopropylphenyl)methylene)indolin-3-one (3d):** Compound **3d** was isolated as an orange solid (72.3 mg, 78%) by a column chromatography on silica gel (eluents: petroleum ether/ethyl acetate = 10:1), m.p. 235.1–235.7 °C. <sup>1</sup>H NMR (400 MHz, CDCl<sub>3</sub>) δ 10.23 (s, 1H), 7.57 (dd, *J* = 13.6, 6.6 Hz, 7H), 7.50 – 7.39 (m, 5H), 7.04 (d, *J* = 8.0 Hz, 2H), 6.96 (d, *J* = 8.1 Hz, 1H), 6.88 (t, *J* = 7.4 Hz, 1H), 6.68 (dd, *J* = 8.1, 1.6 Hz, 2H), 2.88 (dt, *J* = 13.8, 6.9 Hz, 1H), 1.25 (d, *J* = 6.9 Hz, 6H). <sup>13</sup>C NMR (151 MHz, CDCl<sub>3</sub>) δ 185.56 (d, *J* = 11.3 Hz), 185.49 (d, *J* = 11.3 Hz), 152.52, 148.29, 143.59, 136.90, 132.33 (d, *J* = 9.8 Hz), 132.27 (d, *J* = 9.8 Hz), 132.23, 130.58 (d, *J* = 105.2 Hz), 130.40 (d, *J* = 5.0 Hz), 130.36 (d, *J* = 5.0 Hz), 130.07 (d, *J* = 6.3 Hz), 130.02 (d, *J* = 6.3 Hz), 129.89 (d, *J* = 105.2 Hz), 128.29 (d, *J* = 12.2 Hz), 128.21 (d, *J* = 12.2 Hz), 126.31, 124.97, 120.13, 120.09, 111.90, 111.63 (d, *J* = 90.3 Hz), 111.30 (d, *J* = 90.3 Hz), 33.70, 23.93. <sup>31</sup>P NMR (243 MHz, DMSO) δ 31.94 (s). HRMS (EI): *m/z* [M]<sup>+</sup> calcd. for C<sub>30</sub>H<sub>26</sub>NO<sub>2</sub>P: 463.1701. Found: 463.1699.

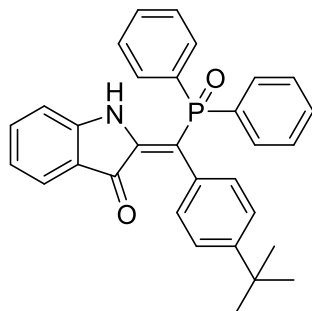

**(Z)-2-((4-(tert-butyl)phenyl)(diphenylphosphoryl)methylene)indolin-3-one (3e):** Compound **3e** was isolated as an orange solid (73.5 mg, 77%) by a column chromatography on silica gel (eluents: petroleum ether/ethyl acetate = 10:1), m.p. 217.3–217.9 °C. <sup>1</sup>H NMR (400 MHz, CDCl<sub>3</sub>) δ 10.19 (s, 1H), 7.55 (dd, *J* = 12.2, 7.7 Hz, 7H), 7.50 – 7.45 (m, 1H), 7.41 (td, *J* = 7.7, 2.8 Hz, 4H), 7.18 (d, *J* = 8.3 Hz, 2H), 6.97 (d, *J* = 8.1 Hz, 1H), 6.89 (t, *J* = 7.4 Hz, 1H), 6.67 (d, *J* = 6.9 Hz, 2H), 1.30 (s, 9H). <sup>13</sup>C NMR (151 MHz, CDCl<sub>3</sub>) δ 185.64 (d, *J* = 12.2 Hz), 185.56 (d, *J* = 12.2 Hz), 152.57, 150.60, 143.58, 136.93, 132.36 (d, *J* = 9.7 Hz), 132.29 (d, *J* = 9.7 Hz), 132.24 (d, *J* = 1.8 Hz), 132.23 (d, *J* = 1.8 Hz), 130.60 (d, *J* = 105.2 Hz), 130.10 (d, *J* = 4.1 Hz), 130.07 (d, *J* = 4.1 Hz), 129.91 (d, *J* = 105.2 Hz), 129.76 (d, *J* = 6.2 Hz), 129.72 (d, *J* = 6.2 Hz), 128.30 (d, *J* = 12.2 Hz), 128.22 (d, *J* = 12.2 Hz), 125.18, 125.02, 120.13, 111.92 (d, *J* = 90.6 Hz), 111.66, 111.32 (d, *J* = 90.6 Hz), 34.48, 31.30. <sup>31</sup>P NMR (243 MHz, CDCl<sub>3</sub>) δ 34.46 (s). HRMS (EI): *m/z* [M]<sup>+</sup> calcd. for C<sub>31</sub>H<sub>28</sub>NO<sub>2</sub>P: 477.1858. Found: 477.1856.

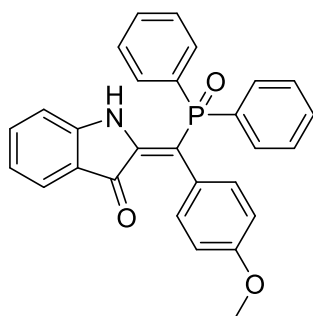

**(Z)-2-((diphenylphosphoryl)(4-methoxyphenyl)methylene)indolin-3-one (3f):** Compound **3f** was isolated as an orange oil (65.0 mg, 72%) by a column chromatography on silica gel (eluents: petroleum ether/ethyl acetate = 8:1).  $^1\text{H}$  NMR (400 MHz, DMSO)  $\delta$  10.33 (s, 1H), 7.62 (dd,  $J = 8.0, 4.7$  Hz, 2H), 7.55 – 7.46 (m, 9H), 7.41 (d,  $J = 7.5$  Hz, 1H), 7.32 (d,  $J = 8.1$  Hz, 1H), 6.89 (t,  $J = 7.4$  Hz, 1H), 6.69 (d,  $J = 8.6$  Hz, 2H), 6.59 (dd,  $J = 8.5, 1.3$  Hz, 2H), 3.69 (s, 3H).  $^{13}\text{C}$  NMR (151 MHz, DMSO)  $\delta$  185.31 (d,  $J = 11.8$  Hz), 185.23 (d,  $J = 11.8$  Hz), 158.99, 152.91, 143.59, 137.52, 132.83 (d,  $J = 1.8$  Hz), 132.82 (d,  $J = 1.8$  Hz), 132.44 (d,  $J = 9.4$  Hz), 132.38 (d,  $J = 9.4$  Hz), 132.24 (d,  $J = 4.2$  Hz), 132.21 (d,  $J = 4.2$  Hz), 131.28 (d,  $J = 104.0$  Hz), 130.59 (d,  $J = 104.0$  Hz), 129.06 (d,  $J = 12.1$  Hz), 128.98 (d,  $J = 12.1$  Hz), 125.30 (d,  $J = 6.3$  Hz), 125.26 (d,  $J = 6.3$  Hz), 124.58, 120.42, 119.76 (d,  $J = 2.1$  Hz), 119.75 (d,  $J = 2.1$  Hz), 113.99, 113.06, 111.62 (d,  $J = 67.6$  Hz), 111.02 (d,  $J = 67.6$  Hz), 55.44.  $^{31}\text{P}$  NMR (243 MHz, DMSO)  $\delta$  31.69 (s). HRMS (EI):  $m/z$   $[\text{M}]^+$  calcd. for  $\text{C}_{28}\text{H}_{22}\text{NO}_3\text{P}$ : 451.1337. Found: 451.1339.

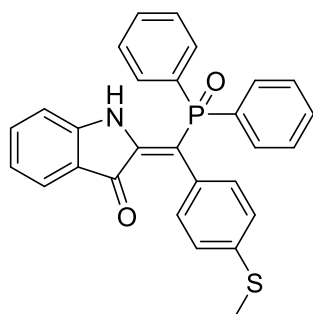

**(Z)-2-((diphenylphosphoryl)(4-(methylthio)phenyl)methylene)indolin-3-one (3g):** Compound **3g** was isolated as a red oil (65.5 mg, 70%) by a column chromatography on silica gel (eluents: petroleum ether/ethyl acetate = 10:1).  $^1\text{H}$  NMR (400 MHz, DMSO)  $\delta$  10.34 (s, 1H), 7.66 – 7.59 (m, 2H), 7.57 – 7.45 (m, 9H), 7.41 (d,  $J = 7.5$  Hz, 1H), 7.31 (d,  $J = 8.1$  Hz, 1H), 6.99 (d,  $J = 8.2$  Hz, 2H), 6.89 (t,  $J = 7.4$  Hz, 1H), 6.62 (d,  $J = 7.2$  Hz, 2H), 2.40 (s, 3H).  $^{13}\text{C}$  NMR (151 MHz, DMSO)  $\delta$  185.36 (d,  $J = 12.1$  Hz), 185.28 (d,  $J = 12.1$  Hz), 153.00, 143.58, 137.80, 137.58, 132.90 (d,  $J = 1.7$  Hz), 132.88 (d,  $J = 1.7$  Hz), 132.47 (d,  $J = 9.7$  Hz), 132.40 (d,  $J = 9.7$  Hz), 131.56 (d,  $J = 4.7$  Hz), 131.53 (d,  $J = 4.7$  Hz), 131.15 (d,  $J = 104.0$  Hz), 130.46 (d,  $J = 104.0$  Hz), 130.00 (d,  $J = 5.7$  Hz), 129.96 (d,  $J = 5.7$  Hz), 129.08 (d,  $J =$

12.1 Hz), 129.00 (d,  $J = 12.1$  Hz), 125.73, 124.62, 120.52, 119.71 (d,  $J = 2.3$  Hz), 119.69 (d,  $J = 2.3$  Hz), 113.12, 111.19 (d,  $J = 90.6$  Hz), 110.60 (d,  $J = 90.6$  Hz), 14.98.  $^{31}\text{P}$  NMR (243 MHz, DMSO)  $\delta$  31.62 (s). HRMS (EI):  $m/z$   $[\text{M}]^+$  calcd. for  $\text{C}_{28}\text{H}_{22}\text{NO}_2\text{PS}$ : 467.1109. Found: 467.1107.

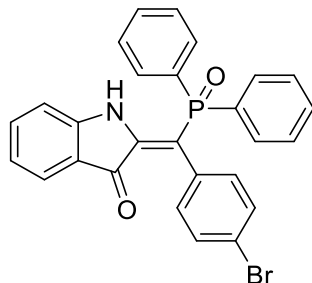

**(Z)-2-((4-bromophenyl)(diphenylphosphoryl)methylene)indolin-3-one (3h):** Compound **3h** was isolated as an orange solid (69.0 mg, 69%) by a column chromatography on silica gel (eluents: petroleum ether/ethyl acetate = 10:1), m.p. 249.7–250.4 °C.  $^1\text{H}$  NMR (400 MHz,  $\text{CDCl}_3$ )  $\delta$  10.36 (s, 1H), 7.70 (dt,  $J = 20.1, 10.2$  Hz, 6H), 7.66 – 7.50 (m, 6H), 7.41 (dd,  $J = 9.6, 5.8$  Hz, 2H), 7.12 – 6.96 (m, 2H), 6.77 – 6.65 (m, 2H).  $^{13}\text{C}$  NMR (151 MHz,  $\text{CDCl}_3$ )  $\delta$  185.52 (d,  $J = 11.3$  Hz), 185.45 (d,  $J = 11.3$  Hz), 152.51, 143.74, 137.16, 132.54 (d,  $J = 2.4$  Hz), 132.52 (d,  $J = 2.4$  Hz), 132.38 (d,  $J = 4.2$  Hz), 132.35 (d,  $J = 4.2$  Hz), 132.32 (d,  $J = 9.7$  Hz), 132.25 (d,  $J = 9.7$  Hz), 132.02 (d,  $J = 6.8$  Hz), 131.98 (d,  $J = 6.8$  Hz), 131.48, 130.14 (d,  $J = 105.4$  Hz), 129.44 (d,  $J = 105.4$  Hz), 128.52 (d,  $J = 11.9$  Hz), 128.44 (d,  $J = 11.9$  Hz), 125.08, 121.97 (d,  $J = 2.6$  Hz), 121.95 (d,  $J = 2.6$  Hz), 120.39, 119.92 (d,  $J = 2.4$  Hz), 119.91 (d,  $J = 2.4$  Hz), 111.70, 109.94 (d,  $J = 91.2$  Hz), 109.34 (d,  $J = 91.2$  Hz).  $^{31}\text{P}$  NMR (243 MHz,  $\text{CDCl}_3$ )  $\delta$  33.70 (s). HRMS (EI):  $m/z$   $[\text{M}]^+$  calcd. for  $\text{C}_{27}\text{H}_{19}\text{BrNO}_2\text{P}$ : 499.0337. Found: 499.0341.

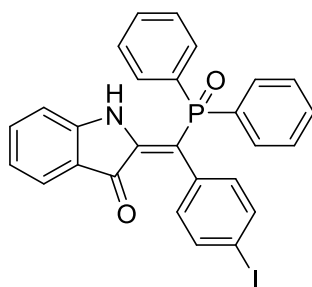

**(Z)-2-((diphenylphosphoryl)(4-iodophenyl)methylene)indolin-3-one (3i):** Compound **3i** was isolated as a red oil (78.8 mg, 72%) by a column chromatography on silica gel (eluents: petroleum ether/ethyl acetate = 10:1).  $^1\text{H}$  NMR (400 MHz, DMSO)  $\delta$  10.30 (s, 1H), 7.65 – 7.57 (m, 2H), 7.56 – 7.42 (m, 11H), 7.39 (d,  $J = 7.5$  Hz, 1H), 7.30 (d,  $J = 8.1$  Hz, 1H), 6.87 (t,  $J = 7.4$  Hz, 1H), 6.49 (d,  $J = 7.0$  Hz, 2H).  $^{13}\text{C}$  NMR (151 MHz, DMSO)  $\delta$  185.44 (d,  $J = 11.2$  Hz), 185.36 (d,  $J = 11.2$  Hz), 153.14, 143.42, 137.69, 137.26, 133.65 (d,  $J = 5.9$  Hz), 133.61 (d,  $J = 5.9$  Hz), 133.23 (d,  $J = 4.2$  Hz), 133.20 (d,  $J = 4.2$  Hz),



132.96, 132.45 (d,  $J = 9.7$  Hz), 132.39 (d,  $J = 9.7$  Hz), 130.96 (d,  $J = 104.5$  Hz), 130.27 (d,  $J = 104.5$  Hz), 129.14 (d,  $J = 12.2$  Hz), 129.06 (d,  $J = 12.2$  Hz), 124.66, 120.65, 119.63 (d,  $J = 2.3$  Hz), 119.62 (d,  $J = 2.3$  Hz), 113.22, 110.34 (d,  $J = 90.3$  Hz), 109.74 (d,  $J = 90.3$  Hz), 94.08 (d,  $J = 2.6$  Hz), 94.06 (d,  $J = 2.6$  Hz).  $^{31}\text{P}$  NMR (243 MHz, DMSO)  $\delta$  31.38 (s). HRMS (EI):  $m/z$   $[\text{M}]^+$  calcd. for  $\text{C}_{27}\text{H}_{19}\text{INO}_2\text{P}$ : 547.0198. Found: 547.0192.

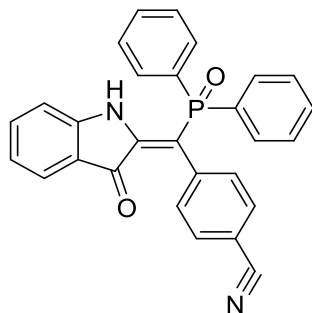

**(Z)-4-((diphenylphosphoryl)(3-oxoindolin-2-ylidene)methyl)benzonitrile (3j):** Compound **3j** was isolated as a red oil (60.7 mg, 68%) by a column chromatography on silica gel (eluents: petroleum ether/ethyl acetate = 10:1).  $^1\text{H}$  NMR (400 MHz, DMSO)  $\delta$  10.28 (s, 1H), 7.65 – 7.59 (m, 2H), 7.58 – 7.46 (m, 11H), 7.40 (d,  $J = 7.5$  Hz, 1H), 7.32 (d,  $J = 8.1$  Hz, 1H), 6.90 (dd,  $J = 13.9, 7.2$  Hz, 3H).  $^{13}\text{C}$  NMR (151 MHz, DMSO)  $\delta$  185.53 (d,  $J = 11.2$  Hz), 185.45 (d,  $J = 11.2$  Hz), 153.34, 143.46, 140.08 (d,  $J = 6.3$  Hz), 140.04 (d,  $J = 6.3$  Hz), 137.77, 133.04, 132.45 (d,  $J = 9.8$  Hz), 132.39 (d,  $J = 9.8$  Hz), 132.25, 132.17 (d,  $J = 4.1$  Hz), 132.14 (d,  $J = 4.1$  Hz), 130.82 (d,  $J = 104.5$  Hz), 130.13 (d,  $J = 104.5$  Hz), 129.21 (d,  $J = 11.8$  Hz), 129.13 (d,  $J = 11.8$  Hz), 124.74, 120.81, 119.57 (d,  $J = 1.8$  Hz), 119.55 (d,  $J = 1.8$  Hz), 119.30, 113.35, 110.19 (d,  $J = 2.0$  Hz), 110.18 (d,  $J = 2.0$  Hz), 109.57 (d,  $J = 90.1$  Hz), 108.98 (d,  $J = 90.1$  Hz).  $^{31}\text{P}$  NMR (243 MHz, DMSO)  $\delta$  31.38 (s). HRMS (EI):  $m/z$   $[\text{M}]^+$  calcd. for  $\text{C}_{28}\text{H}_{19}\text{N}_2\text{O}_2\text{P}$ : 481.1443. Found: 481.1446.

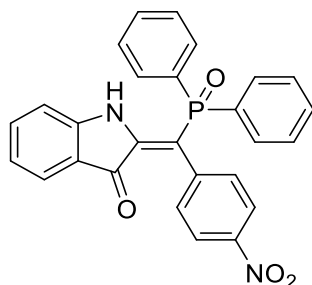

**(Z)-2-((diphenylphosphoryl)(4-nitrophenyl)methylene)indolin-3-one (3k):** Compound **3k** was isolated as a red oil (56.0 mg, 60%) by a column chromatography on silica gel (eluents: petroleum ether/ethyl acetate = 10:1).  $^1\text{H}$  NMR (400 MHz, DMSO)  $\delta$  10.28 (s, 1H), 7.98 (d,  $J = 8.7$  Hz, 2H), 7.67

– 7.61 (m, 2H), 7.58 – 7.49 (m, 9H), 7.42 (d,  $J = 7.5$  Hz, 1H), 7.36 (d,  $J = 8.1$  Hz, 1H), 7.01 (dd,  $J = 8.7$ , 1.5 Hz, 2H), 6.92 (t,  $J = 7.4$  Hz, 1H).  $^{13}\text{C}$  NMR (151 MHz, DMSO)  $\delta$  185.57 (d,  $J = 11.0$  Hz), 185.50 (d,  $J = 11.0$  Hz), 153.39, 146.79 (d,  $J = 2.3$  Hz), 146.77 (d,  $J = 2.3$  Hz), 143.45, 142.48 (d,  $J = 6.2$  Hz), 142.44 (d,  $J = 6.2$  Hz), 137.85, 133.09, 132.52 (d,  $J = 4.2$  Hz), 132.49 (d,  $J = 4.2$  Hz), 132.45 (d,  $J = 10.1$  Hz), 132.39 (d,  $J = 10.1$  Hz), 130.78 (d,  $J = 104.5$  Hz), 130.08 (d,  $J = 104.5$  Hz), 129.26 (d,  $J = 12.4$  Hz), 129.18 (d,  $J = 12.4$  Hz), 124.76, 123.46, 120.89, 119.50, 113.41, 109.14 (d,  $J = 90.1$  Hz), 108.54 (d,  $J = 90.1$  Hz).  $^{31}\text{P}$  NMR (243 MHz, DMSO)  $\delta$  31.13 (s). HRMS (EI):  $m/z$   $[\text{M}]^+$  calcd. for  $\text{C}_{27}\text{H}_{19}\text{N}_2\text{O}_4\text{P}$ : 466.1082. Found: 466.1085.

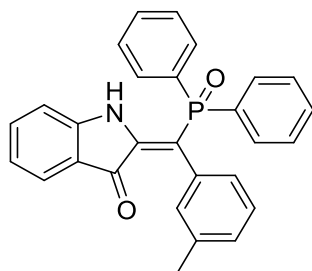

**(Z)-2-((diphenylphosphoryl)(m-tolyl)methylene)indolin-3-one (31):** Compound **31** was isolated as a red oil (65.3 mg, 75%) by a column chromatography on silica gel (eluents: petroleum ether/ethyl acetate = 10:1).  $^1\text{H}$  NMR (400 MHz, DMSO)  $\delta$  10.30 (s, 1H), 7.63 (dd,  $J = 8.4$ , 4.5 Hz, 2H), 7.57 – 7.45 (m, 9H), 7.42 (d,  $J = 7.6$  Hz, 1H), 7.34 (d,  $J = 8.1$  Hz, 1H), 7.05 – 6.98 (m, 2H), 6.91 (t,  $J = 7.4$  Hz, 1H), 6.57 (d,  $J = 5.1$  Hz, 1H), 6.37 (s, 1H), 2.04 (s, 3H).  $^{13}\text{C}$  NMR (151 MHz, DMSO)  $\delta$  185.33 (d,  $J = 12.1$  Hz), 185.25 (d,  $J = 12.1$  Hz), 153.08, 143.16, 137.57, 137.25, 133.46 (d,  $J = 5.6$  Hz), 133.42 (d,  $J = 5.6$  Hz), 132.81, 132.45 (d,  $J = 9.5$  Hz), 132.38 (d,  $J = 9.5$  Hz), 131.62 (d,  $J = 4.1$  Hz), 131.59 (d,  $J = 4.1$  Hz), 131.15 (d,  $J = 102.7$  Hz), 130.47 (d,  $J = 102.7$  Hz), 128.96 (d,  $J = 11.8$  Hz), 128.89 (d,  $J = 11.8$  Hz), 128.26 (d,  $J = 8.6$  Hz), 128.21 (d,  $J = 8.6$  Hz), 128.16 (d,  $J = 4.4$  Hz), 128.13 (d,  $J = 4.4$  Hz), 124.60, 120.48, 119.69, 113.14, 112.07 (d,  $J = 89.4$  Hz), 111.48 (d,  $J = 89.4$  Hz), 21.29.  $^{31}\text{P}$  NMR (243 MHz, DMSO)  $\delta$  31.77 (s). HRMS (EI):  $m/z$   $[\text{M}]^+$  calcd. for  $\text{C}_{28}\text{H}_{22}\text{NO}_2\text{P}$ : 435.1388. Found: 435.1391.

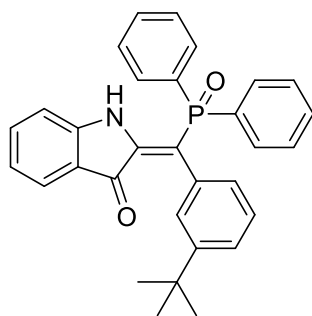

**(Z)-2-((3-(tert-butyl)phenyl)(diphenylphosphoryl)methylene)indolin-3-one (3m):** Compound **3m** was isolated as a red oil (70.7 mg, 74%) by a column chromatography on silica gel (eluents: petroleum ether/ethyl acetate = 10:1). <sup>1</sup>H NMR (400 MHz, DMSO) δ 10.37 (s, 1H), 7.61 (dd, *J* = 8.2, 4.6 Hz, 2H), 7.53 (d, *J* = 7.9 Hz, 1H), 7.48 (dd, *J* = 10.9, 5.9 Hz, 8H), 7.42 (d, *J* = 7.6 Hz, 1H), 7.33 (d, *J* = 8.1 Hz, 1H), 7.22 (d, *J* = 7.8 Hz, 1H), 7.08 (t, *J* = 7.7 Hz, 1H), 6.89 (t, *J* = 7.4 Hz, 1H), 6.62 (d, *J* = 7.4 Hz, 1H), 6.58 (s, 1H), 1.00 (s, 9H). <sup>13</sup>C NMR (151 MHz, DMSO) δ 185.32 (d, *J* = 11.9 Hz), 185.24 (d, *J* = 11.9 Hz), 153.05, 150.50, 143.09, 137.56, 132.98 (d, *J* = 5.1 Hz), 132.95 (d, *J* = 5.1 Hz), 132.75, 132.39 (d, *J* = 9.1 Hz), 132.33 (d, *J* = 9.1 Hz), 131.20 (d, *J* = 104.3 Hz), 130.51 (d, *J* = 104.3 Hz), 129.00 (d, *J* = 11.6 Hz), 128.93 (d, *J* = 11.6 Hz), 128.29, 128.16, 127.74, 124.62, 124.44, 120.44, 119.69, 113.09, 112.33 (d, *J* = 90.0 Hz), 111.73 (d, *J* = 90.0 Hz), 34.50, 31.25. <sup>31</sup>P NMR (243 MHz, DMSO) δ 31.83 (s). HRMS (EI): *m/z* [M]<sup>+</sup> calcd. for C<sub>31</sub>H<sub>28</sub>NO<sub>2</sub>P: 477.1858. Found: 477.1855.

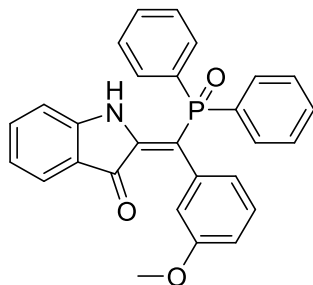

**(Z)-2-((diphenylphosphoryl)(3-methoxyphenyl)methylene)indolin-3-one (3n):** Compound **3n** was isolated as a red oil (64.1mg, 71%) by a column chromatography on silica gel (eluents: petroleum ether/ethyl acetate = 8:1). <sup>1</sup>H NMR (400 MHz, DMSO) δ 10.32 (s, 1H), 7.63 (dd, *J* = 8.5, 3.7 Hz, 2H), 7.58 – 7.46 (m, 9H), 7.42 (d, *J* = 7.5 Hz, 1H), 7.34 (d, *J* = 8.1 Hz, 1H), 7.04 (t, *J* = 7.9 Hz, 1H), 6.90 (t, *J* = 7.4 Hz, 1H), 6.76 (d, *J* = 8.3 Hz, 1H), 6.33 (d, *J* = 7.4 Hz, 1H), 6.18 (s, 1H), 3.44 (s, 3H). <sup>13</sup>C NMR (151 MHz, DMSO) δ 185.27 (d, *J* = 11.3 Hz), 185.19 (d, *J* = 11.3 Hz), 159.28, 153.10, 143.27, 137.57, 134.95 (d, *J* = 5.7 Hz), 134.91 (d, *J* = 5.7 Hz), 132.84, 132.44 (d, *J* = 9.5 Hz), 132.37 (d, *J* = 9.5 Hz), 131.15 (d, *J* = 104.2 Hz), 130.46 (d, *J* = 104.2 Hz), 129.45, 129.02 (d, *J* = 11.8 Hz), 128.95 (d, *J* = 11.8 Hz), 124.62, 123.43 (d, *J* = 4.5 Hz), 123.40 (d, *J* = 4.5 Hz), 120.51, 119.69, 116.21 (d, *J* = 4.2 Hz), 116.18 (d, *J* = 4.2 Hz), 113.59, 113.14, 111.47 (d, *J* = 90.1 Hz), 110.87 (d, *J* = 90.1 Hz), 55.11. <sup>31</sup>P NMR (243 MHz, DMSO) δ 31.71 (s). HRMS (EI): *m/z* [M]<sup>+</sup> calcd. for C<sub>28</sub>H<sub>22</sub>NO<sub>3</sub>P: 451.1337. Found: 451.1335.

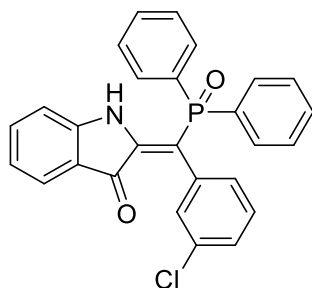

**(Z)-2-((3-chlorophenyl)(diphenylphosphoryl)methylene)indolin-3-one (3o):** Compound **3o** was isolated as a red oil (59.3 mg, 65%) by a column chromatography on silica gel (eluents: petroleum ether/ethyl acetate = 10:1). <sup>1</sup>H NMR (400 MHz, DMSO) δ 10.27 (s, 1H), 7.69 – 7.61 (m, 2H), 7.53 (dd, *J* = 14.5, 8.8 Hz, 9H), 7.43 (d, *J* = 7.5 Hz, 1H), 7.34 (d, *J* = 8.1 Hz, 1H), 7.25 (d, *J* = 8.0 Hz, 1H), 7.14 (t, *J* = 7.9 Hz, 1H), 6.91 (t, *J* = 7.4 Hz, 1H), 6.70 (d, *J* = 7.6 Hz, 1H), 6.67 (s, 1H). <sup>13</sup>C NMR (151 MHz, DMSO) δ 185.45 (d, *J* = 11.3 Hz), 185.38 (d, *J* = 11.3 Hz), 153.22, 143.58, 137.69, 136.19 (d, *J* = 6.2 Hz), 136.15 (d, *J* = 6.2 Hz), 132.99 (d, *J* = 1.7 Hz), 132.98 (d, *J* = 1.7 Hz), 132.94, 132.45 (d, *J* = 9.8 Hz), 132.39 (d, *J* = 9.8 Hz), 130.90 (d, *J* = 105.2 Hz), 130.82 (d, *J* = 4.2 Hz), 130.79 (d, *J* = 4.2 Hz), 130.20 (d, *J* = 105.2 Hz), 130.16, 129.80 (d, *J* = 4.1 Hz), 129.78 (d, *J* = 4.1 Hz), 129.13 (d, *J* = 12.1 Hz), 129.05 (d, *J* = 12.1 Hz), 127.50, 124.70, 120.69, 119.64 (d, *J* = 2.3 Hz), 119.63 (d, *J* = 2.3 Hz), 113.26, 109.63 (d, *J* = 90.4 Hz), 109.04 (d, *J* = 90.4 Hz). <sup>31</sup>P NMR (243 MHz, DMSO) δ 31.75 (s). HRMS (EI): *m/z* [M]<sup>+</sup> calcd. for C<sub>27</sub>H<sub>19</sub>ClNO<sub>2</sub>P: 455.0842. Found: 455.0839.

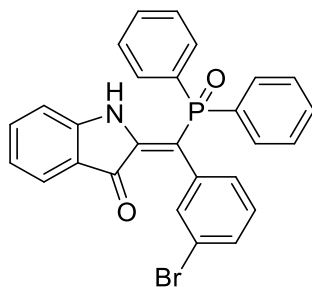

**(Z)-2-((3-bromophenyl)(diphenylphosphoryl)methylene)indolin-3-one (3p):** Compound **3p** was isolated as a red oil (68.0 mg, 68%) by a column chromatography on silica gel (eluents: petroleum ether/ethyl acetate = 10:1). <sup>1</sup>H NMR (400 MHz, DMSO) δ 10.25 (s, 1H), 7.63 (dd, *J* = 8.6, 4.5 Hz, 2H), 7.58 – 7.44 (m, 9H), 7.41 (d, *J* = 7.5 Hz, 1H), 7.39 – 7.31 (m, 2H), 7.07 (t, *J* = 8.1 Hz, 1H), 6.90 (t, *J* = 7.4 Hz, 1H), 6.75 (dd, *J* = 4.1, 2.1 Hz, 2H). <sup>13</sup>C NMR (151 MHz, DMSO) δ 185.46 (d, *J* = 11.6 Hz), 185.39 (d, *J* = 11.6 Hz), 153.22, 143.55, 137.70, 136.42 (d, *J* = 6.3 Hz), 136.38 (d, *J* = 6.3 Hz), 133.61 (d, *J* = 4.7 Hz), 133.58 (d, *J* = 4.7 Hz), 133.00 (d, *J* = 1.8 Hz), 132.99 (d, *J* = 1.8 Hz), 132.45 (d, *J* = 9.8 Hz), 132.39 (d, *J* = 9.8 Hz), 131.57 (d, *J* = 105.2 Hz), 130.87 (d, *J* = 105.2 Hz), 130.40 (d, *J* = 5.4 Hz),

130.36 (d,  $J = 5.4$  Hz), 130.23 (d,  $J = 4.4$  Hz), 130.20 (d,  $J = 4.4$  Hz), 129.13 (d,  $J = 12.1$  Hz), 129.05 (d,  $J = 12.1$  Hz), 124.70, 121.46, 120.69, 119.63 (d,  $J = 2.4$  Hz), 119.62 (d,  $J = 2.4$  Hz), 113.27, 109.60 (d,  $J = 90.4$  Hz), 109.00 (d,  $J = 90.4$  Hz).  $^{31}\text{P}$  NMR (243 MHz, DMSO)  $\delta$  31.76 (s). HRMS (EI):  $m/z$   $[\text{M}]^+$  calcd. for  $\text{C}_{27}\text{H}_{19}\text{BrNO}_2\text{P}$ : 499.0337. Found: 499.0331.

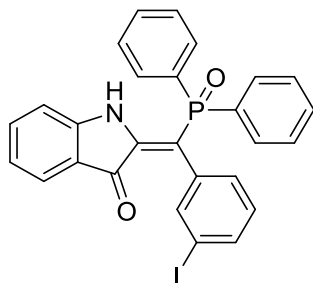

**(Z)-2-((diphenylphosphoryl)(3-iodophenyl)methylene)indolin-3-one (3q):** Compound **3q** was isolated as a red oil (76.6 mg, 70%) by a column chromatography on silica gel (eluent: petroleum ether/ethyl acetate = 10:1).  $^1\text{H}$  NMR (400 MHz, DMSO)  $\delta$  10.28 (s, 1H), 7.66 – 7.58 (m, 2H), 7.56 – 7.44 (m, 10H), 7.41 (d,  $J = 7.5$  Hz, 1H), 7.31 (d,  $J = 8.1$  Hz, 1H), 6.96 – 6.85 (m, 3H), 6.81 (d,  $J = 7.5$  Hz, 1H).  $^{13}\text{C}$  NMR (151 MHz, DMSO)  $\delta$  185.48 (d,  $J = 11.8$  Hz), 185.40 (d,  $J = 11.8$  Hz), 153.20, 143.45, 139.44 (d,  $J = 4.1$  Hz), 139.41 (d,  $J = 4.1$  Hz), 137.66, 136.21, 136.17, 132.99, 132.46 (d,  $J = 9.7$  Hz), 132.40 (d,  $J = 9.7$  Hz), 130.84 (d,  $J = 104.3$  Hz), 130.67 (d,  $J = 4.4$  Hz), 130.64 (d,  $J = 4.4$  Hz), 130.37, 130.15 (d,  $J = 104.3$  Hz), 129.10 (d,  $J = 11.8$  Hz), 129.02 (d,  $J = 11.8$  Hz), 124.70, 120.67, 119.65 (d,  $J = 2.0$  Hz), 119.64 (d,  $J = 2.0$  Hz), 113.24, 109.80 (d,  $J = 90.3$  Hz), 109.20 (d,  $J = 90.3$  Hz), 94.47.  $^{31}\text{P}$  NMR (243 MHz, DMSO)  $\delta$  31.79 (s). HRMS (EI):  $m/z$   $[\text{M}]^+$  calcd. for  $\text{C}_{27}\text{H}_{19}\text{INO}_2\text{P}$ : 547.0198. Found: 547.0200.

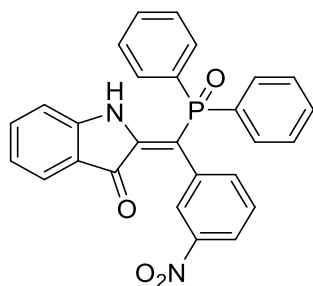

**(Z)-2-((diphenylphosphoryl)(3-nitrophenyl)methylene)indolin-3-one (3r):** Compound **3r** was isolated as a red oil (52.2 mg, 56%) by a column chromatography on silica gel (eluent: petroleum ether/ethyl acetate = 10:1).  $^1\text{H}$  NMR (400 MHz, DMSO)  $\delta$  10.27 (s, 1H), 8.06 (d,  $J = 8.1$  Hz, 1H), 7.65 (dd,  $J = 10.0, 4.6$  Hz, 2H), 7.60 – 7.47 (m, 9H), 7.43 (dd,  $J = 10.7, 4.9$  Hz, 3H), 7.36 (d,  $J = 8.1$  Hz, 1H), 7.27 (d,  $J = 7.6$  Hz, 1H), 6.93 (t,  $J = 7.4$  Hz, 1H).  $^{13}\text{C}$  NMR (151 MHz, DMSO)  $\delta$  185.63 (d,  $J = 11.3$

Hz), 185.56 (d,  $J = 11.3$  Hz), 153.33, 147.76, 143.90, 138.38 (d,  $J = 4.5$  Hz), 138.35 (d,  $J = 4.5$  Hz), 137.81, 136.19 (d,  $J = 6.6$  Hz), 136.14 (d,  $J = 6.6$  Hz), 133.07, 132.49 (d,  $J = 10.0$  Hz), 132.43 (d,  $J = 10.0$  Hz), 130.73 (d,  $J = 105.1$  Hz), 130.03 (d,  $J = 105.1$  Hz), 129.96, 129.24 (d,  $J = 12.2$  Hz), 129.16 (d,  $J = 12.2$  Hz), 125.78 (d,  $J = 4.1$  Hz), 125.76 (d,  $J = 4.1$  Hz), 124.77, 122.47, 120.84, 119.61 (d,  $J = 2.3$  Hz), 119.59 (d,  $J = 2.3$  Hz), 113.35, 108.36 (d,  $J = 90.8$  Hz), 107.76 (d,  $J = 90.8$  Hz).  $^{31}\text{P}$  NMR (243 MHz, DMSO)  $\delta$  31.61 (s). HRMS (EI):  $m/z$   $[\text{M}]^+$  calcd. for  $\text{C}_{27}\text{H}_{19}\text{N}_2\text{O}_4\text{P}$ : 466.1082. Found: 466.1086.

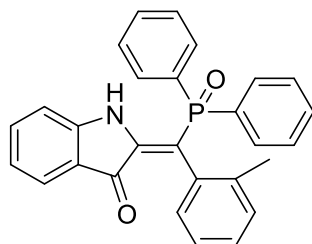

**(Z)-2-((diphenylphosphoryl)(o-tolyl)methylene)indolin-3-one (3s):** Compound **3s** was isolated as a red oil (63.6 mg, 73%) by a column chromatography on silica gel (eluents: petroleum ether/ethyl acetate = 10:1).  $^1\text{H}$  NMR (400 MHz, DMSO)  $\delta$  10.30 (s, 1H), 7.74 – 7.63 (m, 3H), 7.56 (dt,  $J = 15.3, 5.1$  Hz, 4H), 7.41 (d,  $J = 7.6$  Hz, 1H), 7.34 (t,  $J = 8.9$  Hz, 3H), 7.13 (dd,  $J = 18.6, 9.8$  Hz, 3H), 6.97 (dd,  $J = 17.4, 7.8$  Hz, 2H), 6.89 (t,  $J = 7.4$  Hz, 1H), 6.64 (d,  $J = 7.4$  Hz, 1H), 1.44 (s, 3H).  $^{13}\text{C}$  NMR (151 MHz, DMSO)  $\delta$  185.43 (d,  $J = 11.8$  Hz), 185.35 (d,  $J = 11.8$  Hz), 153.43, 143.06, 138.48 (d,  $J = 4.5$  Hz), 138.45 (d,  $J = 4.5$  Hz), 137.64, 133.30 (d,  $J = 103.0$  Hz), 133.0 (d,  $J = 1.8$  Hz), 132.99 (d,  $J = 1.8$  Hz), 132.95 (d,  $J = 4.5$  Hz), 132.92 (d,  $J = 4.5$  Hz), 132.72, 132.61 (d,  $J = 103.0$  Hz), 132.53 (d,  $J = 8.5$  Hz), 132.47 (d,  $J = 8.5$  Hz), 132.03 (d,  $J = 10.7$  Hz), 131.96 (d,  $J = 10.7$  Hz), 130.17, 129.88 (d,  $J = 3.8$  Hz), 129.86 (d,  $J = 3.8$  Hz), 129.56 (d,  $J = 11.6$  Hz), 129.49 (d,  $J = 11.6$  Hz), 128.40 (d,  $J = 104.0$  Hz), 128.35 (d,  $J = 11.3$  Hz), 128.28 (d,  $J = 11.3$  Hz), 127.97 (d,  $J = 1.5$  Hz), 127.96 (d,  $J = 1.5$  Hz), 127.71 (d,  $J = 104.0$  Hz), 126.03, 124.62, 120.49, 119.45 (d,  $J = 2.3$  Hz), 119.43 (d,  $J = 2.3$  Hz), 113.28, 110.72 (d,  $J = 90.1$  Hz), 110.12 (d,  $J = 90.1$  Hz), 19.54.  $^{31}\text{P}$  NMR (243 MHz, DMSO)  $\delta$  30.21 (s). HRMS (EI):  $m/z$   $[\text{M}]^+$  calcd. for  $\text{C}_{28}\text{H}_{22}\text{NO}_2\text{P}$ : 435.1388. Found: 435.1390.

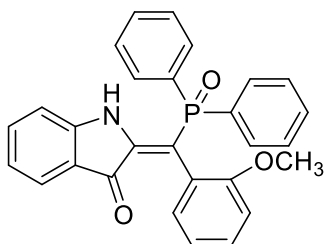

**(Z)-2-((diphenylphosphoryl)(2-methoxyphenyl)methylene)indolin-3-one (3t):** Compound **3t** was isolated as an orange oil (56.0 mg, 62%) by a column chromatography on silica gel (eluents: petroleum ether/ethyl acetate = 8:1). <sup>1</sup>H NMR (400 MHz, DMSO) δ 10.10 (s, 1H), 7.67 – 7.57 (m, 3H), 7.51 (t, *J* = 7.4 Hz, 4H), 7.40 (d, *J* = 7.6 Hz, 1H), 7.38 – 7.29 (m, 3H), 7.25 (dd, *J* = 11.2, 7.6 Hz, 2H), 7.20 – 7.13 (m, 1H), 6.88 (t, *J* = 7.4 Hz, 1H), 6.74 (d, *J* = 4.9 Hz, 2H), 6.63 (d, *J* = 8.3 Hz, 1H), 3.06 (s, 3H). <sup>13</sup>C NMR (151 MHz, DMSO) δ 185.26 (d, *J* = 12.2 Hz), 185.18 (d, *J* = 12.2 Hz), 157.68 (d, *J* = 4.8 Hz), 157.65 (d, *J* = 4.8 Hz), 153.25, 143.34, 137.52, 133.19 (d, *J* = 103.0 Hz), 132.71, 132.50 (d, *J* = 103.0 Hz), 132.31, 132.25, 132.07 (d, *J* = 10.7 Hz), 132.00 (d, *J* = 10.7 Hz), 131.27 (d, *J* = 4.2 Hz), 131.24 (d, *J* = 4.2 Hz), 130.20, 129.51, 129.31 (d, *J* = 11.6 Hz), 129.23 (d, *J* = 11.6 Hz), 128.08 (d, *J* = 11.9 Hz), 128.00 (d, *J* = 11.9 Hz), 124.53, 122.47 (d, *J* = 4.7 Hz), 122.44 (d, *J* = 4.7 Hz), 120.47, 119.70 (d, *J* = 2.0 Hz), 119.68 (d, *J* = 2.0 Hz), 113.22, 111.14, 108.94 (d, *J* = 92.9 Hz), 108.33 (d, *J* = 92.9 Hz), 54.97. <sup>31</sup>P NMR (243 MHz, DMSO) δ 30.63 (s). HRMS (EI): *m/z* [M]<sup>+</sup> calcd. for C<sub>28</sub>H<sub>22</sub>NO<sub>3</sub>P: 451.1337. Found: 451.1335.

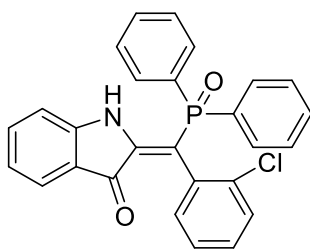

**(Z)-2-((2-chlorophenyl)(diphenylphosphoryl)methylene)indolin-3-one (3u):** Compound **3u** was isolated as a red oil (55.6 mg, 61%) by a column chromatography on silica gel (eluents: petroleum ether/ethyl acetate = 10:1). <sup>1</sup>H NMR (400 MHz, DMSO) δ 10.30 (s, 1H), 7.74 (dd, *J* = 12.5, 7.4 Hz, 2H), 7.67 (t, *J* = 7.3 Hz, 1H), 7.62 – 7.52 (m, 4H), 7.45 (d, *J* = 7.5 Hz, 1H), 7.40 – 7.32 (m, 3H), 7.30 – 7.20 (m, 4H), 7.17 (dd, *J* = 13.7, 6.2 Hz, 1H), 6.96 – 6.87 (m, 2H). <sup>13</sup>C NMR (151 MHz, DMSO) δ 185.31 (d, *J* = 12.0 Hz), 185.23 (d, *J* = 12.0 Hz), 153.52, 143.80, 137.78, 135.39 (d, *J* = 5.4 Hz), 135.36 (d, *J* = 5.4 Hz), 133.08, 133.02, 132.80 (d, *J* = 5.1 Hz), 132.77 (d, *J* = 5.1 Hz), 132.66, 132.51 (d, *J* = 8.9 Hz), 132.45 (d, *J* = 8.9 Hz), 132.39, 132.11 (d, *J* = 10.7 Hz), 132.04 (d, *J* = 10.7 Hz), 131.76 (d, *J* = 3.6 Hz), 131.73 (d, *J* = 3.6 Hz), 129.60 (d, *J* = 11.5 Hz), 129.53 (d, *J* = 11.5 Hz), 128.75 (d, *J* = 105.2 Hz), 128.34 (d, *J* = 11.9 Hz), 128.26 (d, *J* = 11.9 Hz), 128.06 (d, *J* = 105.2 Hz), 127.38, 124.73, 120.80, 119.38 (d, *J* = 2.1 Hz), 119.37 (d, *J* = 2.1 Hz), 113.43, 107.92 (d, *J* = 93.0 Hz), 107.31 (d, *J* = 93.0 Hz). <sup>31</sup>P NMR (243 MHz, DMSO) δ 30.26 (s). HRMS (EI): *m/z* [M]<sup>+</sup> calcd. for C<sub>27</sub>H<sub>19</sub>ClNO<sub>2</sub>P: 455.0842. Found: 455.0839.

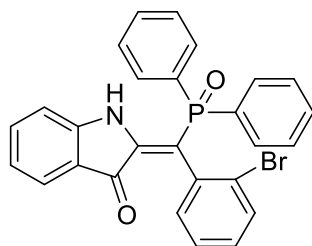

**(Z)-2-((2-bromophenyl)(diphenylphosphoryl)methylene)indolin-3-one (3v):** Compound **3v** was isolated as an orange oil (63.0 mg, 63%) by a column chromatography on silica gel (eluent: petroleum ether/ethyl acetate = 10:1). <sup>1</sup>H NMR (400 MHz, DMSO) δ 10.27 (s, 1H), 7.73 (dd, *J* = 12.5, 7.5 Hz, 2H), 7.67 (d, *J* = 6.9 Hz, 1H), 7.62 – 7.53 (m, 4H), 7.45 (d, *J* = 7.6 Hz, 1H), 7.36 (ddd, *J* = 10.6, 7.7, 4.0 Hz, 4H), 7.25 – 7.12 (m, 4H), 6.97 – 6.85 (m, 2H). <sup>13</sup>C NMR (151 MHz, DMSO) δ 185.20 (d, *J* = 11.6 Hz), 185.13 (d, *J* = 11.6 Hz), 153.51, 143.82, 137.79, 134.59 (d, *J* = 5.3 Hz), 134.55 (d, *J* = 5.3 Hz), 133.30 (d, *J* = 95.7 Hz), 133.03, 132.87, 132.68 (d, *J* = 8.3 Hz), 132.67 (d, *J* = 95.7 Hz), 132.62 (d, *J* = 8.3 Hz), 132.07, 132.00, 131.64 (d, *J* = 3.6 Hz), 131.61 (d, *J* = 3.6 Hz), 129.64, 129.56, 128.42 (d, *J* = 105.4 Hz), 128.29 (d, *J* = 11.5 Hz), 128.21 (d, *J* = 11.5 Hz), 127.97, 127.73 (d, *J* = 105.4 Hz), 126.84 (d, *J* = 5.6 Hz), 126.81 (d, *J* = 5.6 Hz), 124.75, 120.79, 119.38, 113.43, 109.71 (d, *J* = 93.0 Hz), 109.09 (d, *J* = 93.0 Hz). <sup>31</sup>P NMR (243 MHz, DMSO) δ 30.06 (s). HRMS (EI): *m/z* [M]<sup>+</sup> calcd. for C<sub>27</sub>H<sub>19</sub>BrNO<sub>2</sub>P: 499.0337. Found: 499.0336.

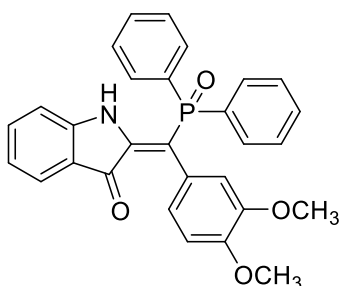

**(Z)-2-((3,4-dimethoxyphenyl)(diphenylphosphoryl)methylene)indolin-3-one (3x):** Compound **3x** was isolated as a red oil (67.4 mg, 70%) by a column chromatography on silica gel (eluent: petroleum ether/ethyl acetate = 6:1). <sup>1</sup>H NMR (400 MHz, DMSO) δ 10.39 (s, 1H), 7.62 (t, *J* = 6.8 Hz, 2H), 7.58 – 7.46 (m, 9H), 7.42 (d, *J* = 7.6 Hz, 1H), 7.30 (d, *J* = 8.1 Hz, 1H), 6.87 (t, *J* = 7.4 Hz, 1H), 6.75 (d, *J* = 8.3 Hz, 1H), 6.35 (d, *J* = 8.2 Hz, 1H), 6.11 (s, 1H), 3.71 (s, 3H), 3.29 (s, 3H). <sup>13</sup>C NMR (151 MHz, DMSO) δ 185.26 (d, *J* = 11.8 Hz), 185.19 (d, *J* = 11.8 Hz), 152.92, 148.61, 143.57, 137.47, 132.78, 132.51 (d, *J* = 9.5 Hz), 132.44 (d, *J* = 9.5 Hz), 131.32 (d, *J* = 103.9 Hz), 130.63 (d, *J* = 103.9 Hz), 129.02 (d, *J* = 11.6 Hz), 128.94 (d, *J* = 11.6 Hz), 125.44 (d, *J* = 6.2 Hz), 125.40 (d, *J* = 6.2 Hz), 124.61, 123.73 (d, *J* = 4.8 Hz), 123.69 (d, *J* = 4.8 Hz), 120.40, 119.79, 114.80 (d, *J* = 3.0 Hz), 114.78 (d, *J* = 3.0 Hz), 113.01, 111.81,



111.73 (d,  $J = 90.4$  Hz), 111.13 (d,  $J = 90.4$  Hz), 55.80, 55.35.  $^{31}\text{P}$  NMR (243 MHz, DMSO)  $\delta$  31.63 (s).

HRMS (EI):  $m/z$   $[\text{M}]^+$  calcd. for  $\text{C}_{29}\text{H}_{24}\text{NO}_4\text{P}$ : 481.1443. Found: 481.1446.

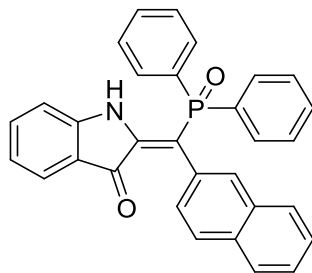

**(Z)-2-((diphenylphosphoryl)(naphthalen-2-yl)methylene)indolin-3-one (3y):** Compound **3y** was isolated as a red oil (52.8 mg, 56%) by a column chromatography on silica gel (eluent: petroleum ether/ethyl acetate = 10:1).  $^1\text{H}$  NMR (400 MHz, DMSO)  $\delta$  10.37 (s, 1H), 7.82 (d,  $J = 8.1$  Hz, 1H), 7.64 (d,  $J = 8.5$  Hz, 1H), 7.59 (t,  $J = 7.1$  Hz, 2H), 7.55 – 7.47 (m, 5H), 7.47 – 7.40 (m, 6H), 7.39 – 7.32 (m, 2H), 7.09 (s, 1H), 6.96 – 6.82 (m, 2H).  $^{13}\text{C}$  NMR (151 MHz, DMSO)  $\delta$  185.42 (d,  $J = 12.1$  Hz), 185.34 (d,  $J = 12.1$  Hz), 153.15, 143.61, 137.65, 133.06, 132.89, 132.46 (d,  $J = 10.0$  Hz), 132.40 (d,  $J = 10.0$  Hz), 131.45 (d,  $J = 5.6$  Hz), 131.41 (d,  $J = 5.6$  Hz), 131.19 (d,  $J = 104.3$  Hz), 130.50 (d,  $J = 104.3$  Hz), 129.83 (d,  $J = 5.3$  Hz), 129.80 (d,  $J = 5.3$  Hz), 129.49 (d,  $J = 3.8$  Hz), 129.46 (d,  $J = 3.8$  Hz), 129.07 (d,  $J = 12.1$  Hz), 128.99 (d,  $J = 12.1$  Hz), 128.02, 127.87, 127.72, 126.56, 126.38, 124.63, 120.58, 119.68 (d,  $J = 2.4$  Hz), 119.66 (d,  $J = 2.4$  Hz), 113.22, 111.67 (d,  $J = 90.1$  Hz), 111.08 (d,  $J = 90.1$  Hz).  $^{31}\text{P}$  NMR (243 MHz, DMSO)  $\delta$  31.64 (s). HRMS (EI):  $m/z$   $[\text{M}]^+$  calcd. for  $\text{C}_{31}\text{H}_{22}\text{NO}_2\text{P}$ : 471.1388. Found: 471.1391.

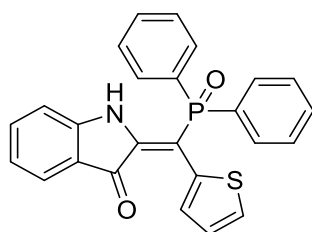

**(Z)-2-((diphenylphosphoryl)(thiophen-2-yl)methylene)indolin-3-one (3z):** Compound **3z** was isolated as a red oil (50.0 mg, 58%) by a column chromatography on silica gel (eluent: petroleum ether/ethyl acetate = 10:1).  $^1\text{H}$  NMR (400 MHz, DMSO)  $\delta$  10.46 (s, 1H), 7.62 (dd,  $J = 7.5, 4.5$  Hz, 2H), 7.55 – 7.46 (m, 9H), 7.42 (t,  $J = 6.5$  Hz, 2H), 7.32 (d,  $J = 8.1$  Hz, 1H), 6.91 (t,  $J = 7.4$  Hz, 1H), 6.87 – 6.82 (m, 1H), 6.30 (d,  $J = 2.7$  Hz, 1H).  $^{13}\text{C}$  NMR (151 MHz, DMSO)  $\delta$  184.91 (d,  $J = 11.0$  Hz), 184.84 (d,  $J = 11.0$  Hz), 152.63, 144.92 (d,  $J = 2.6$  Hz), 144.91 (d,  $J = 2.6$  Hz), 137.73, 134.39 (d,  $J = 6.2$  Hz), 134.35 (d,  $J = 6.2$  Hz), 133.00, 132.28 (d,  $J = 9.7$  Hz), 132.21 (d,  $J = 9.7$  Hz), 131.10 (d,  $J = 105.2$  Hz),

130.40 (d,  $J = 105.2$  Hz), 129.27 (d,  $J = 5.6$  Hz), 129.23 (d,  $J = 5.6$  Hz), 129.12 (d,  $J = 11.8$  Hz), 129.04 (d,  $J = 11.8$  Hz), 128.31 (d,  $J = 2.0$  Hz), 128.30 (d,  $J = 2.0$  Hz), 127.45, 124.77, 120.93, 119.51 (d,  $J = 2.3$  Hz), 119.49 (d,  $J = 2.3$  Hz), 113.23, 102.93 (d,  $J = 94.5$  Hz), 102.31 (d,  $J = 94.5$  Hz).  $^{31}\text{P}$  NMR (243 MHz, DMSO)  $\delta$  31.90 (s). HRMS (EI):  $m/z$   $[\text{M}]^+$  calcd. for  $\text{C}_{25}\text{H}_{18}\text{NO}_2\text{PS}$ : 427.0796. Found: 427.0793.

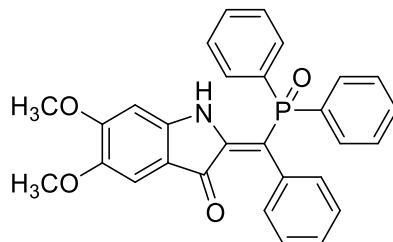

**(Z)-2-((diphenylphosphoryl)(phenyl)methylene)-5,6-dimethoxyindolin-3-one (4a):** Compound **4a** was isolated as a red solid (75.1 mg, 78%) by a column chromatography on silica gel (eluent: petroleum ether/ethyl acetate = 6:1), m.p. 152.6–153.3 °C.  $^1\text{H}$  NMR (400 MHz,  $\text{CDCl}_3$ )  $\delta$  9.97 (s, 1H), 7.57 (dd,  $J = 12.4, 7.5$  Hz, 6H), 7.46 – 7.39 (m, 4H), 7.24 (t,  $J = 7.3$  Hz, 1H), 7.15 (t,  $J = 7.5$  Hz, 2H), 6.96 (s, 1H), 6.75 (d,  $J = 7.7$  Hz, 2H), 6.48 (s, 1H), 3.98 (s, 3H), 3.82 (s, 3H).  $^{13}\text{C}$  NMR (151 MHz,  $\text{CDCl}_3$ )  $\delta$  183.59 (d,  $J = 11.8$  Hz), 183.51 (d,  $J = 11.8$  Hz), 157.91, 150.35, 145.04, 144.33, 132.98 (d,  $J = 6.2$  Hz), 132.94 (d,  $J = 6.2$  Hz), 132.36, 132.35 (d,  $J = 9.1$  Hz), 132.29 (d,  $J = 9.1$  Hz), 130.66 (d,  $J = 4.4$  Hz), 130.64 (d,  $J = 4.4$  Hz), 130.54 (d,  $J = 105.2$  Hz), 129.84 (d,  $J = 105.2$  Hz), 128.35 (d,  $J = 12.2$  Hz), 128.27 (d,  $J = 12.2$  Hz), 128.17, 127.47, 111.56 (d,  $J = 90.4$  Hz), 111.50 (d,  $J = 1.8$  Hz), 111.49 (d,  $J = 1.8$  Hz), 110.96 (d,  $J = 90.4$  Hz), 105.87, 94.70, 56.39, 56.29.  $^{31}\text{P}$  NMR (243 MHz,  $\text{CDCl}_3$ )  $\delta$  34.09 (s). HRMS (EI):  $m/z$   $[\text{M}]^+$  calcd. for  $\text{C}_{29}\text{H}_{24}\text{NO}_4\text{P}$ : 481.1443. Found: 481.1446.

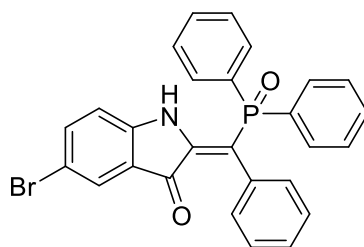

**(Z)-5-bromo-2-((diphenylphosphoryl)(phenyl)methylene)indolin-3-one (4b):** Compound **4b** was isolated as a red oil (72.1 mg, 72%) by a column chromatography on silica gel (eluent: petroleum ether/ethyl acetate = 10:1).  $^1\text{H}$  NMR (400 MHz, DMSO)  $\delta$  10.43 (s, 1H), 7.69 (dd,  $J = 8.6, 2.0$  Hz, 1H), 7.63 (dd,  $J = 8.5, 4.9$  Hz, 2H), 7.54 – 7.44 (m, 9H), 7.37 (d,  $J = 8.6$  Hz, 1H), 7.20 (t,  $J = 7.3$  Hz, 1H), 7.12 (t,  $J = 7.5$  Hz, 2H), 6.69 (d,  $J = 7.8$  Hz, 2H).  $^{13}\text{C}$  NMR (151 MHz, DMSO)  $\delta$  184.08 (d,  $J = 11.6$  Hz), 184.00 (d,  $J = 11.6$  Hz), 152.03, 142.97, 139.56, 133.53 (d,  $J = 5.6$  Hz), 133.50 (d,  $J = 5.6$  Hz),

132.92, 132.45 (d,  $J = 9.5$  Hz), 132.39 (d,  $J = 9.5$  Hz), 130.96 (d,  $J = 104.3$  Hz), 130.82 (d,  $J = 4.7$  Hz), 130.79 (d,  $J = 4.7$  Hz), 130.27 (d,  $J = 104.3$  Hz), 129.06 (d,  $J = 16.3$  Hz), 128.98 (d,  $J = 16.3$  Hz), 128.47, 127.76, 126.66, 121.45 (d,  $J = 2.4$  Hz), 121.44 (d,  $J = 2.4$  Hz), 115.53, 113.20 (d,  $J = 89.7$  Hz), 112.61 (d,  $J = 89.7$  Hz), 111.99.  $^{31}\text{P}$  NMR (243 MHz, DMSO)  $\delta$  31.52 (s). HRMS (EI):  $m/z$   $[\text{M}]^+$  calcd. for  $\text{C}_{27}\text{H}_{19}\text{BrNO}_2\text{P}$ : 499.0337. Found: 499.0333.

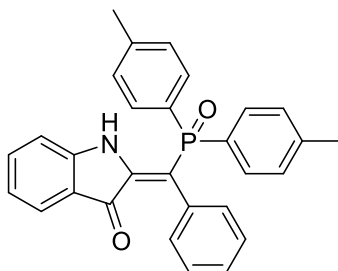

**(Z)-2-((di-p-tolylphosphoryl)(phenyl)methylene)indolin-3-one (4d):** Compound **4d** was isolated as an orange oil (74.6 mg, 83%) by a column chromatography on silica gel (eluents: petroleum ether/ethyl acetate = 10:1).  $^1\text{H}$  NMR (400 MHz, DMSO)  $\delta$  10.54 (s, 1H), 7.49 – 7.37 (m, 6H), 7.28 (dd,  $J = 14.0$ , 7.7 Hz, 5H), 7.23 – 7.17 (m, 1H), 7.12 (t,  $J = 7.3$  Hz, 2H), 6.85 (t,  $J = 7.3$  Hz, 1H), 6.76 (d,  $J = 7.3$  Hz, 2H), 2.32 (s, 6H).  $^{13}\text{C}$  NMR (151 MHz, DMSO)  $\delta$  185.41 (d,  $J = 11.6$  Hz), 185.34 (d,  $J = 11.6$  Hz), 153.12, 143.17, 142.89, 137.43, 133.89 (d,  $J = 4.7$  Hz), 133.86 (d,  $J = 4.7$  Hz), 132.52 (d,  $J = 9.7$  Hz), 132.46 (d,  $J = 9.7$  Hz), 131.03, 129.57 (d,  $J = 12.1$  Hz), 129.49 (d,  $J = 12.1$  Hz), 128.41, 128.13 (d,  $J = 106.5$  Hz), 127.60, 127.43 (d,  $J = 106.5$  Hz), 124.59, 120.37, 119.81, 113.05, 112.48 (d,  $J = 89.7$  Hz), 111.88 (d,  $J = 89.7$  Hz), 21.60.  $^{31}\text{P}$  NMR (243 MHz, DMSO)  $\delta$  31.78 (s). HRMS (EI):  $m/z$   $[\text{M}]^+$  calcd. for  $\text{C}_{29}\text{H}_{24}\text{NO}_2\text{P}$ : 449.1545. Found: 449.1547.

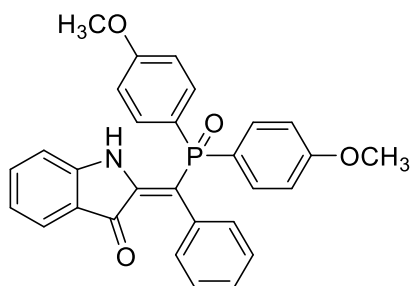

**(Z)-2-((bis(4-methoxyphenyl)phosphoryl)(phenyl)methylene)indolin-3-one (4e):** Compound **4e** was isolated as a red oil (78.0 mg, 81%) by a column chromatography on silica gel (eluents: petroleum ether/ethyl acetate = 6:1).  $^1\text{H}$  NMR (400 MHz, DMSO)  $\delta$  10.49 (s, 1H), 7.53 – 7.40 (m, 6H), 7.31 (d,  $J = 8.1$  Hz, 1H), 7.26 – 7.20 (m, 1H), 7.16 (t,  $J = 7.4$  Hz, 2H), 7.04 (d,  $J = 7.2$  Hz, 4H), 6.87 (t,  $J = 7.4$  Hz, 1H), 6.76 (d,  $J = 7.5$  Hz, 2H), 3.81 (s, 6H).  $^{13}\text{C}$  NMR (151 MHz, DMSO)  $\delta$  185.47 (d,  $J = 11.6$  Hz),

185.39 (d,  $J = 11.6$  Hz), 162.73, 153.09, 142.78, 137.42, 134.43 (d,  $J = 10.9$  Hz), 134.36 (d,  $J = 10.9$  Hz), 134.09 (d,  $J = 5.7$  Hz), 134.05 (d,  $J = 5.7$  Hz), 130.97 (d,  $J = 3.8$  Hz), 130.94 (d,  $J = 3.8$  Hz), 128.40, 127.57, 124.56, 122.41 (d,  $J = 111.0$  Hz), 121.67 (d,  $J = 111.0$  Hz), 120.29, 119.82 (d,  $J = 1.7$  Hz), 119.81 (d,  $J = 1.7$  Hz), 114.56 (d,  $J = 13.1$  Hz), 114.47 (d,  $J = 13.1$  Hz), 113.19 (d,  $J = 90.4$  Hz), 113.00, 112.59 (d,  $J = 90.4$  Hz), 55.81.  $^{31}\text{P}$  NMR (243 MHz, DMSO)  $\delta$  31.42 (s). HRMS (EI):  $m/z$   $[\text{M}]^+$  calcd. for  $\text{C}_{25}\text{H}_{18}\text{NO}_2\text{PS}$ : 481.1443. Found: 481.1446.

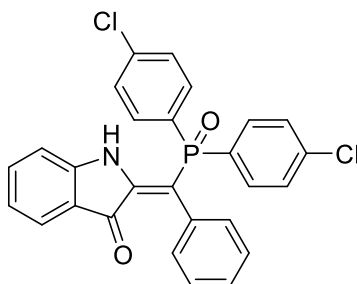

**(Z)-2-((bis(4-chlorophenyl)phosphoryl)(phenyl)methylene)indolin-3-one (4f):** Compound **4f** was isolated as a red oil (68.6 mg, 70%) by a column chromatography on silica gel (eluents: petroleum ether/ethyl acetate = 10:1).  $^1\text{H}$  NMR (400 MHz, DMSO)  $\delta$  10.20 (s, 1H), 7.60 – 7.43 (m, 9H), 7.41 (d,  $J = 7.5$  Hz, 1H), 7.33 (d,  $J = 8.0$  Hz, 1H), 7.24 – 7.18 (m, 1H), 7.14 (t,  $J = 7.3$  Hz, 2H), 6.90 (t,  $J = 7.4$  Hz, 1H), 6.73 (d,  $J = 7.2$  Hz, 2H).  $^{13}\text{C}$  NMR (151 MHz, DMSO)  $\delta$  185.35 (d,  $J = 12.1$  Hz), 185.27 (d,  $J = 12.1$  Hz), 153.15, 143.59, 138.14 (d,  $J = 2.4$  Hz), 138.12 (d,  $J = 2.4$  Hz), 137.62, 134.30 (d,  $J = 10.4$  Hz), 134.23 (d,  $J = 10.4$  Hz), 133.43 (d,  $J = 5.9$  Hz), 133.39 (d,  $J = 5.9$  Hz), 131.01 (d,  $J = 4.2$  Hz), 130.99 (d,  $J = 4.2$  Hz), 129.93 (d,  $J = 106.9$  Hz), 129.30 (d,  $J = 12.4$  Hz), 129.23 (d,  $J = 106.8$  Hz), 129.21 (d,  $J = 12.4$  Hz), 128.62, 127.79, 124.63, 120.68, 119.68, 113.27, 110.25 (d,  $J = 92.9$  Hz), 109.63 (d,  $J = 92.9$  Hz).  $^{31}\text{P}$  NMR (243 MHz, DMSO)  $\delta$  30.36 (s). HRMS (EI):  $m/z$   $[\text{M}]^+$  calcd. for  $\text{C}_{27}\text{H}_{18}\text{Cl}_2\text{NO}_2\text{P}$ : 489.0452. Found: 489.0448.

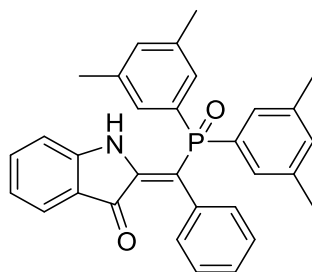

**(Z)-2-((bis(3,5-dimethylphenyl)phosphoryl)(phenyl)methylene)indolin-3-one (4g):** Compound **4g** was isolated as a red oil (78.3 mg, 82%) by a column chromatography on silica gel (eluents: petroleum ether/ethyl acetate = 10:1).  $^1\text{H}$  NMR (400 MHz, DMSO)  $\delta$  10.53 (s, 1H), 7.48 (t,  $J = 7.7$  Hz, 1H), 7.44

(d,  $J = 7.6$  Hz, 1H), 7.31 (d,  $J = 8.1$  Hz, 1H), 7.26 – 7.21 (m, 1H), 7.21 – 7.13 (m, 4H), 7.10 (d,  $J = 12.1$  Hz, 4H), 6.87 (t,  $J = 7.4$  Hz, 1H), 6.73 (d,  $J = 7.5$  Hz, 2H), 2.21 (s, 12H).  $^{13}\text{C}$  NMR (151 MHz, DMSO)  $\delta$  185.41 (d,  $J = 11.9$  Hz), 185.33 (d,  $J = 11.9$  Hz), 153.10, 143.19, 138.11 (d,  $J = 12.5$  Hz), 138.03 (d,  $J = 12.5$  Hz), 137.41, 134.16, 133.86 (d,  $J = 5.7$  Hz), 133.83 (d,  $J = 5.7$  Hz), 131.29 (d,  $J = 3.8$  Hz), 131.27 (d,  $J = 3.8$  Hz), 130.98 (d,  $J = 103.4$  Hz), 130.29 (d,  $J = 103.4$  Hz), 130.01 (d,  $J = 9.5$  Hz), 129.95 (d,  $J = 9.5$  Hz), 128.24, 127.51, 124.60, 120.32, 119.74, 113.04, 112.15 (d,  $J = 88.9$  Hz), 111.56 (d,  $J = 88.9$  Hz), 21.22.  $^{31}\text{P}$  NMR (243 MHz, DMSO)  $\delta$  32.84 – 31.67 (m). HRMS (EI):  $m/z$   $[\text{M}]^+$  calcd. for  $\text{C}_{31}\text{H}_{28}\text{NO}_2\text{P}$ : 477.1858. Found: 477.1861.

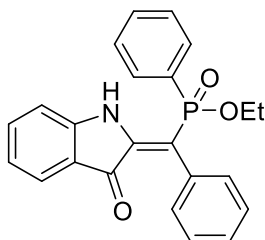

**ethyl (Z)-((3-oxoindolin-2-ylidene)(phenyl)methyl)(phenyl)phosphinate (4h):** Compound **4h** was isolated as a red oil (57.6 mg, 74%) by a column chromatography on silica gel (eluents: petroleum ether/ethyl acetate = 10:1).  $^1\text{H}$  NMR (400 MHz, DMSO)  $\delta$  10.18 (s, 1H), 7.59 – 7.35 (m, 9H), 7.24 – 7.16 (m, 3H), 6.90 (t,  $J = 7.3$  Hz, 2H), 4.23 – 4.13 (m, 2H), 1.31 (t,  $J = 6.8$  Hz, 3H).  $^{13}\text{C}$  NMR (151 MHz, DMSO)  $\delta$  185.59 (d,  $J = 13.7$  Hz), 185.50 (d,  $J = 13.7$  Hz), 153.06, 142.76 (d,  $J = 4.1$  Hz), 142.74 (d,  $J = 4.1$  Hz), 137.64, 133.81 (d,  $J = 5.3$  Hz), 133.77 (d,  $J = 5.3$  Hz), 132.97, 131.80 (d,  $J = 9.8$  Hz), 131.74 (d,  $J = 9.8$  Hz), 131.00 (d,  $J = 143.0$  Hz), 130.51 (d,  $J = 3.0$  Hz), 130.49 (d,  $J = 3.0$  Hz), 130.05 (d,  $J = 143.0$  Hz), 128.85 (d,  $J = 13.0$  Hz), 128.76 (d,  $J = 13.0$  Hz), 128.37, 127.59, 124.60, 120.60, 119.81 (d,  $J = 2.6$  Hz), 119.79 (d,  $J = 2.6$  Hz), 113.15, 110.71 (d,  $J = 119.4$  Hz), 109.92 (d,  $J = 119.4$  Hz), 61.55 (d,  $J = 5.6$  Hz), 61.51 (d,  $J = 5.6$  Hz), 16.75 (d,  $J = 6.6$  Hz), 16.71 (d,  $J = 6.6$  Hz).  $^{31}\text{P}$  NMR (243 MHz, DMSO)  $\delta$  32.88 (s). HRMS (EI):  $m/z$   $[\text{M}]^+$  calcd. for  $\text{C}_{23}\text{H}_{20}\text{NO}_3\text{P}$ : 389.1181. Found: 389.1183.

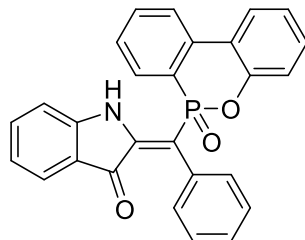

**(Z)-2-((6-oxidodibenzo[c,e][1,2]oxaphosphinin-6-yl)(phenyl)methylene)indolin-3-one (4i):** Compound **4i** was isolated as a red oil (45.3 mg, 52%) by a column chromatography on silica gel (eluents:

petroleum ether/ethyl acetate = 10:1).  $^1\text{H}$  NMR (400 MHz, DMSO)  $\delta$  10.21 (s, 1H), 8.17 – 8.10 (m, 1H), 8.02 (dd,  $J$  = 11.3, 7.0 Hz, 2H), 7.75 (t,  $J$  = 8.0 Hz, 1H), 7.59 (dd,  $J$  = 14.1, 6.4 Hz, 2H), 7.41 (dd,  $J$  = 14.1, 6.8 Hz, 3H), 7.30 – 7.17 (m, 3H), 7.09 – 6.89 (m, 5H).  $^{13}\text{C}$  NMR (151 MHz, DMSO)  $\delta$  185.81 (d,  $J$  = 14.3 Hz), 185.72 (d,  $J$  = 14.3 Hz), 153.17, 149.69 (d,  $J$  = 9.5 Hz), 149.63 (d,  $J$  = 9.5 Hz), 142.97 (d,  $J$  = 4.8 Hz), 142.94 (d,  $J$  = 4.8 Hz), 137.83, 135.47 (d,  $J$  = 5.4 Hz), 135.44 (d,  $J$  = 5.4 Hz), 134.18, 131.34 (d,  $J$  = 12.4 Hz), 131.26 (d,  $J$  = 12.4 Hz), 131.11, 130.68 (d,  $J$  = 4.8 Hz), 130.65 (d,  $J$  = 4.8 Hz), 129.22 (d,  $J$  = 14.0 Hz), 129.13 (d,  $J$  = 14.0 Hz), 128.19, 127.52 (d,  $J$  = 1.8 Hz), 127.51 (d,  $J$  = 1.8 Hz), 125.72, 124.91, 124.69, 124.14 (d,  $J$  = 9.4 Hz), 124.07 (d,  $J$  = 9.4 Hz), 123.88 (d,  $J$  = 130.0 Hz), 123.02 (d,  $J$  = 130.0 Hz), 121.02, 120.89 (d,  $J$  = 10.7 Hz), 120.82 (d,  $J$  = 10.7 Hz), 120.18 (d,  $J$  = 5.9 Hz), 120.14 (d,  $J$  = 5.9 Hz), 119.67 (d,  $J$  = 3.8 Hz), 119.65 (d,  $J$  = 3.8 Hz), 114.81, 113.41, 107.67 (d,  $J$  = 131.7 Hz), 106.79 (d,  $J$  = 131.7 Hz).  $^{31}\text{P}$  NMR (243 MHz, DMSO)  $\delta$  26.12 (d,  $J$  = 13.2 Hz). HRMS (EI):  $m/z$   $[\text{M}]^+$  calcd. for  $\text{C}_{27}\text{H}_{18}\text{NO}_3\text{P}$ : 435.1024. Found: 435.1021.

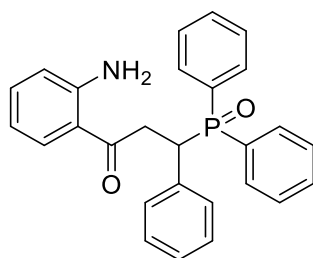

**1-(2-aminophenyl)-3-(diphenylphosphoryl)-3-phenylpropan-1-one (5a):** Compound **5a** was isolated as a faint yellow oil (68.1 mg, 80%) by a column chromatography on silica gel (eluent: petroleum ether/ethyl acetate = 10:1).  $^1\text{H}$  NMR (400 MHz, DMSO)  $\delta$  8.08 (d,  $J$  = 5.9 Hz, 2H), 7.80 – 7.71 (m, 2H), 7.60 (d,  $J$  = 10.2 Hz, 4H), 7.45 – 7.32 (m, 5H), 7.22 – 7.09 (m, 5H), 7.08 – 7.02 (m, 1H), 6.71 (d,  $J$  = 8.3 Hz, 1H), 6.44 (t,  $J$  = 7.4 Hz, 1H), 4.72 – 4.61 (m, 1H), 3.99 – 3.86 (m, 1H), 3.10 (dd,  $J$  = 16.3, 10.5 Hz, 1H).  $^{13}\text{C}$  NMR (151 MHz, DMSO)  $\delta$  198.16 (d,  $J$  = 13.9 Hz), 198.07 (d,  $J$  = 13.9 Hz), 151.60, 137.02 (d,  $J$  = 5.3 Hz), 136.98 (d,  $J$  = 5.3 Hz), 134.82, 133.37 (d,  $J$  = 92.6 Hz), 132.98 (d,  $J$  = 98.5 Hz), 132.76 (d,  $J$  = 92.6 Hz), 132.33 (d,  $J$  = 98.5 Hz), 132.29, 131.77, 131.39 (d,  $J$  = 7.4 Hz), 131.35 (d,  $J$  = 7.4 Hz), 131.34, 131.28 (d,  $J$  = 8.4 Hz), 131.23 (d,  $J$  = 8.4 Hz), 130.26 (d,  $J$  = 5.1 Hz), 130.23 (d,  $J$  = 5.1 Hz), 129.39 (d,  $J$  = 11.0 Hz), 129.31 (d,  $J$  = 11.0 Hz), 128.66 (d,  $J$  = 11.5 Hz), 128.59 (d,  $J$  = 11.5 Hz), 128.24, 127.02, 117.41, 116.57, 114.96, 41.11 (d,  $J$  = 68.1 Hz), 40.66 (d,  $J$  = 68.1 Hz), 38.73.  $^{31}\text{P}$  NMR (243 MHz, DMSO)  $\delta$  32.45 (s). HRMS (EI):  $m/z$   $[\text{M}]^+$  calcd. for  $\text{C}_{27}\text{H}_{24}\text{NO}_2\text{P}$ : 425.1545. Found: 425.1543.

#### 4. Copies of NMR Spectra

##### (Z)-2-((diphenylphosphoryl)(phenyl)methylene)indolin-3-one (3a): $^1\text{H}$ NMR

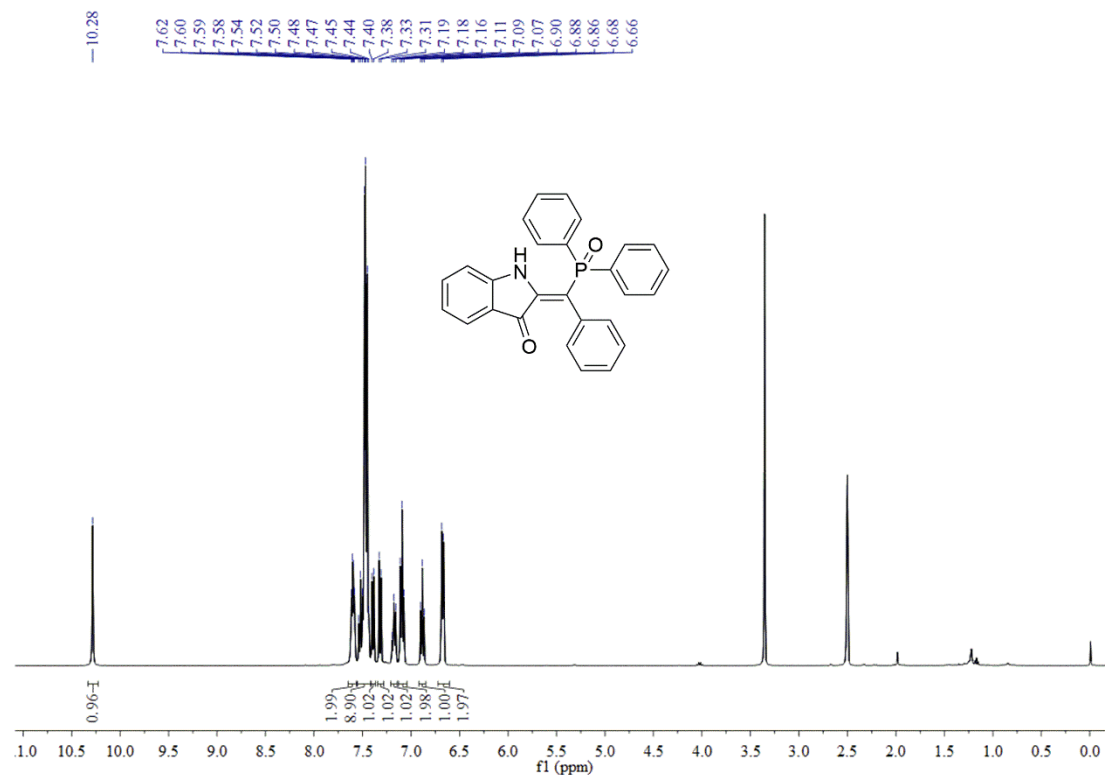

##### (Z)-2-((diphenylphosphoryl)(phenyl)methylene)indolin-3-one (3a): $^{13}\text{C}$ NMR

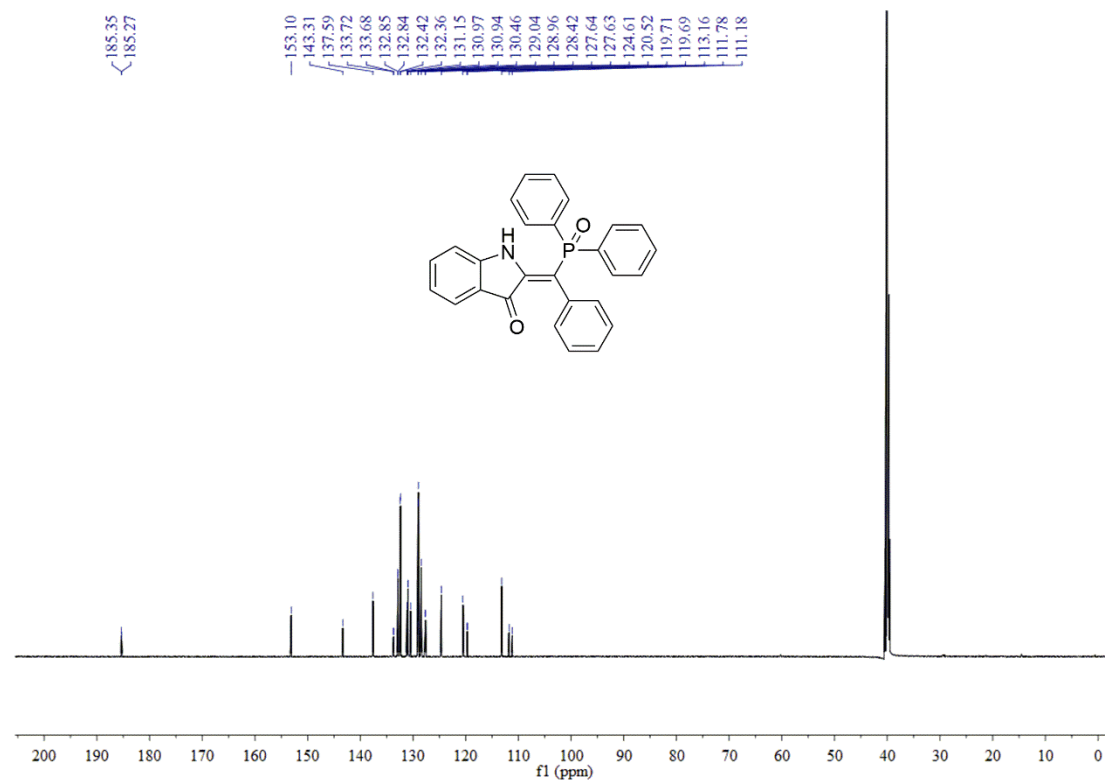

**(Z)-2-((diphenylphosphoryl)(phenyl)methylene)indolin-3-one (3a): <sup>31</sup>P NMR**

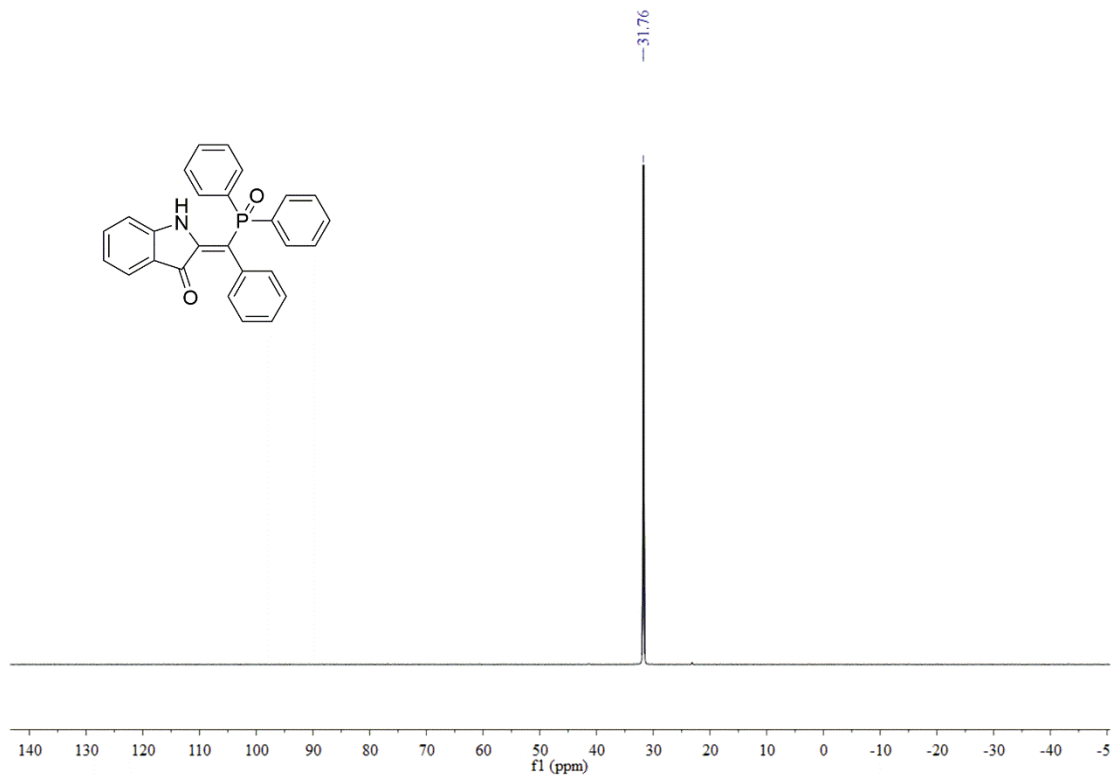

**(Z)-2-((diphenylphosphoryl)(p-tolyl)methylene)indolin-3-one (3b): <sup>1</sup>H NMR**

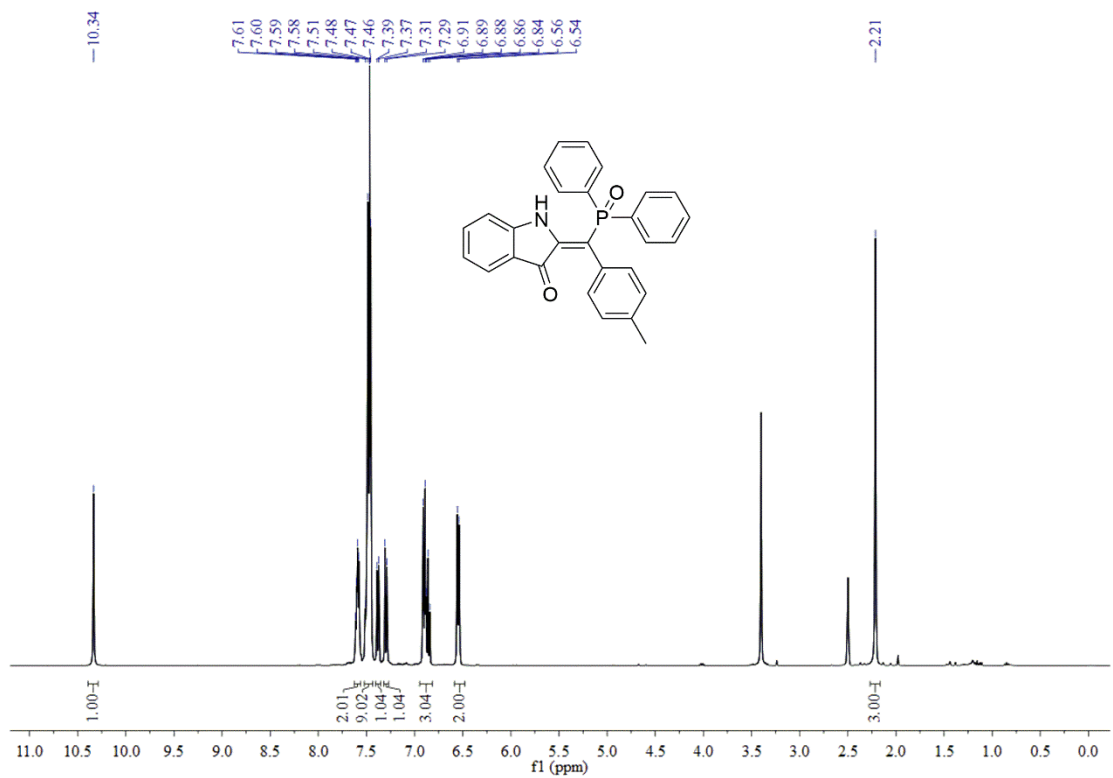



**(Z)-2-((diphenylphosphoryl)(p-tolyl)methylene)indolin-3-one (3b):  $^{13}\text{C}$  NMR**

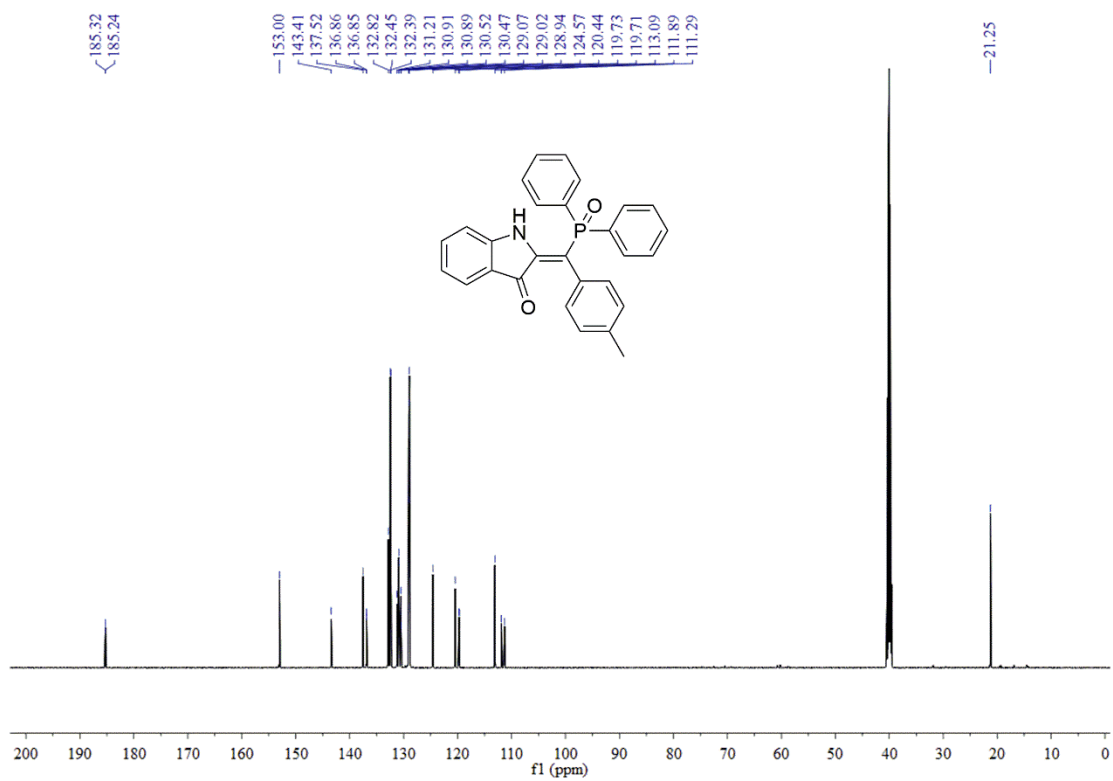

**(Z)-2-((diphenylphosphoryl)(p-tolyl)methylene)indolin-3-one (3b):  $^{31}\text{P}$  NMR**

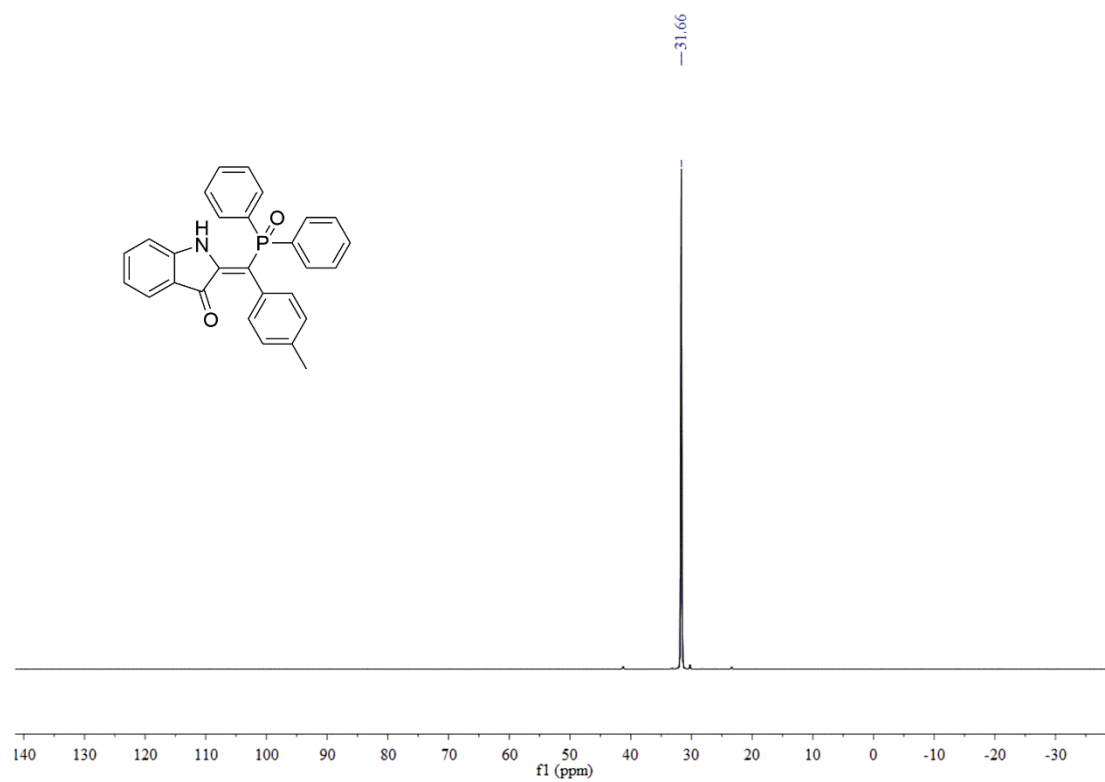

**(Z)-2-((diphenylphosphoryl)(4-ethylphenyl)methylene)indolin-3-one (3c): <sup>1</sup>H NMR**

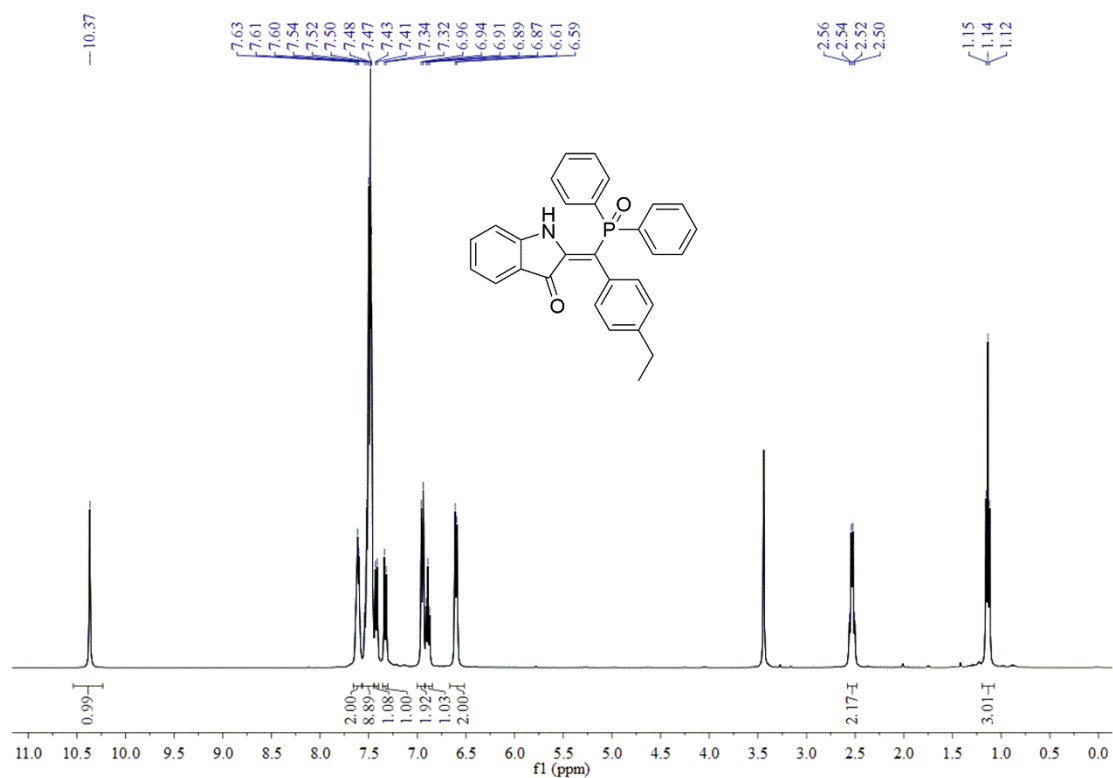

**(Z)-2-((diphenylphosphoryl)(p-tolyl)methylene)indolin-3-one (3c): <sup>13</sup>C NMR**

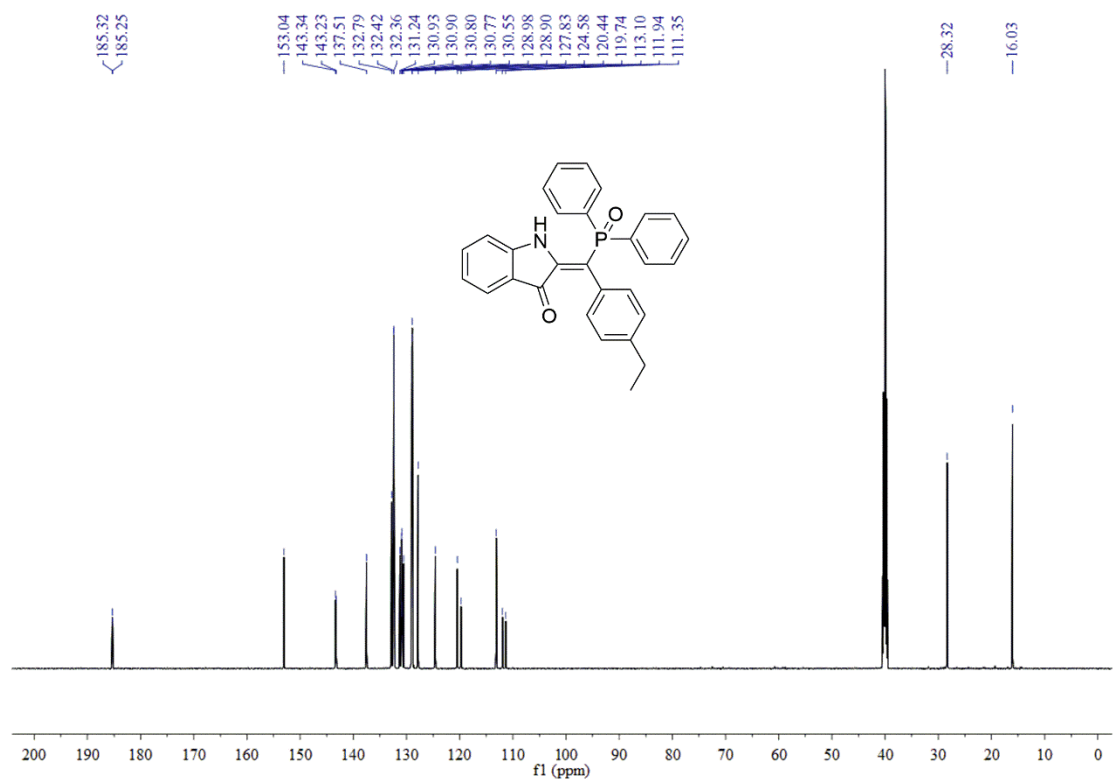

**(Z)-2-((diphenylphosphoryl)(p-tolyl)methylene)indolin-3-one (3c): <sup>31</sup>P NMR**

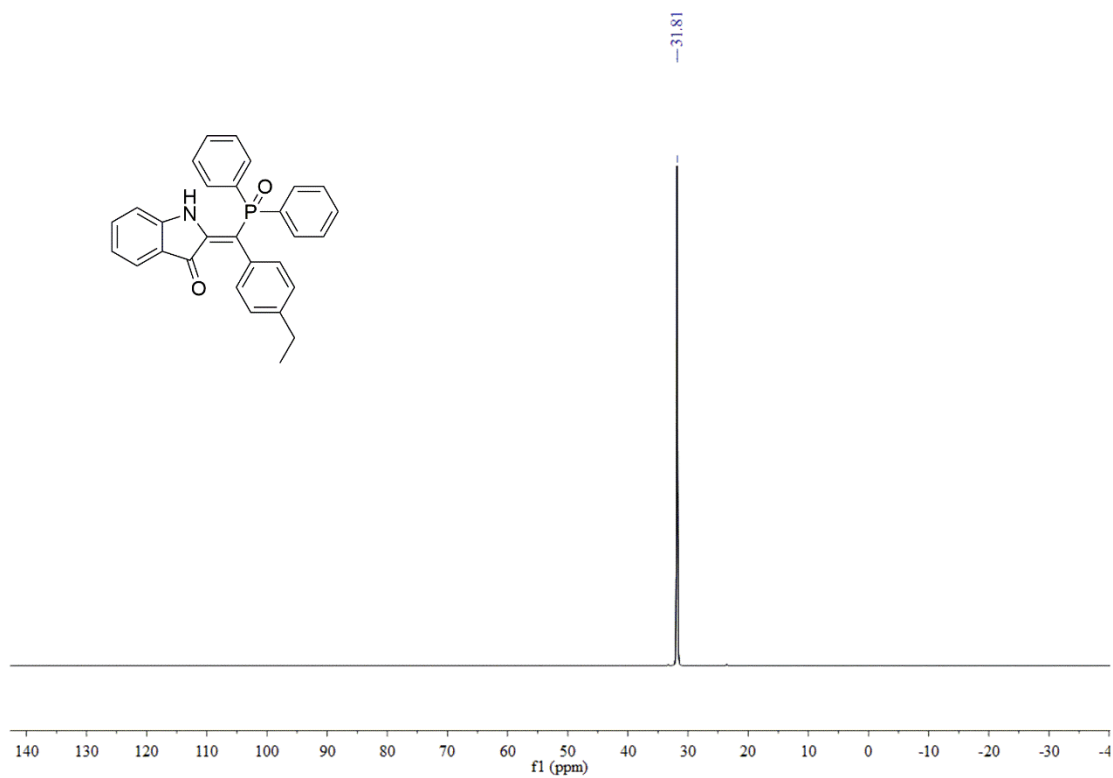

**(Z)-2-((diphenylphosphoryl)(4-isopropylphenyl)methylene)indolin-3-one (3d): <sup>1</sup>H NMR**

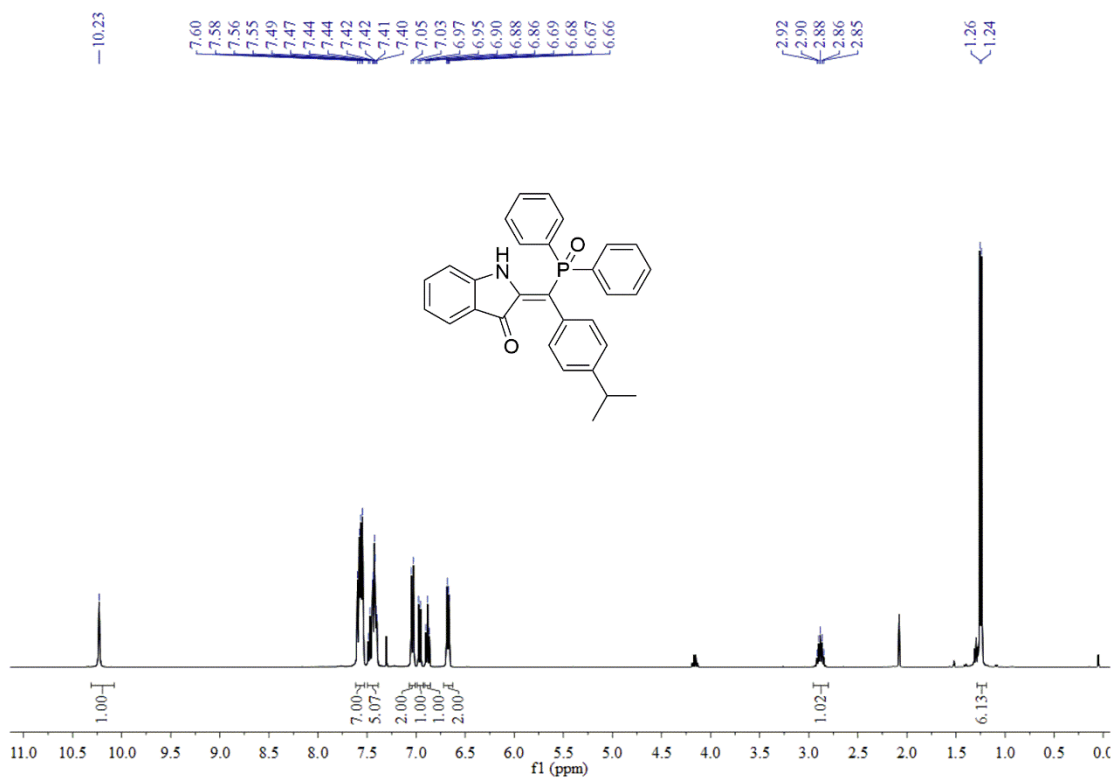

**(Z)-2-((diphenylphosphoryl)(4-isopropylphenyl)methylene)indolin-3-one (3d): <sup>13</sup>C NMR**

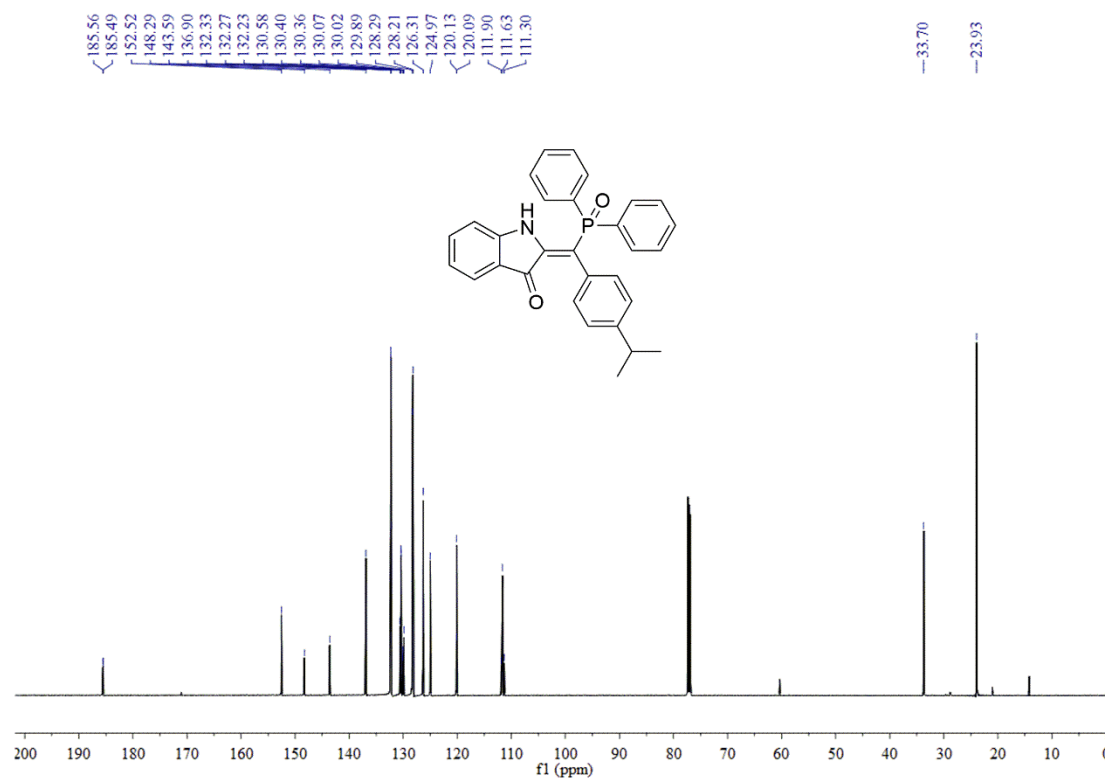

**(Z)-2-((diphenylphosphoryl)(4-isopropylphenyl)methylene)indolin-3-one (3d): <sup>31</sup>P NMR**

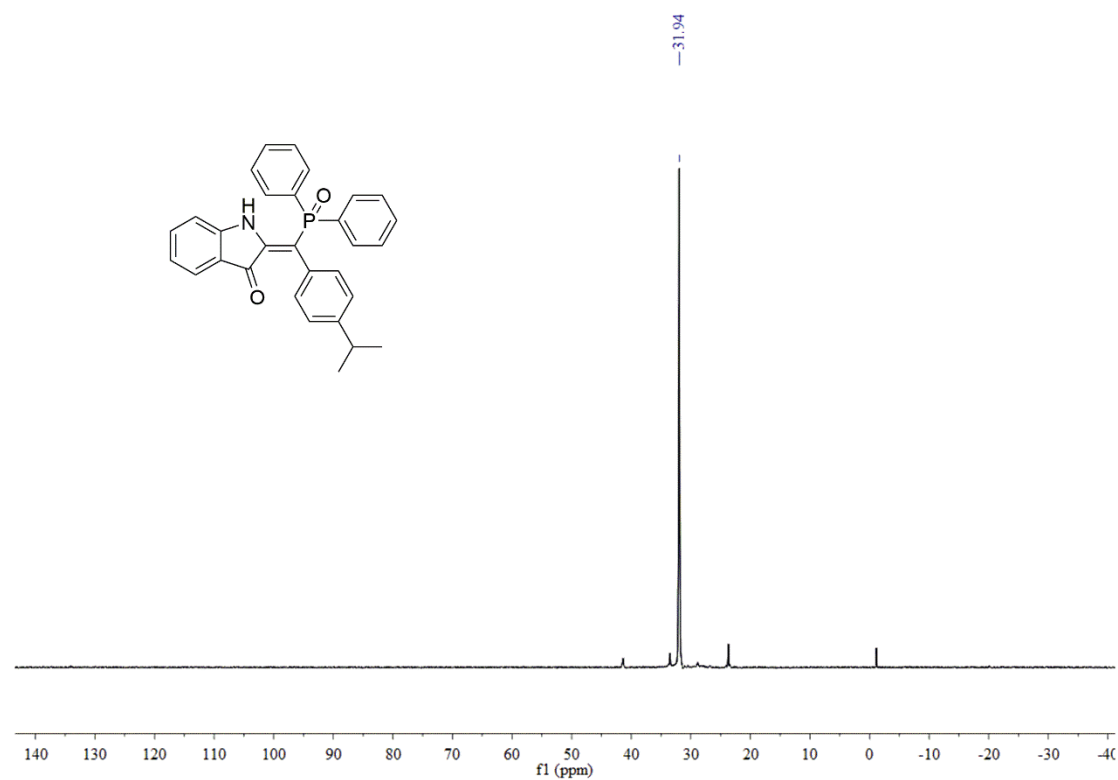

**(Z)-2-((4-(tert-butyl)phenyl)(diphenylphosphoryl)methylene)indolin-3-one (3e): <sup>1</sup>H NMR**

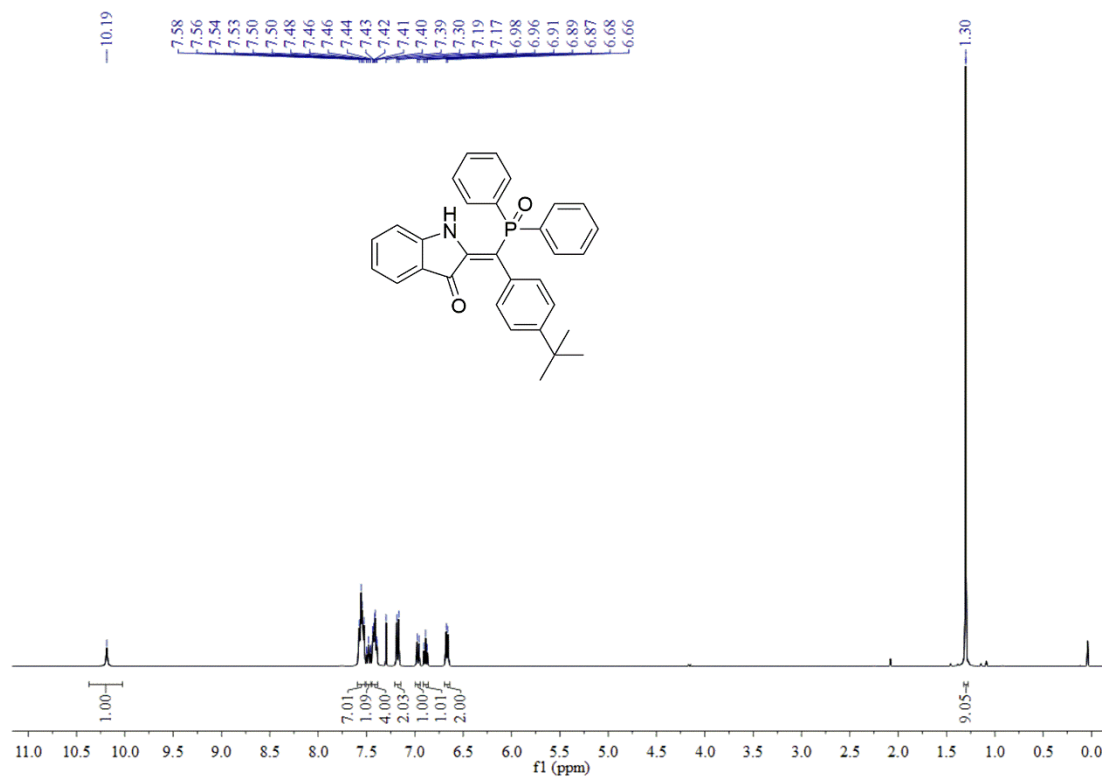

**(Z)-2-((4-(tert-butyl)phenyl)(diphenylphosphoryl)methylene)indolin-3-one (3e): <sup>13</sup>C NMR**

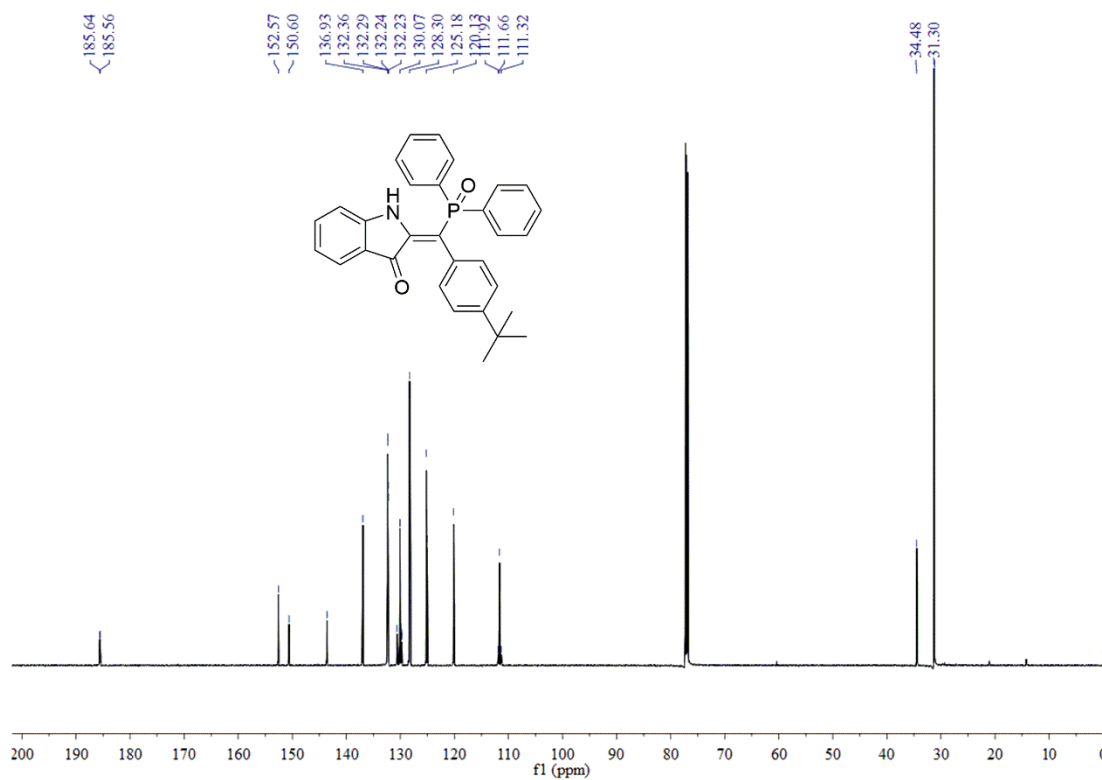

**(Z)-2-((4-(tert-butyl)phenyl)(diphenylphosphoryl)methylene)indolin-3-one (3e): <sup>31</sup>P NMR**

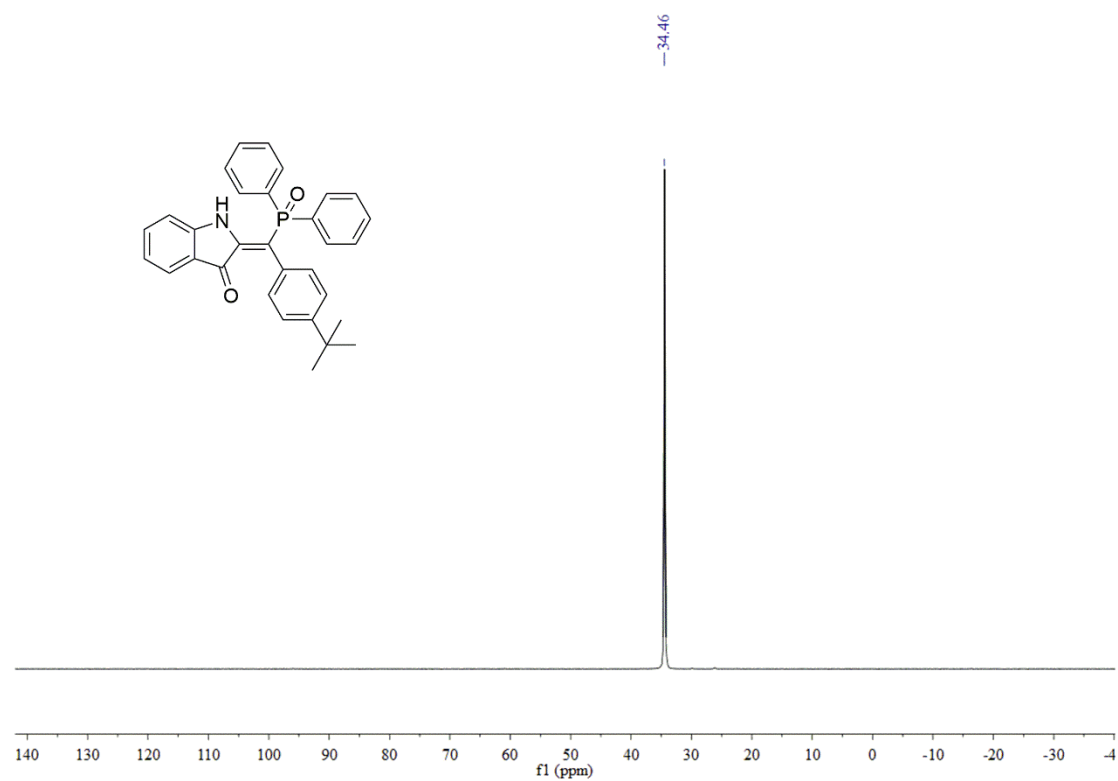

**(Z)-2-((diphenylphosphoryl)(4-methoxyphenyl)methylene)indolin-3-one (3f): <sup>1</sup>H NMR**

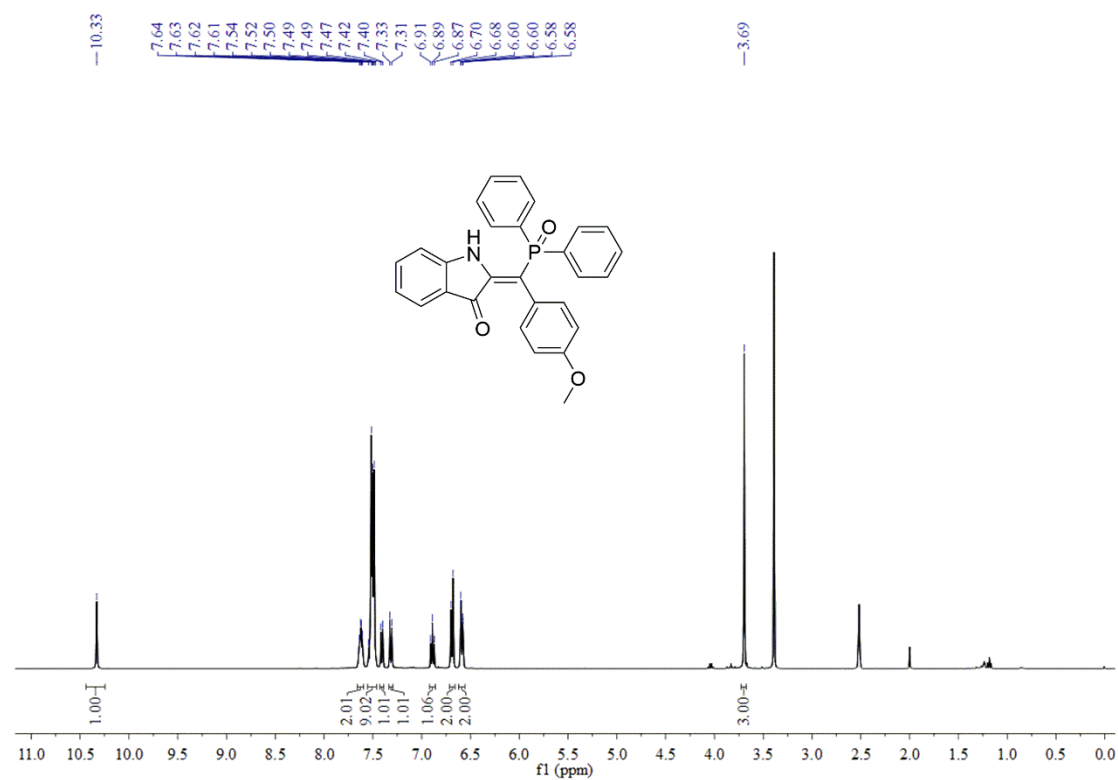

**(Z)-2-((diphenylphosphoryl)(4-methoxyphenyl)methylene)indolin-3-one (3f): <sup>13</sup>C NMR**

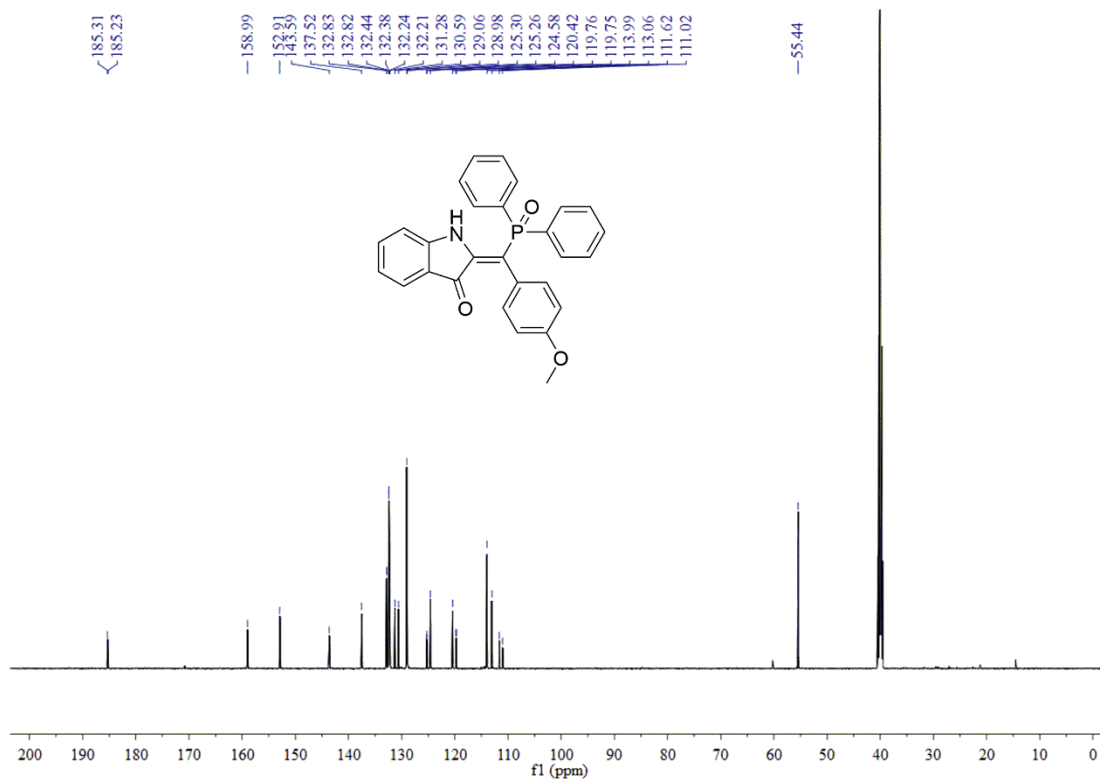

**(Z)-2-((diphenylphosphoryl)(4-methoxyphenyl)methylene)indolin-3-one (3f): <sup>31</sup>P NMR**

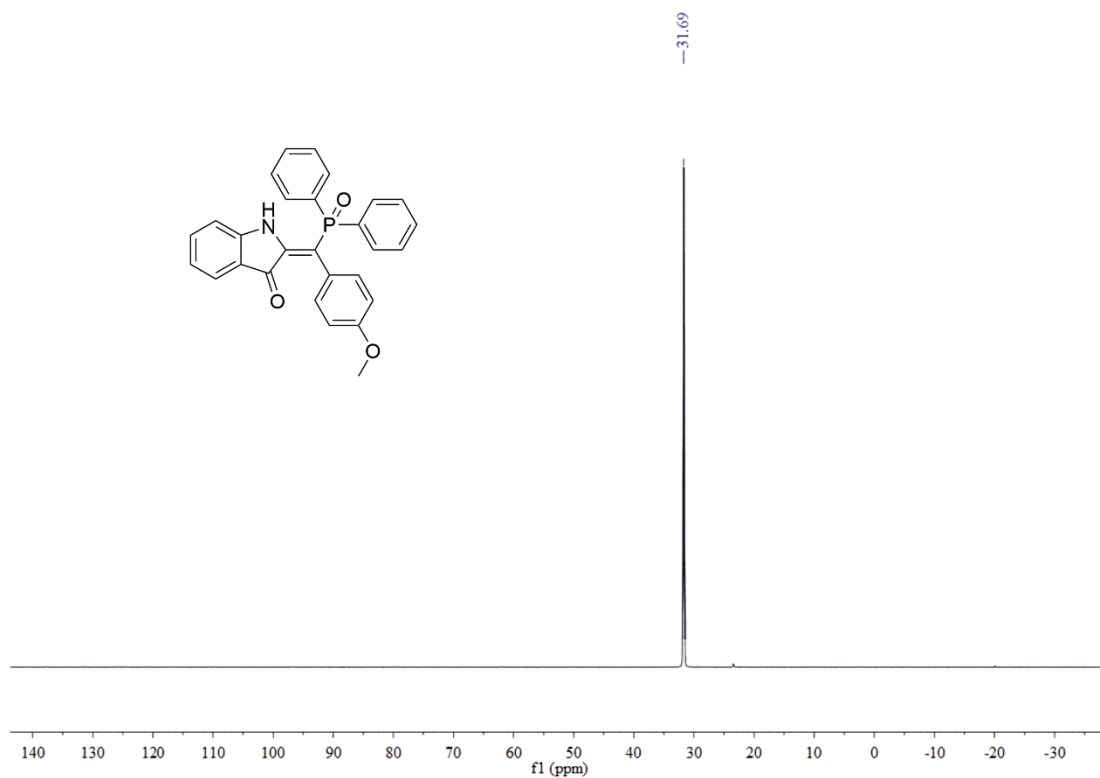

**(Z)-2-((diphenylphosphoryl)(4-(methylthio)phenyl)methylene)indolin-3-one (3g): <sup>1</sup>H NMR**

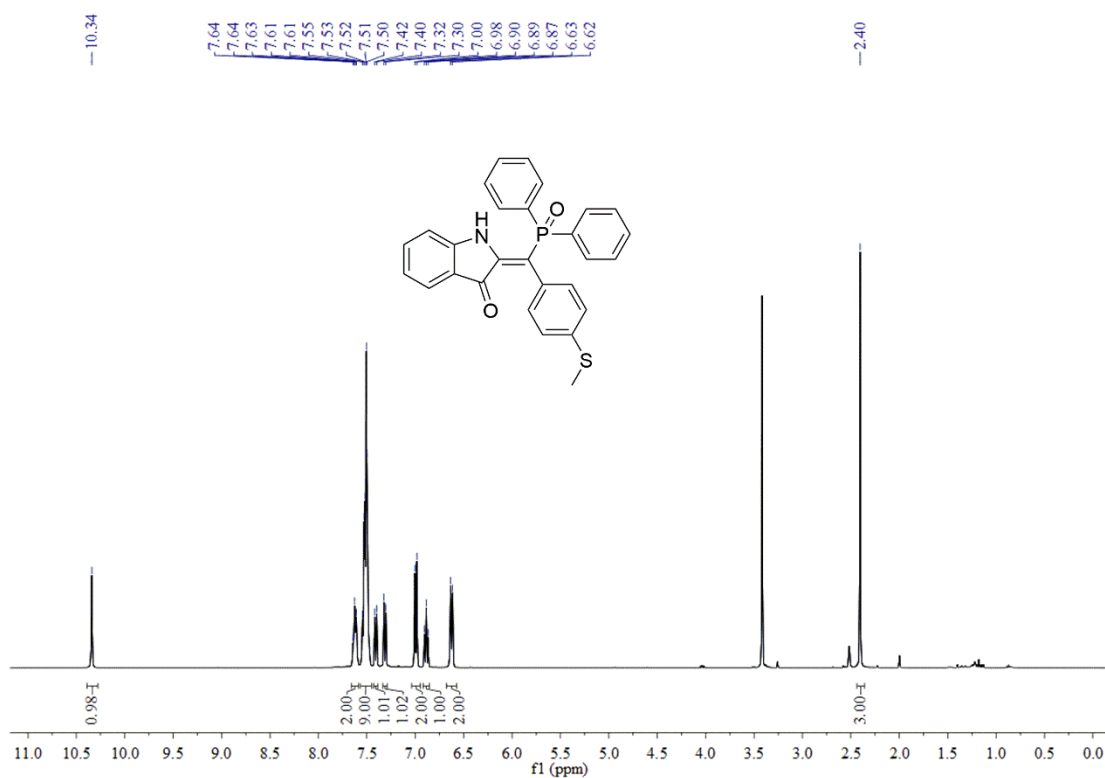

**(Z)-2-((diphenylphosphoryl)(4-(methylthio)phenyl)methylene)indolin-3-one (3g): <sup>13</sup>C NMR**

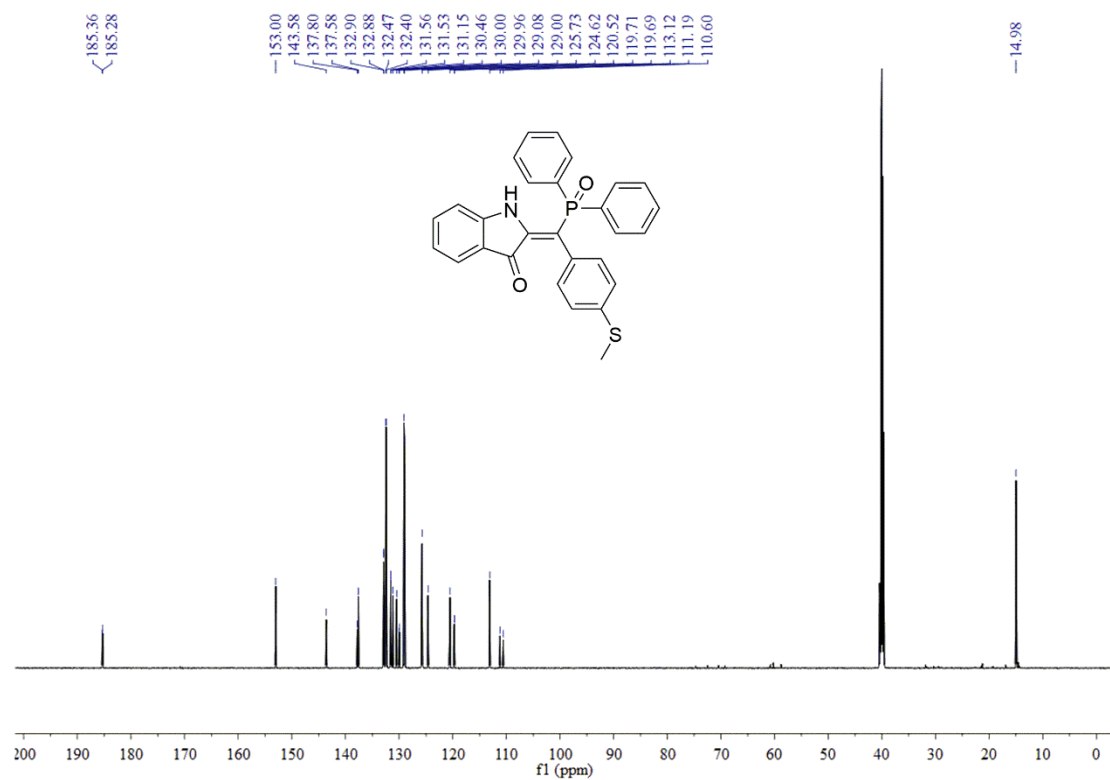



**(Z)-2-((diphenylphosphoryl)(4-(methylthio)phenyl)methylene)indolin-3-one (3g): <sup>31</sup>P NMR**

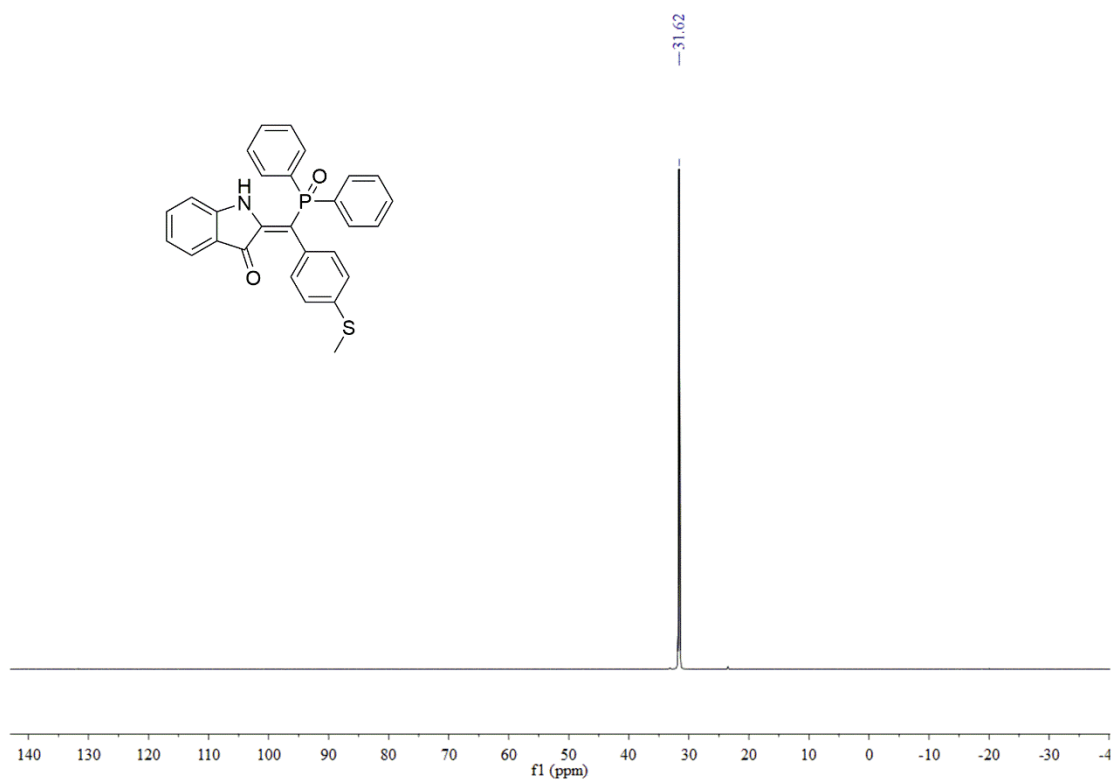

**(Z)-2-((4-bromophenyl)(diphenylphosphoryl)methylene)indolin-3-one (3h): <sup>1</sup>H NMR**

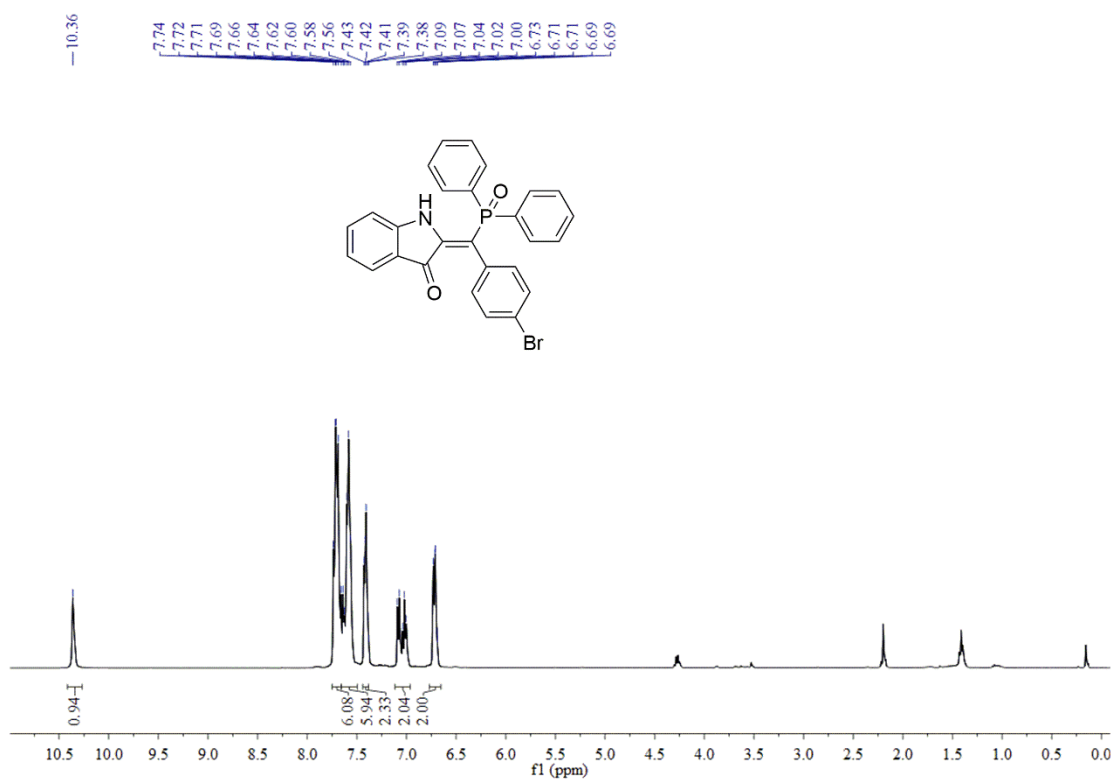

**(Z)-2-((4-bromophenyl)(diphenylphosphoryl)methylene)indolin-3-one (3h): <sup>13</sup>C NMR**

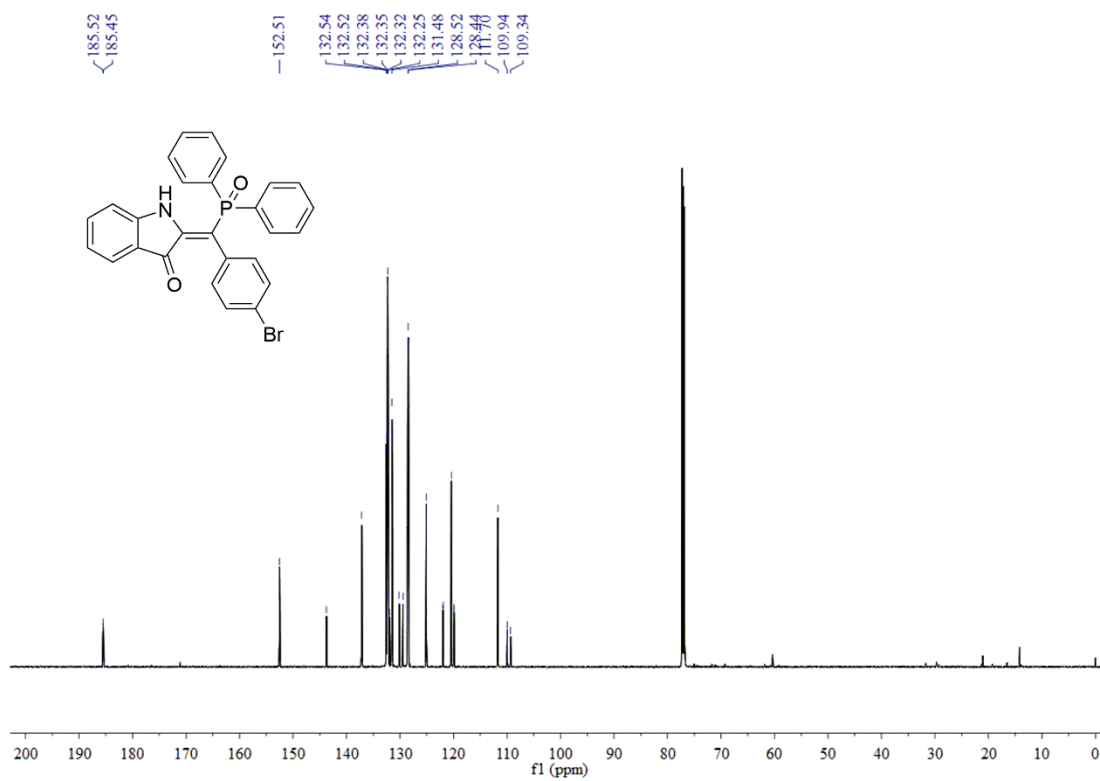

**(Z)-2-((4-bromophenyl)(diphenylphosphoryl)methylene)indolin-3-one (3h): <sup>31</sup>P NMR**

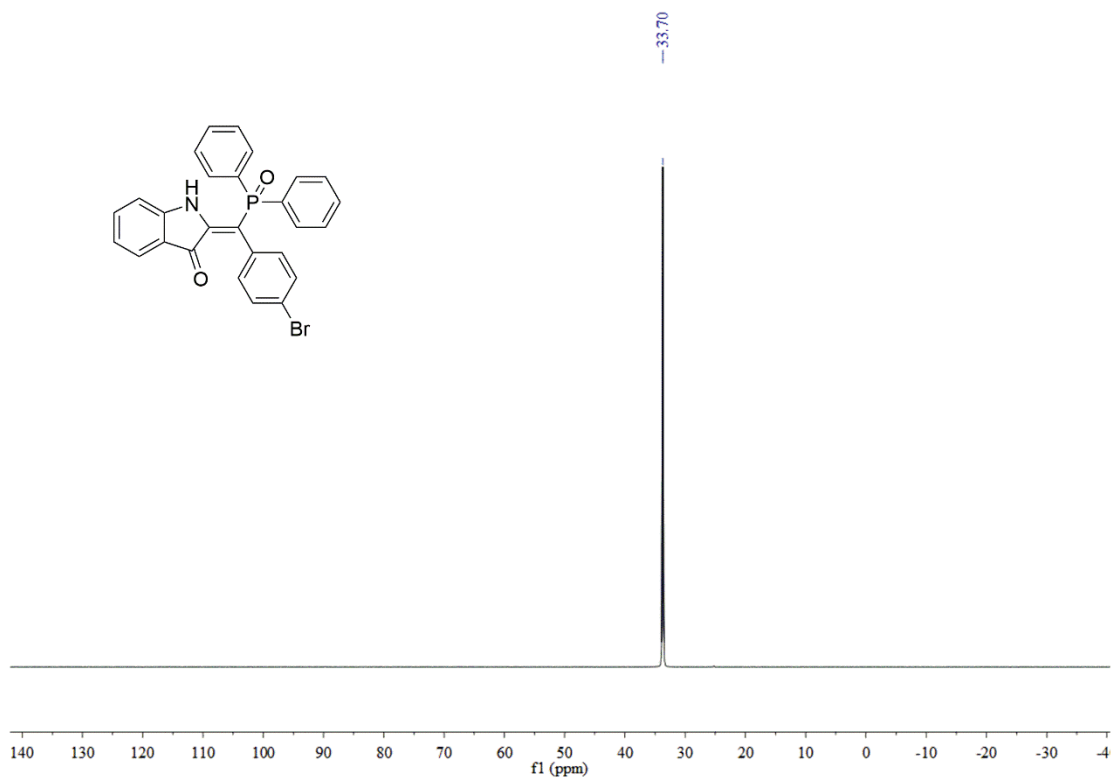

**(Z)-2-((diphenylphosphoryl)(4-iodophenyl)methylene)indolin-3-one (3i): <sup>1</sup>H NMR**

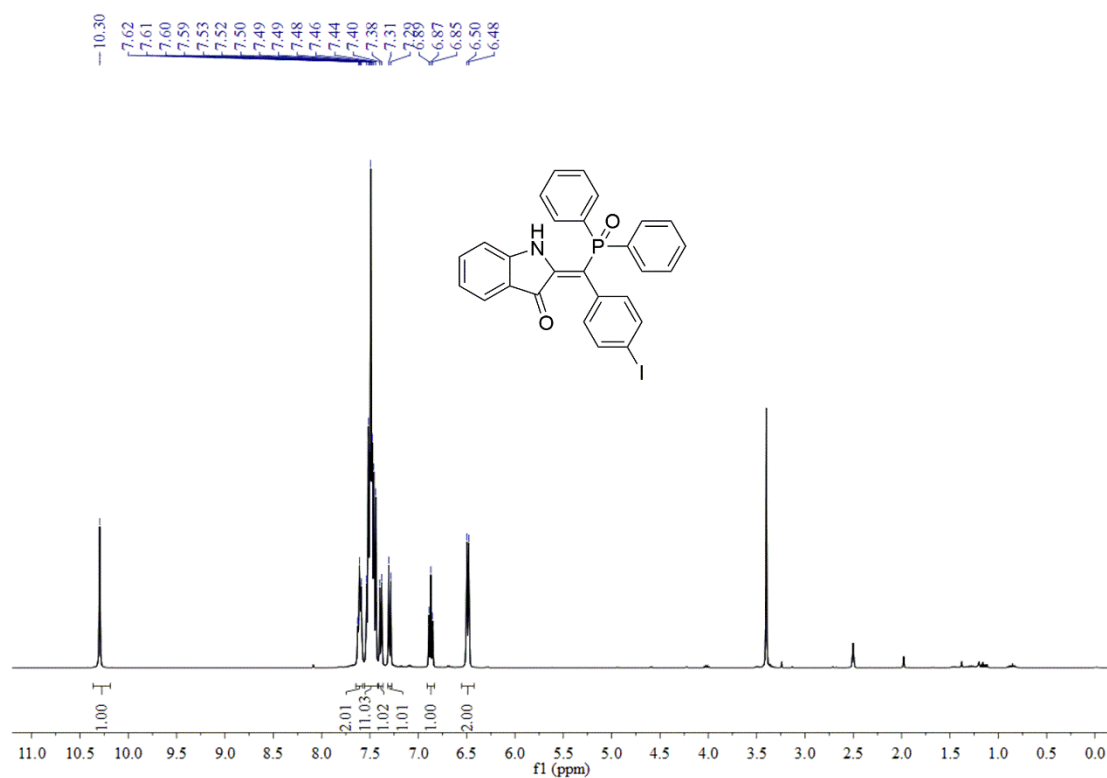

**(Z)-2-((diphenylphosphoryl)(4-iodophenyl)methylene)indolin-3-one (3i): <sup>13</sup>C NMR**

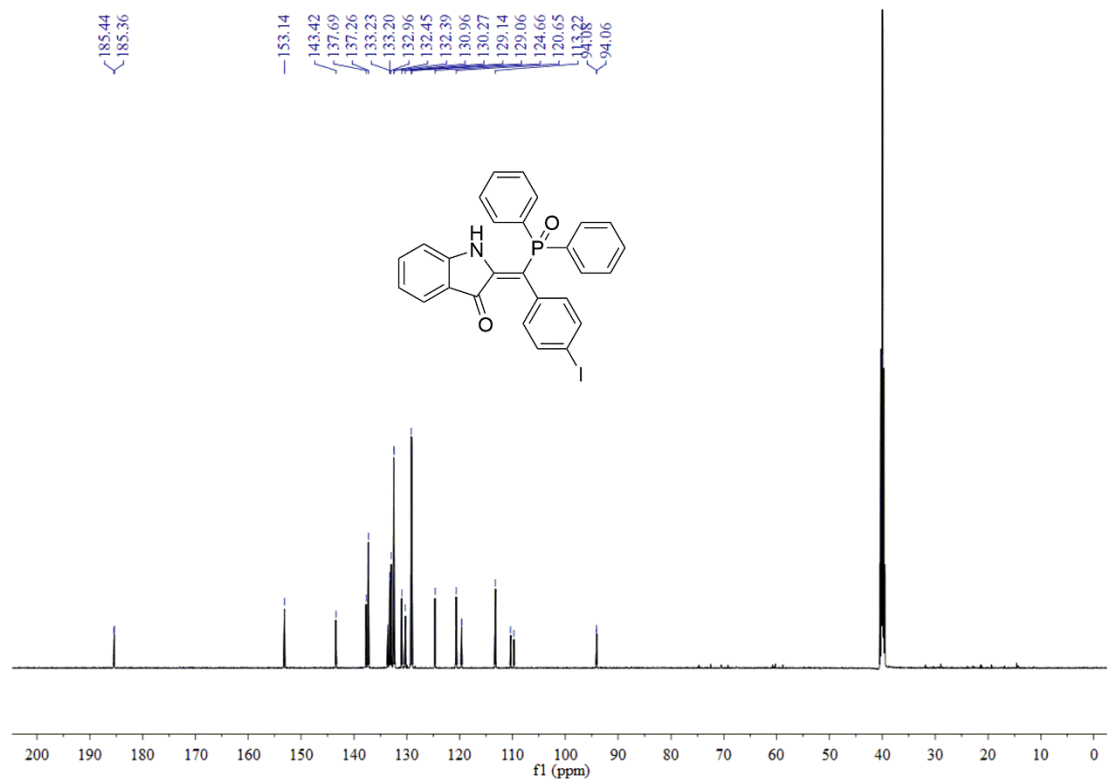

**(Z)-2-((diphenylphosphoryl)(4-iodophenyl)methylene)indolin-3-one (3i): <sup>31</sup>P NMR**

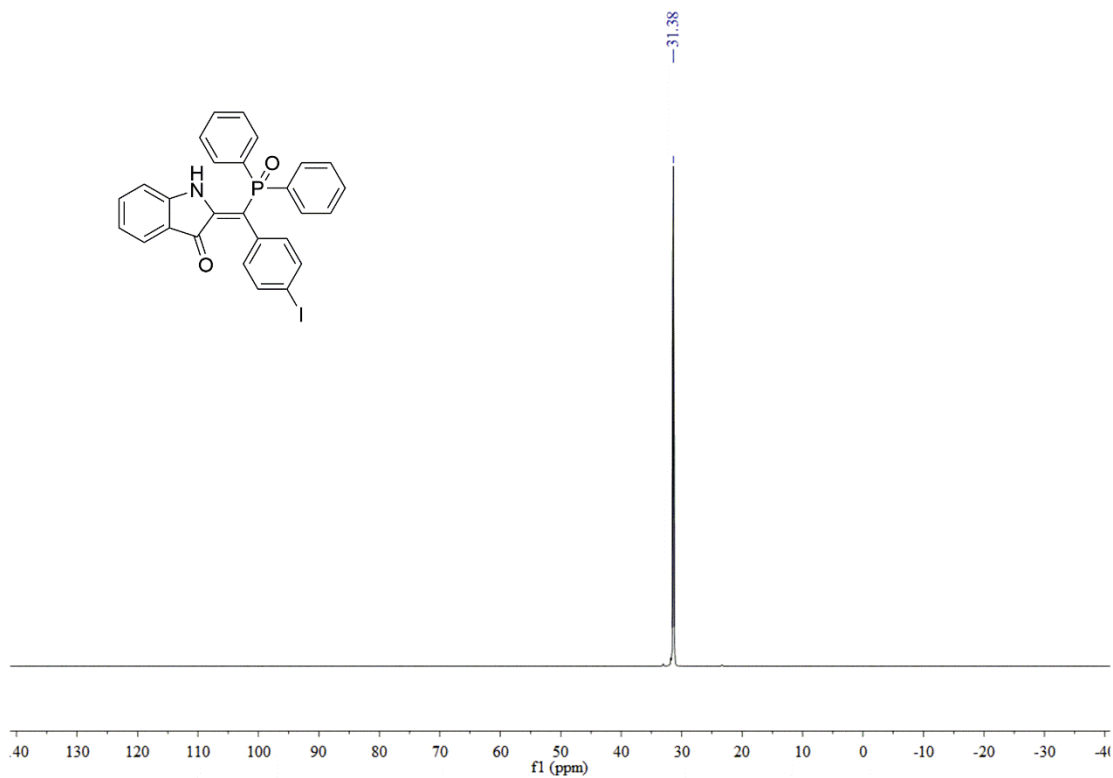

**(Z)-4-((diphenylphosphoryl)(3-oxindolin-2-ylidene)methyl)benzotrile (3j): <sup>1</sup>H NMR**

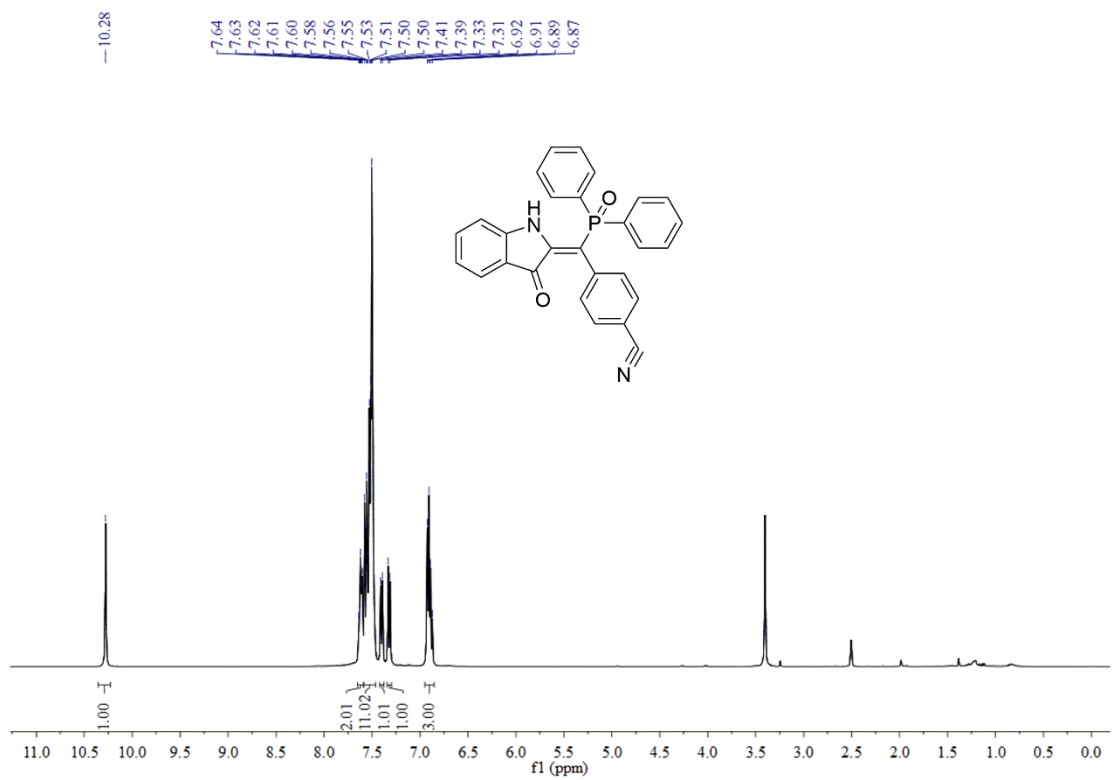

**(Z)-4-((diphenylphosphoryl)(3-oxoindolin-2-ylidene)methyl)benzonitrile (3j): <sup>13</sup>C NMR**

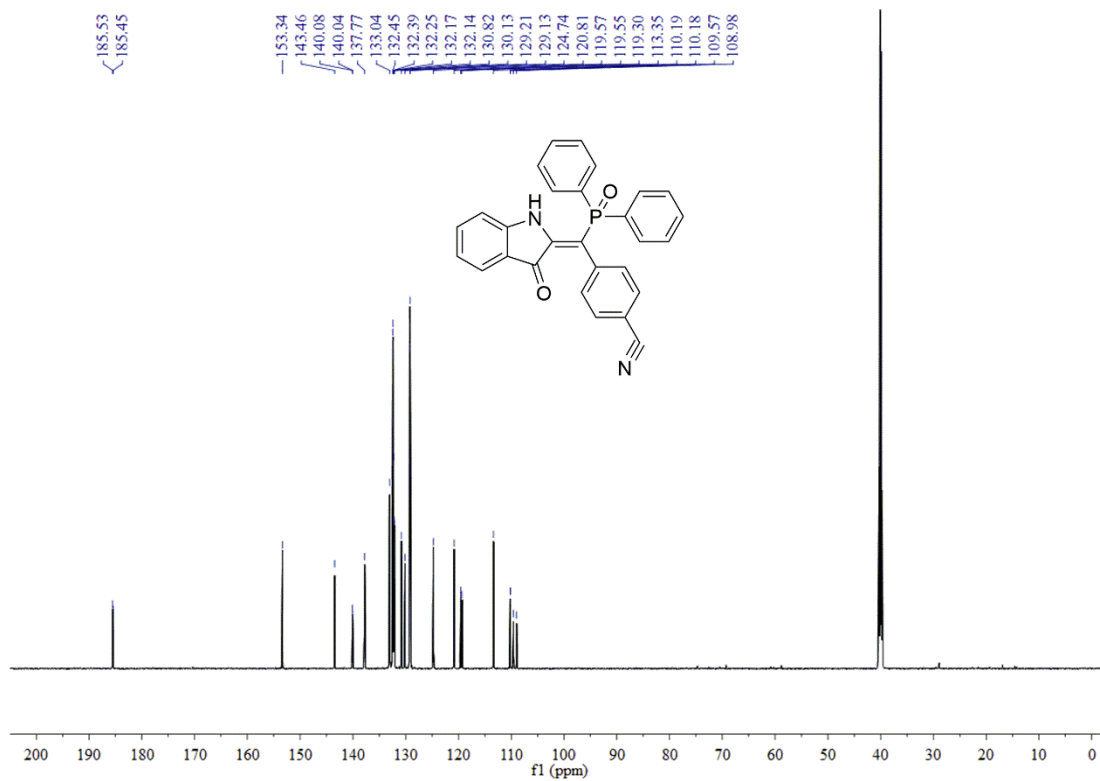

**(Z)-4-((diphenylphosphoryl)(3-oxoindolin-2-ylidene)methyl)benzonitrile (3j): <sup>31</sup>P NMR**

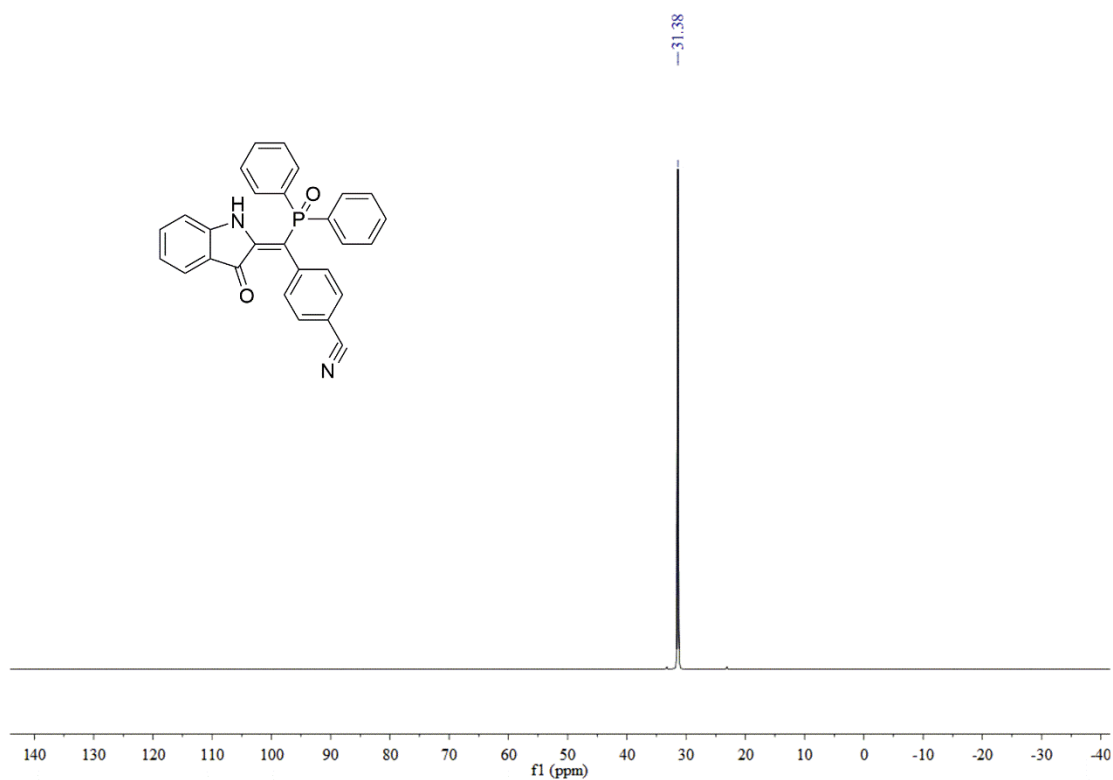

**(Z)-2-((diphenylphosphoryl)(4-nitrophenyl)methylene)indolin-3-one (3k): <sup>1</sup>H NMR**

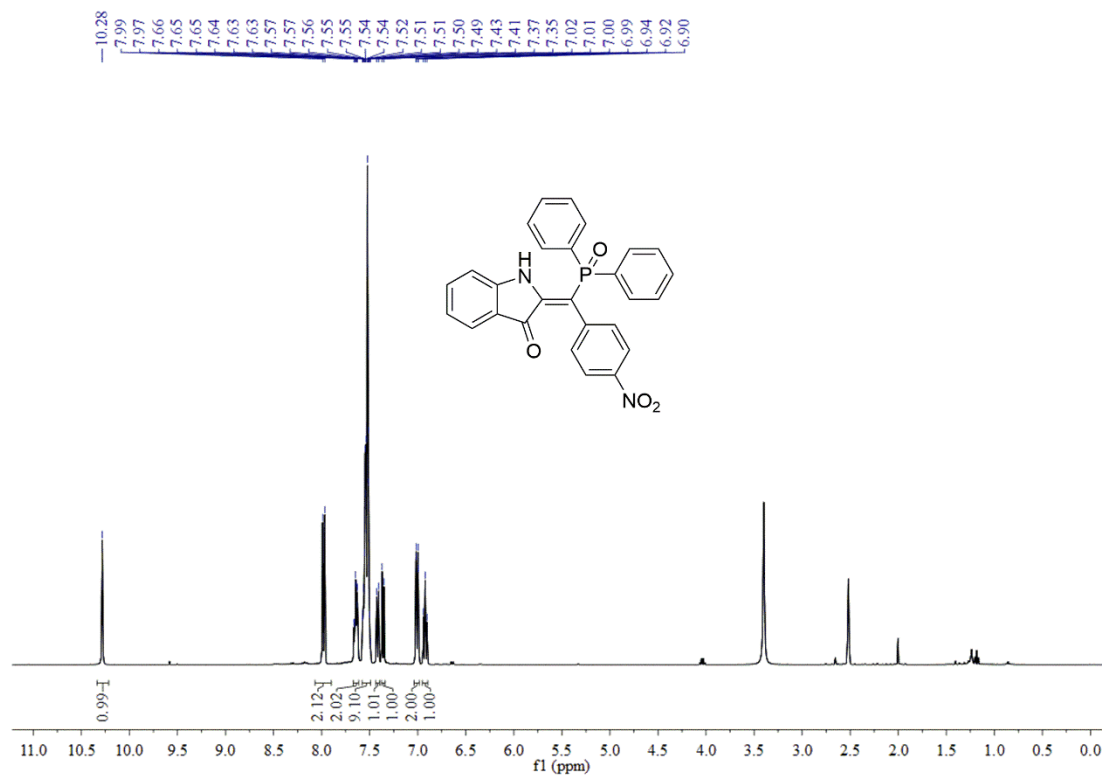

**(Z)-2-((diphenylphosphoryl)(4-nitrophenyl)methylene)indolin-3-one (3k): <sup>13</sup>C NMR**

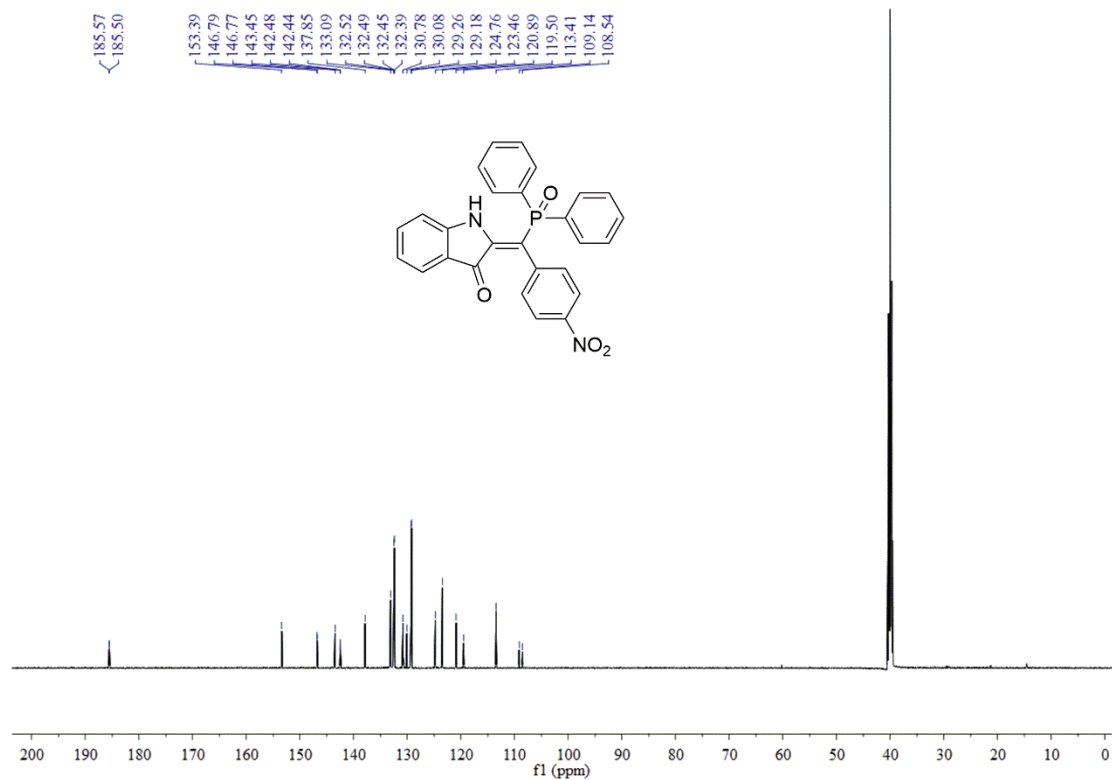

**(Z)-2-((diphenylphosphoryl)(4-nitrophenyl)methylene)indolin-3-one (3k): <sup>31</sup>P NMR**

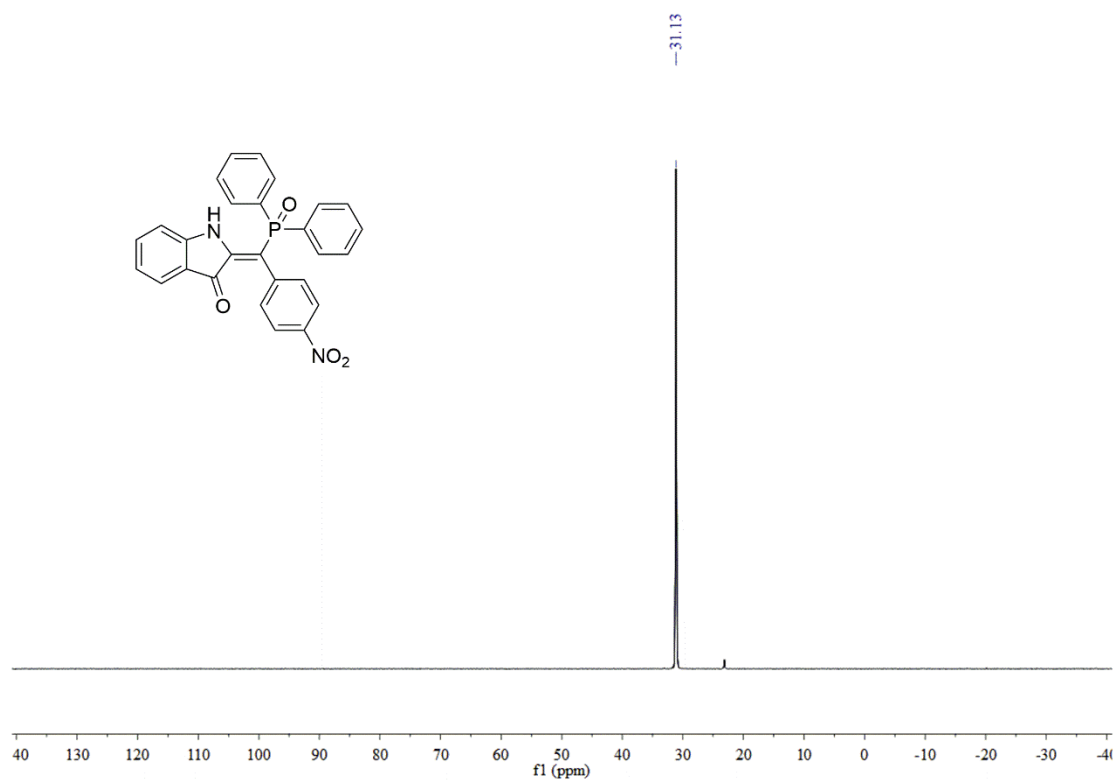

**(Z)-2-((diphenylphosphoryl)(m-tolyl)methylene)indolin-3-one (3l): <sup>1</sup>H NMR**

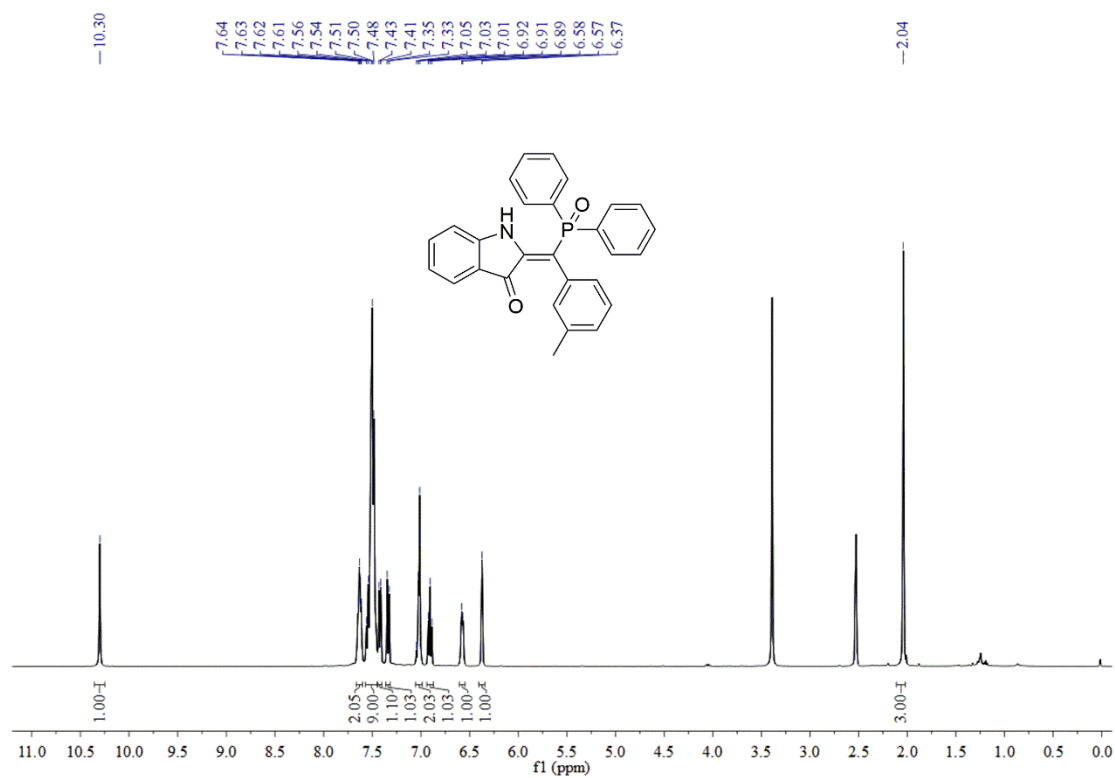

**(Z)-2-((diphenylphosphoryl)(m-tolyl)methylene)indolin-3-one (3l): <sup>13</sup>C NMR**

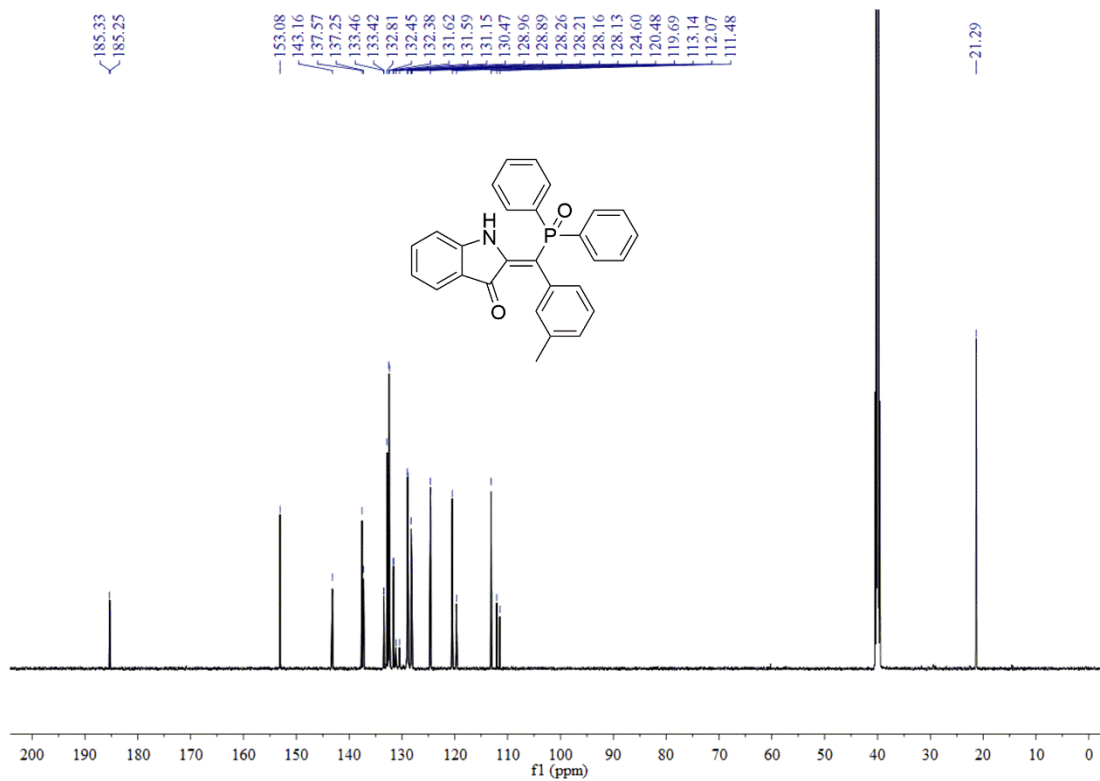

**(Z)-2-((diphenylphosphoryl)(m-tolyl)methylene)indolin-3-one (3l): <sup>31</sup>P NMR**

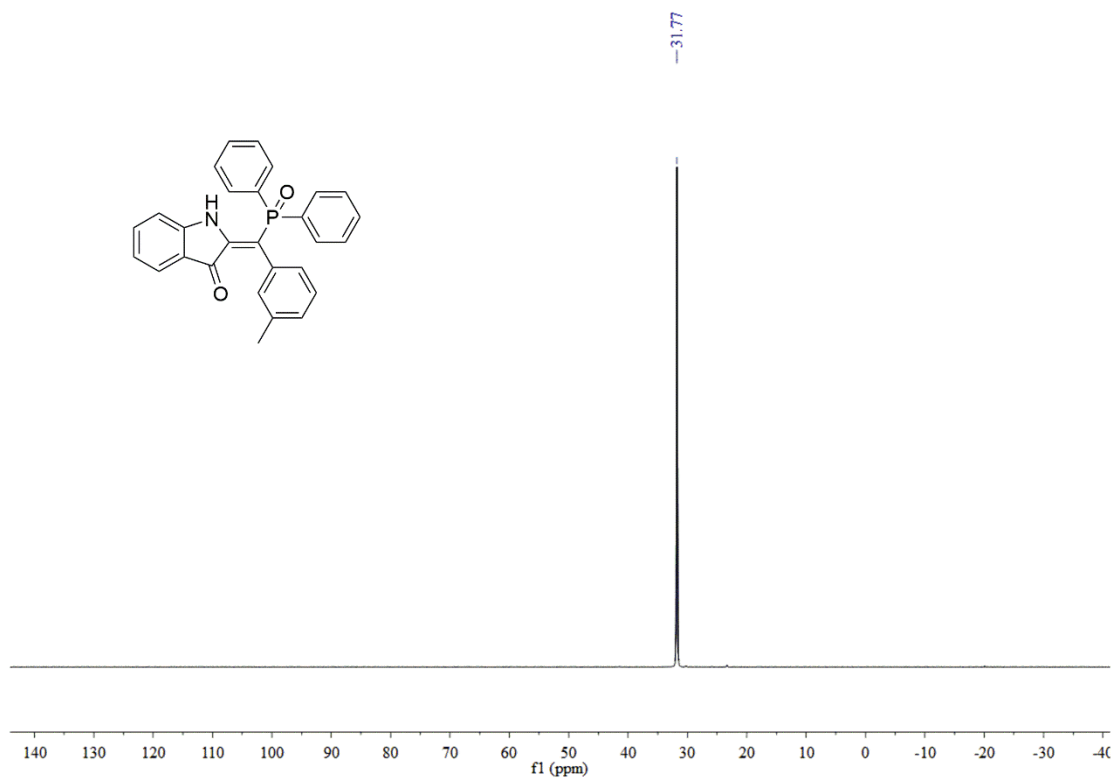



**(Z)-2-((3-(tert-butyl)phenyl)(diphenylphosphoryl)methylene)indolin-3-one (3m): <sup>1</sup>H NMR**

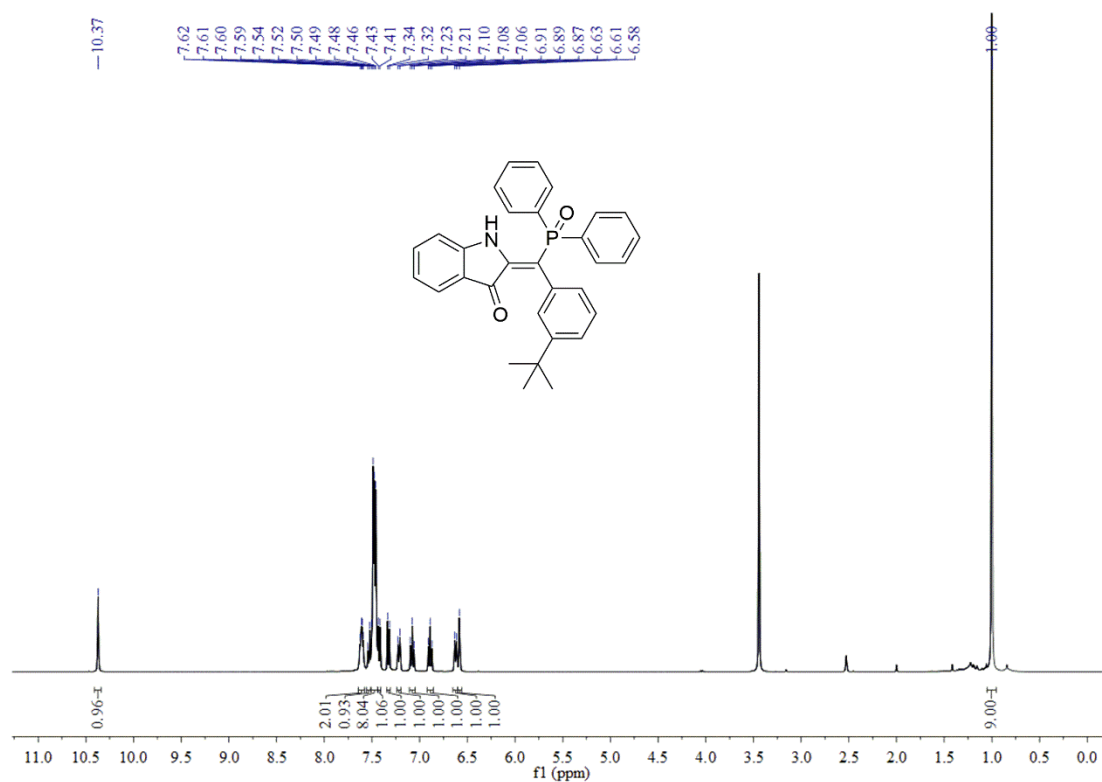

**(Z)-2-((3-(tert-butyl)phenyl)(diphenylphosphoryl)methylene)indolin-3-one (3m): <sup>13</sup>C NMR**

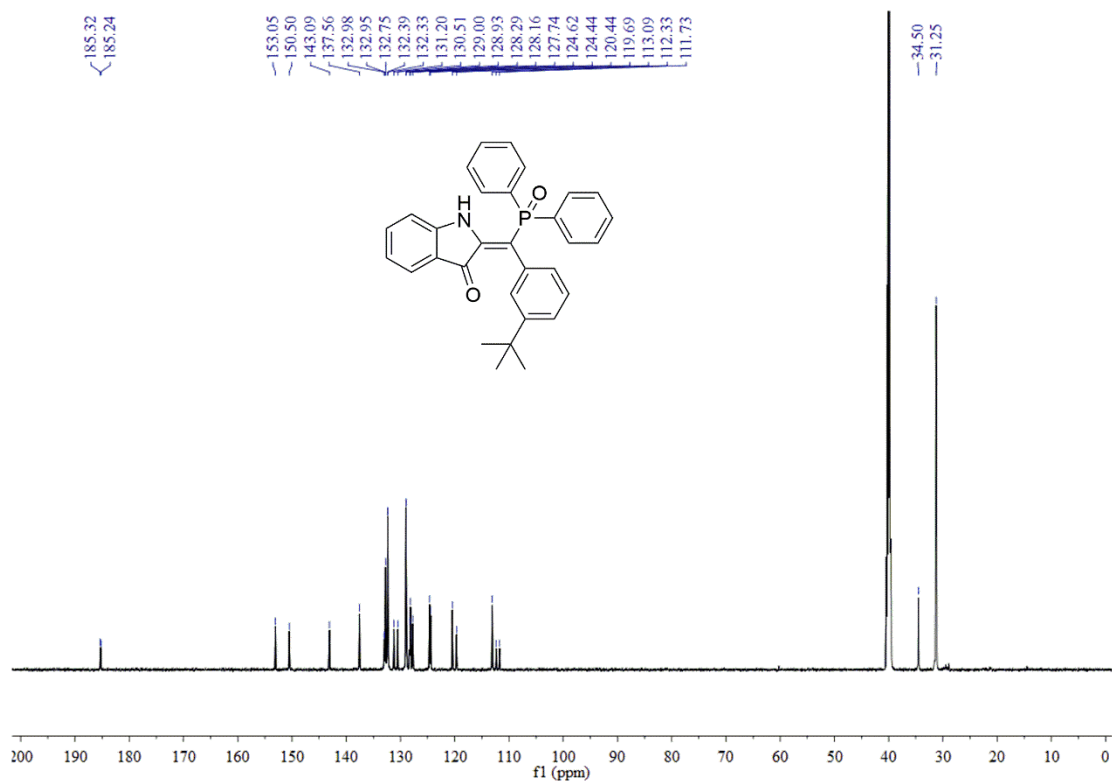

**(Z)-2-((3-(tert-butyl)phenyl)(diphenylphosphoryl)methylene)indolin-3-one (3m):  $^{31}\text{P}$  NMR**

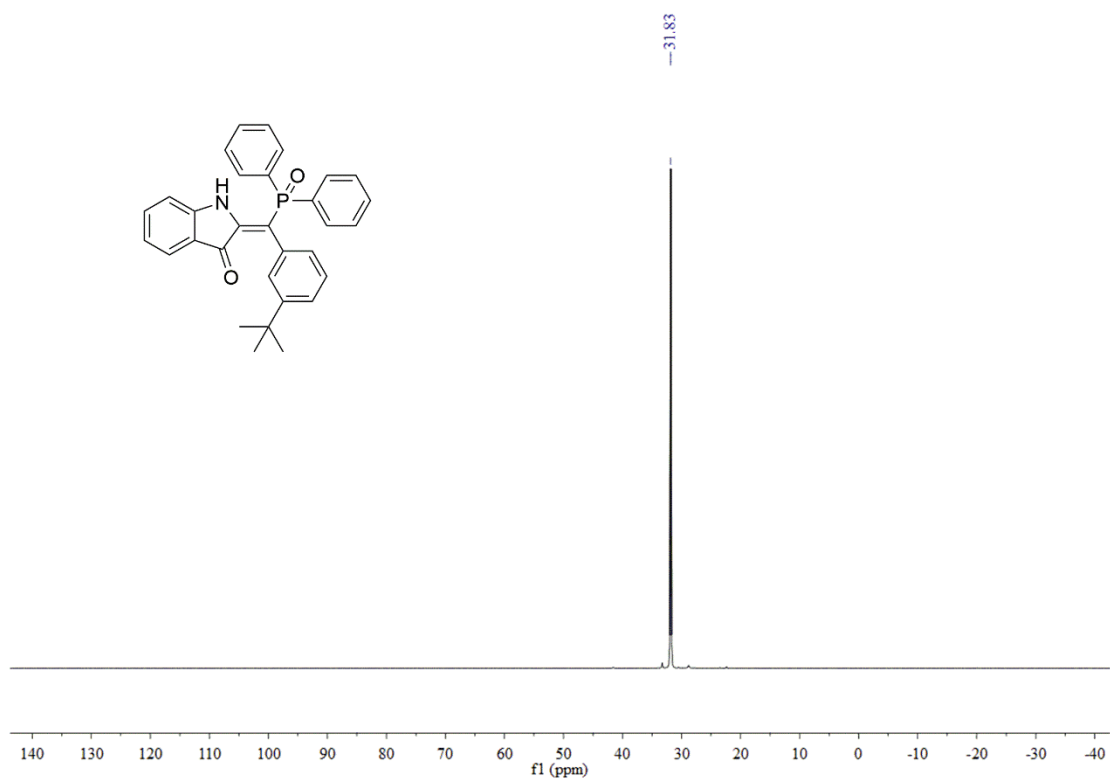

**(Z)-2-((diphenylphosphoryl)(3-methoxyphenyl)methylene)indolin-3-one (3n):  $^1\text{H}$  NMR**

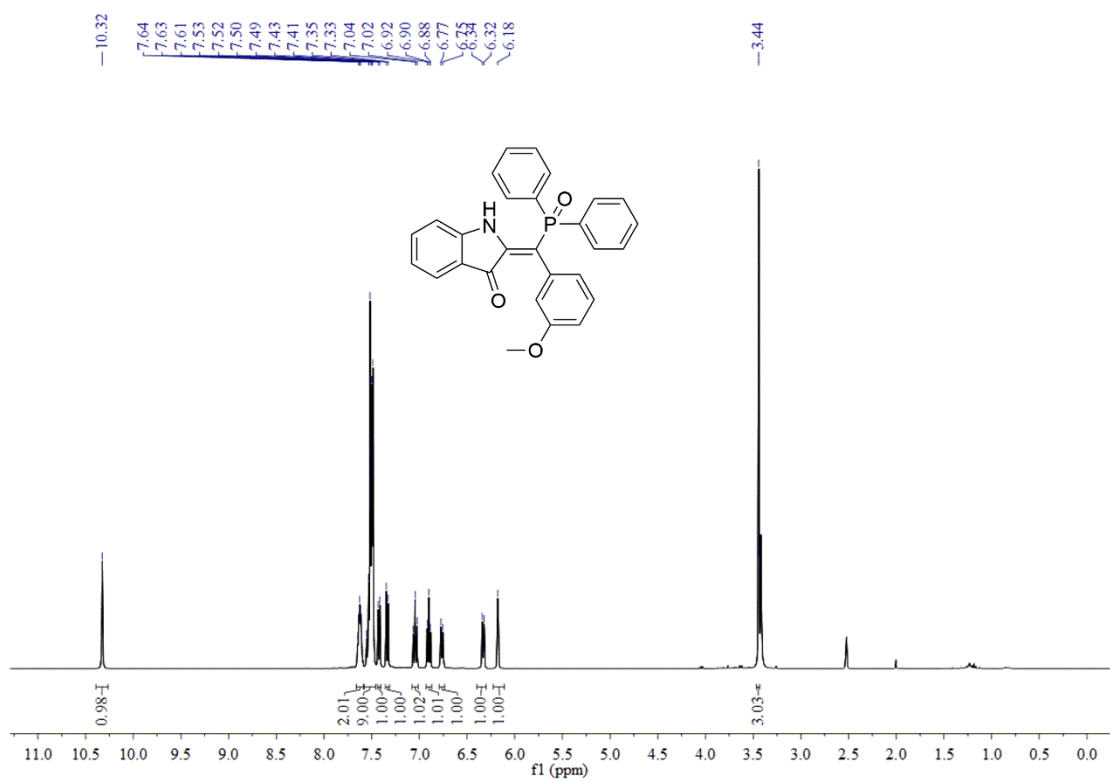

**(Z)-2-((diphenylphosphoryl)(3-methoxyphenyl)methylene)indolin-3-one (3n): <sup>13</sup>C NMR**

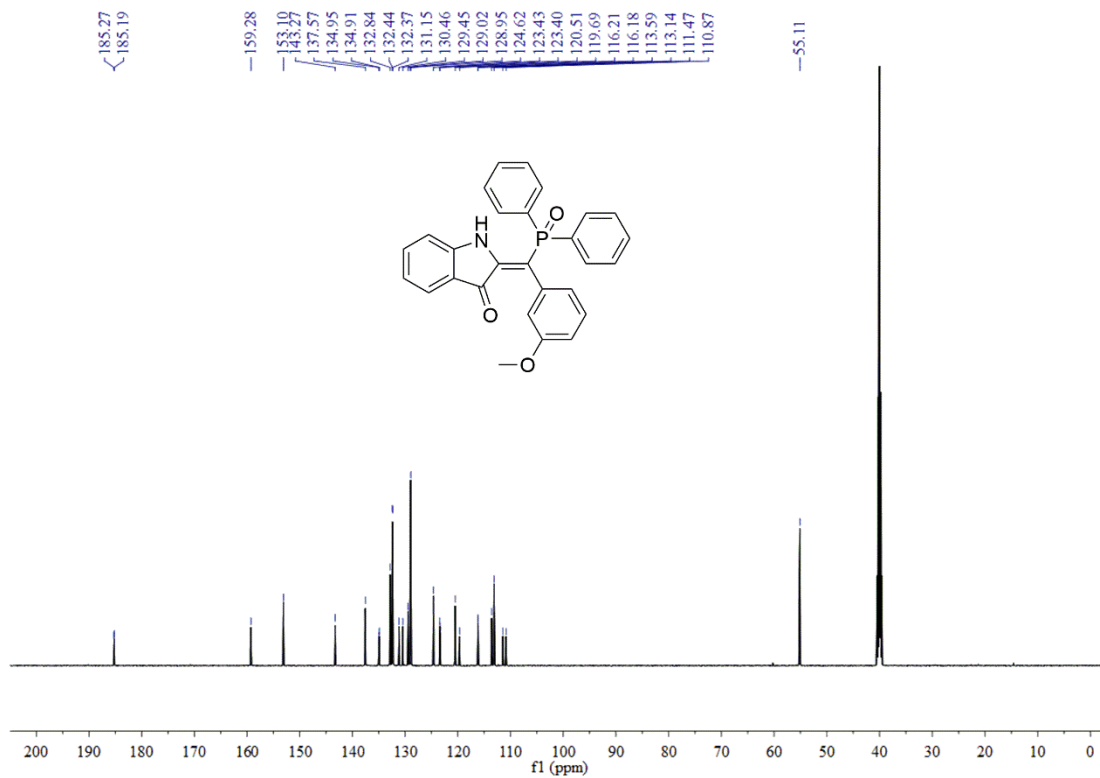

**(Z)-2-((diphenylphosphoryl)(3-methoxyphenyl)methylene)indolin-3-one (3n): <sup>31</sup>P NMR**

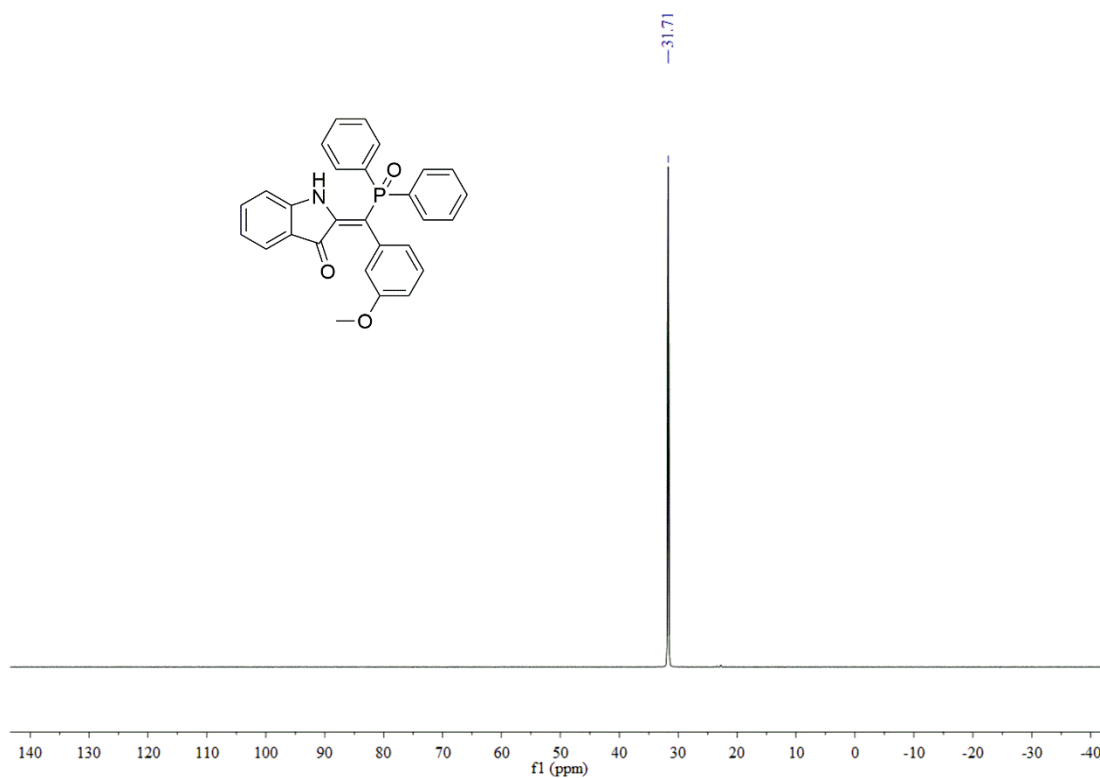

**(Z)-2-((3-chlorophenyl)(diphenylphosphoryl)methylene)indolin-3-one (3o): <sup>1</sup>H NMR**

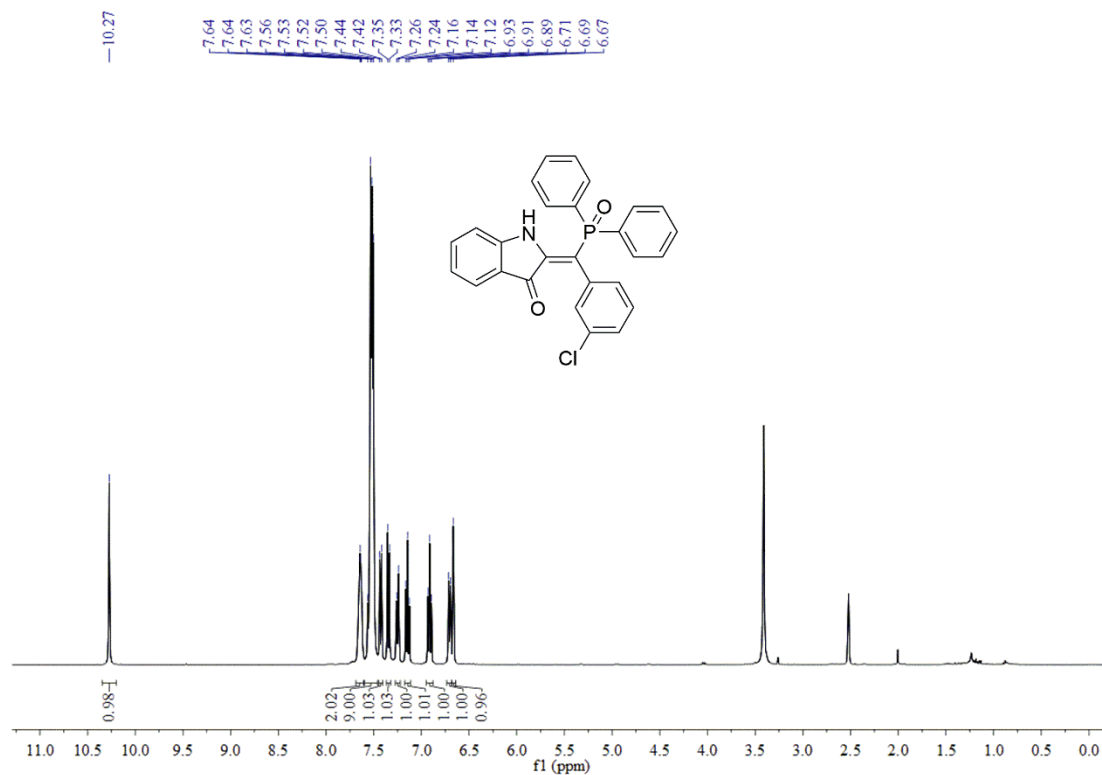

**(Z)-2-((3-chlorophenyl)(diphenylphosphoryl)methylene)indolin-3-one (3o): <sup>13</sup>C NMR**

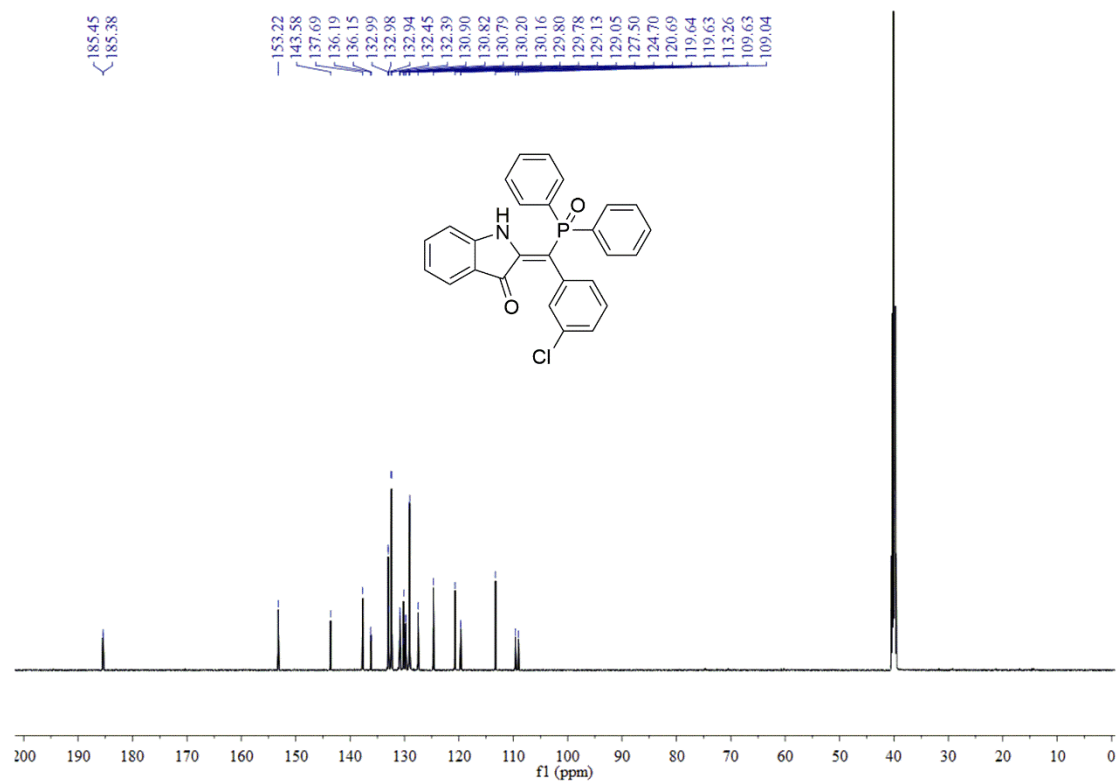

**(Z)-2-((3-chlorophenyl)(diphenylphosphoryl)methylene)indolin-3-one (3o): <sup>31</sup>P NMR**

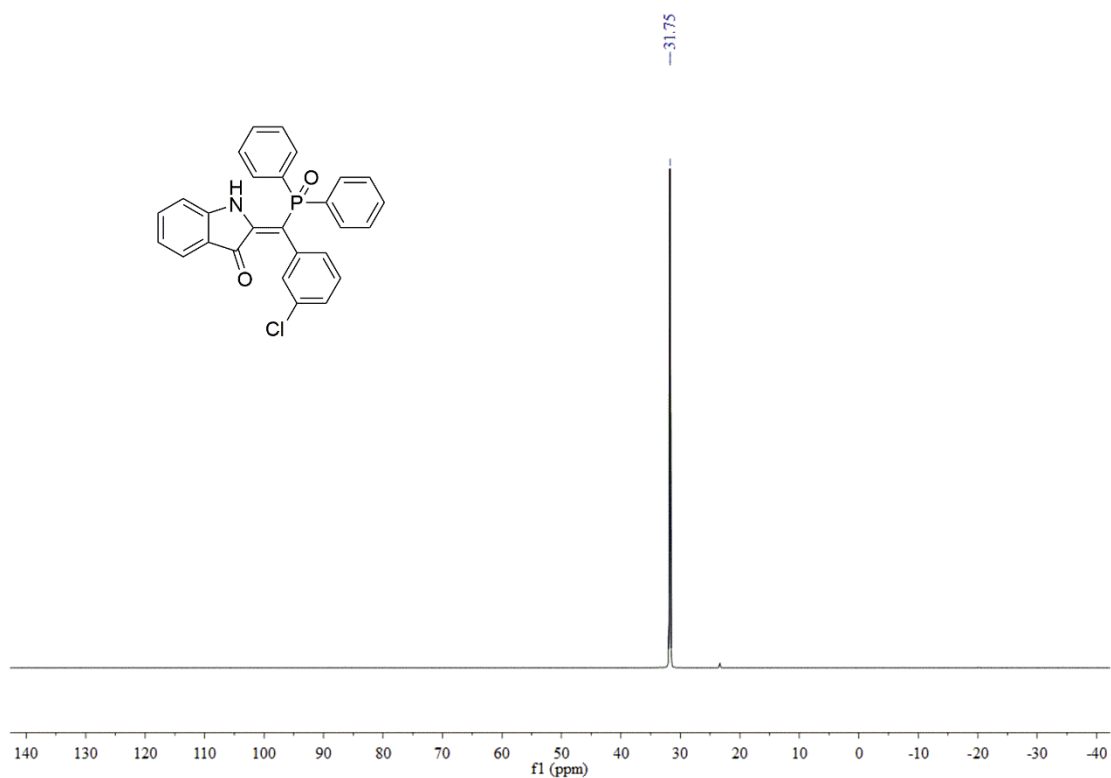

**(Z)-2-((3-bromophenyl)(diphenylphosphoryl)methylene)indolin-3-one (3p): <sup>1</sup>H NMR**

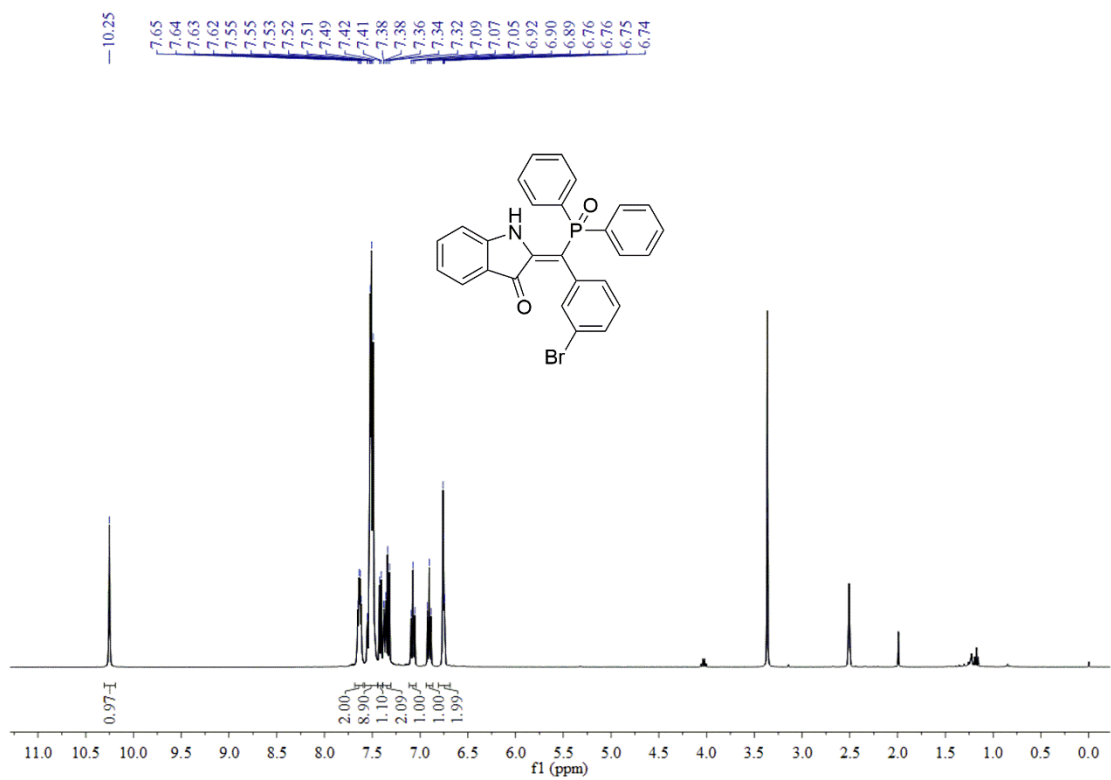

**(Z)-2-((3-bromophenyl)(diphenylphosphoryl)methylene)indolin-3-one (3p): <sup>13</sup>C NMR**

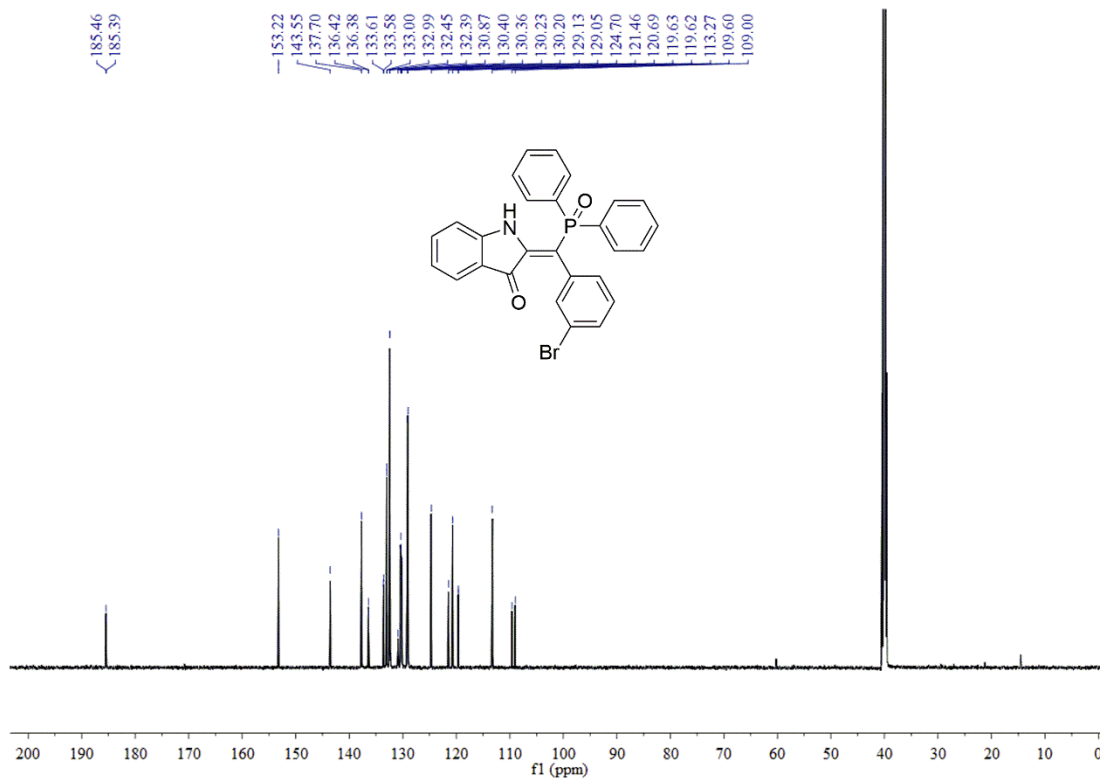

**(Z)-2-((3-bromophenyl)(diphenylphosphoryl)methylene)indolin-3-one (3p): <sup>31</sup>P NMR**

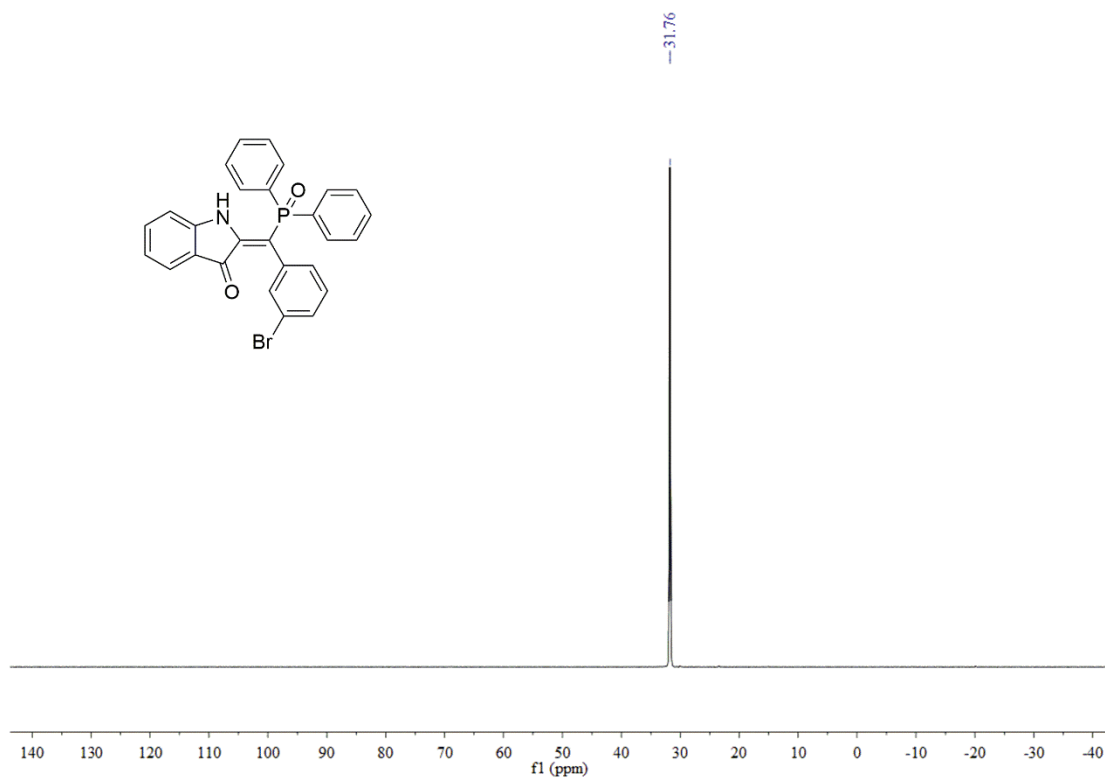

**(Z)-2-((diphenylphosphoryl)(3-iodophenyl)methylene)indolin-3-one (3q): <sup>1</sup>H NMR**

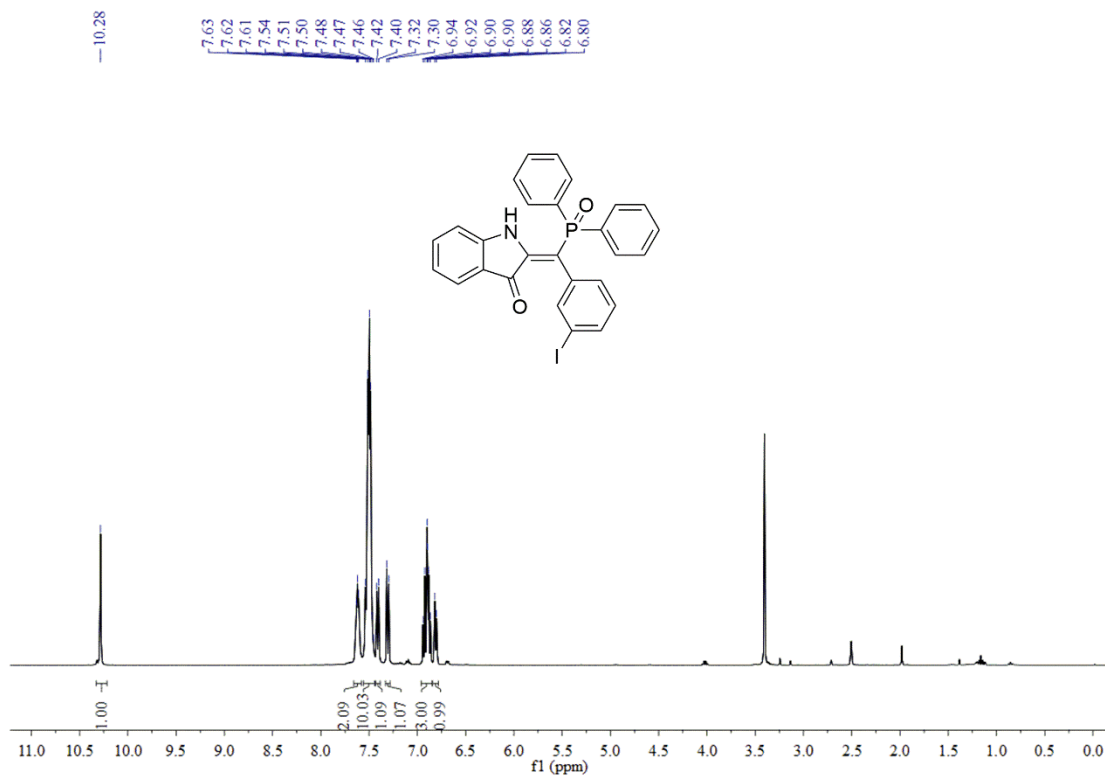

**(Z)-2-((diphenylphosphoryl)(3-iodophenyl)methylene)indolin-3-one (3q): <sup>13</sup>C NMR**

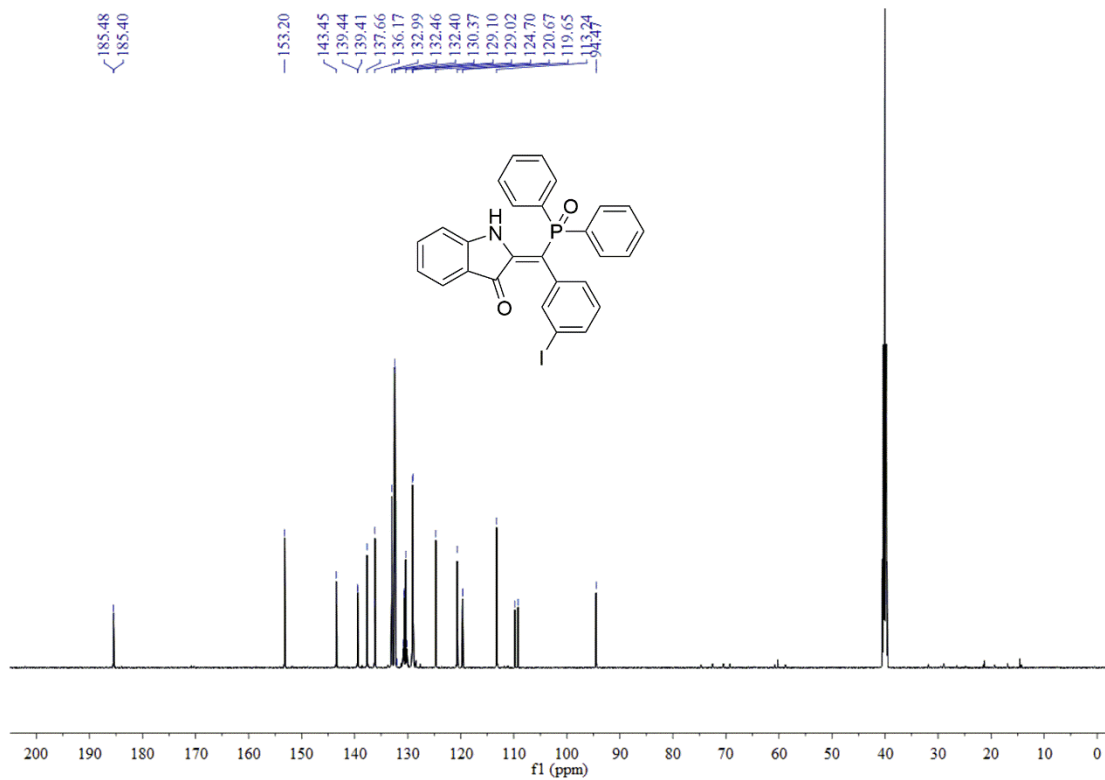

**(Z)-2-((diphenylphosphoryl)(3-iodophenyl)methylene)indolin-3-one (3q): <sup>31</sup>P NMR**

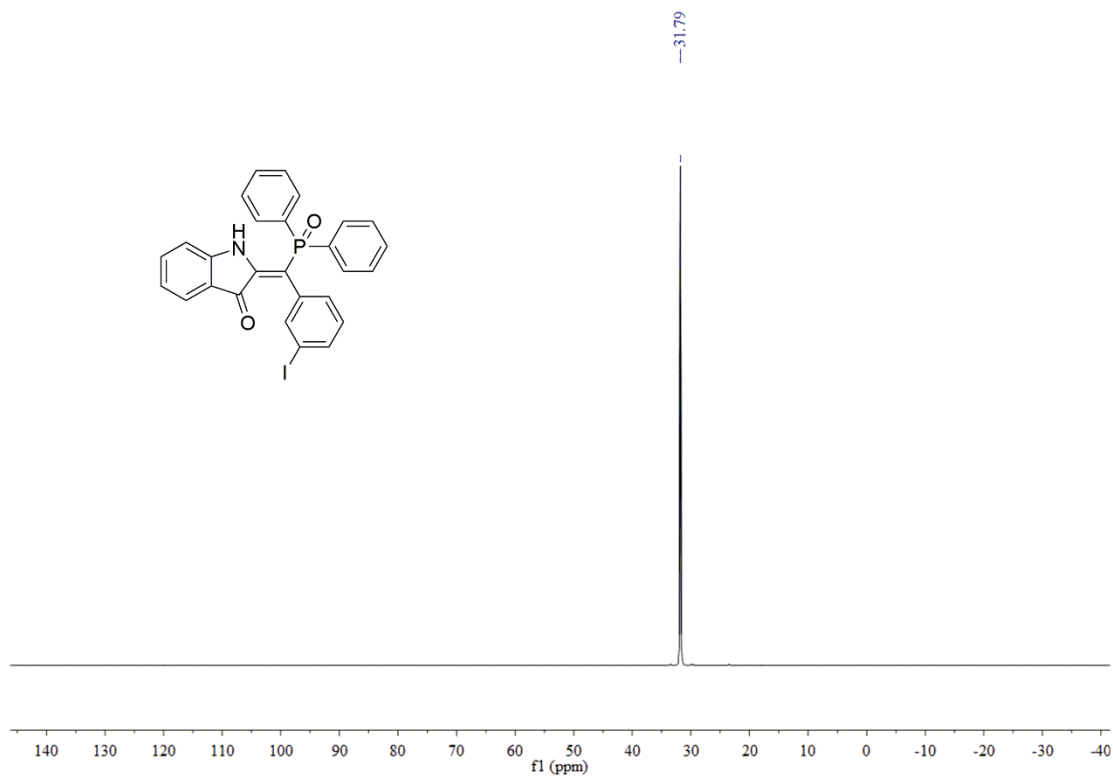

**(Z)-2-((diphenylphosphoryl)(3-nitrophenyl)methylene)indolin-3-one (3r): <sup>1</sup>H NMR**

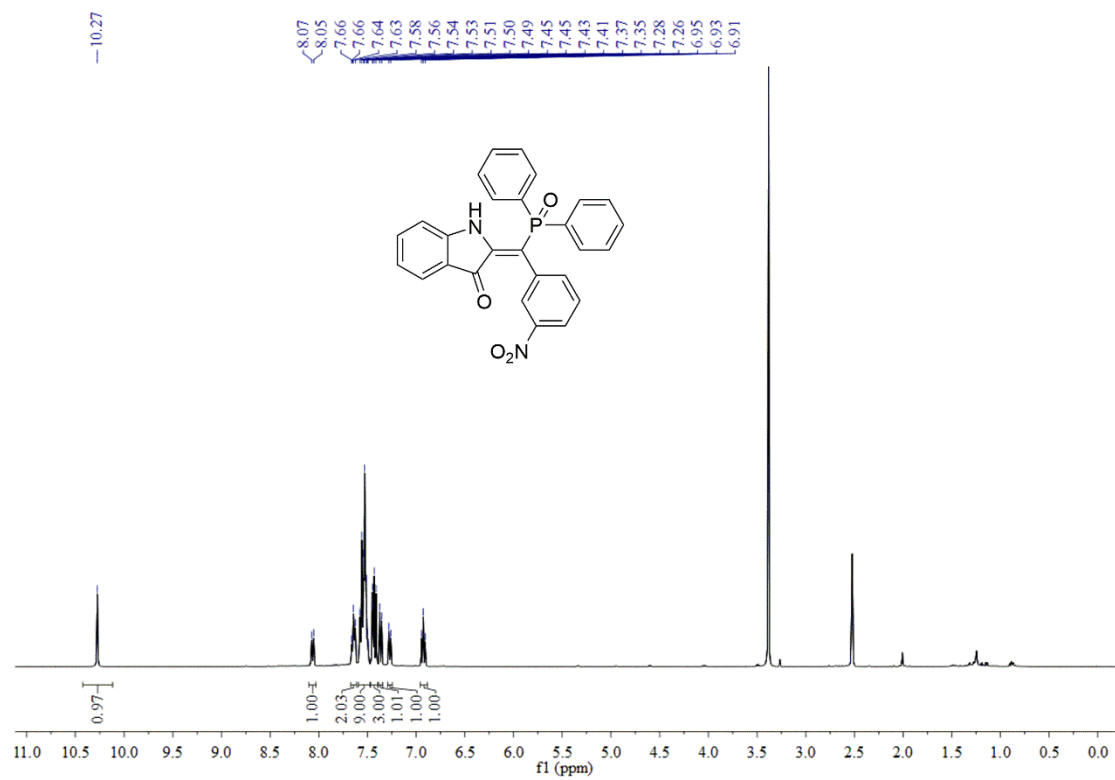



**(Z)-2-((diphenylphosphoryl)(3-nitrophenyl)methylene)indolin-3-one (3r): <sup>13</sup>C NMR**

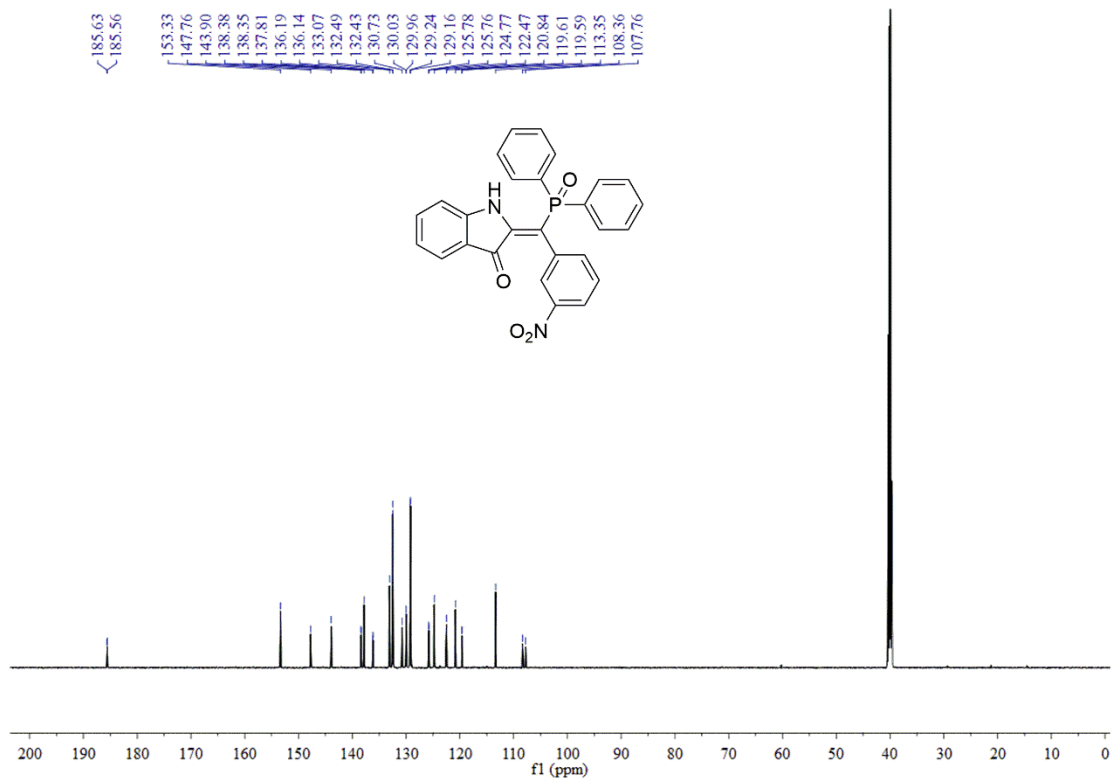

**(Z)-2-((diphenylphosphoryl)(3-nitrophenyl)methylene)indolin-3-one (3r): <sup>31</sup>P NMR**

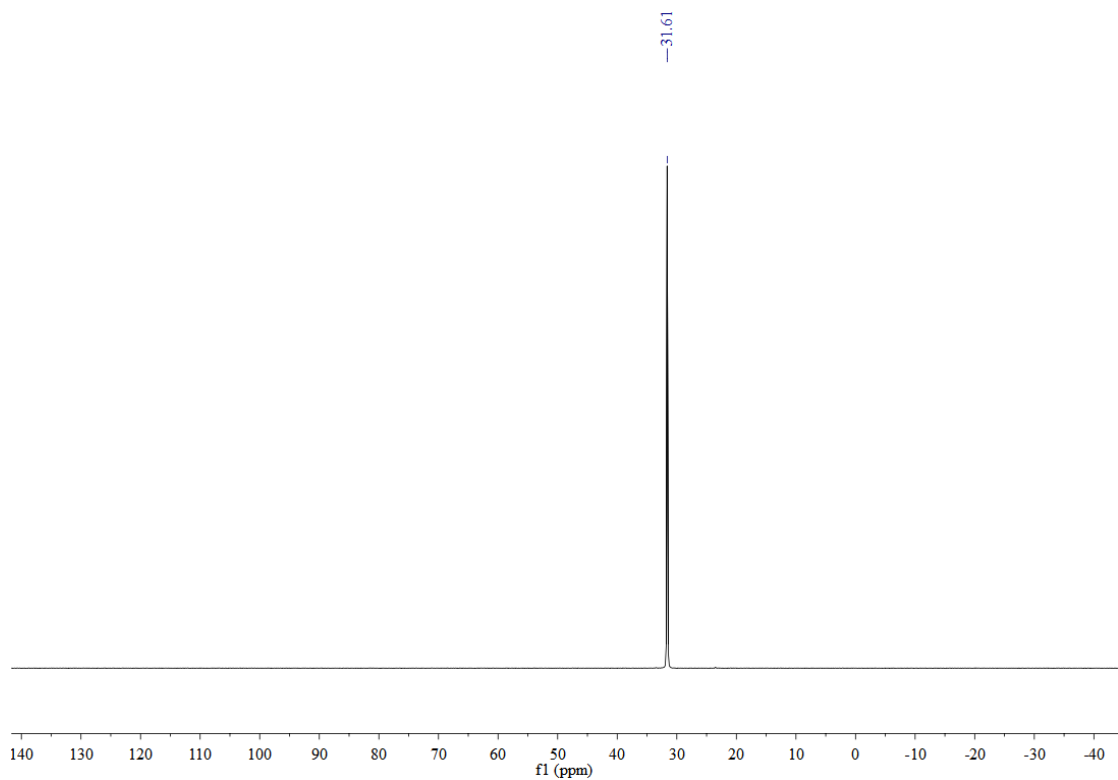

**(Z)-2-((diphenylphosphoryl)(o-tolyl)methylene)indolin-3-one (3s): <sup>1</sup>H NMR**

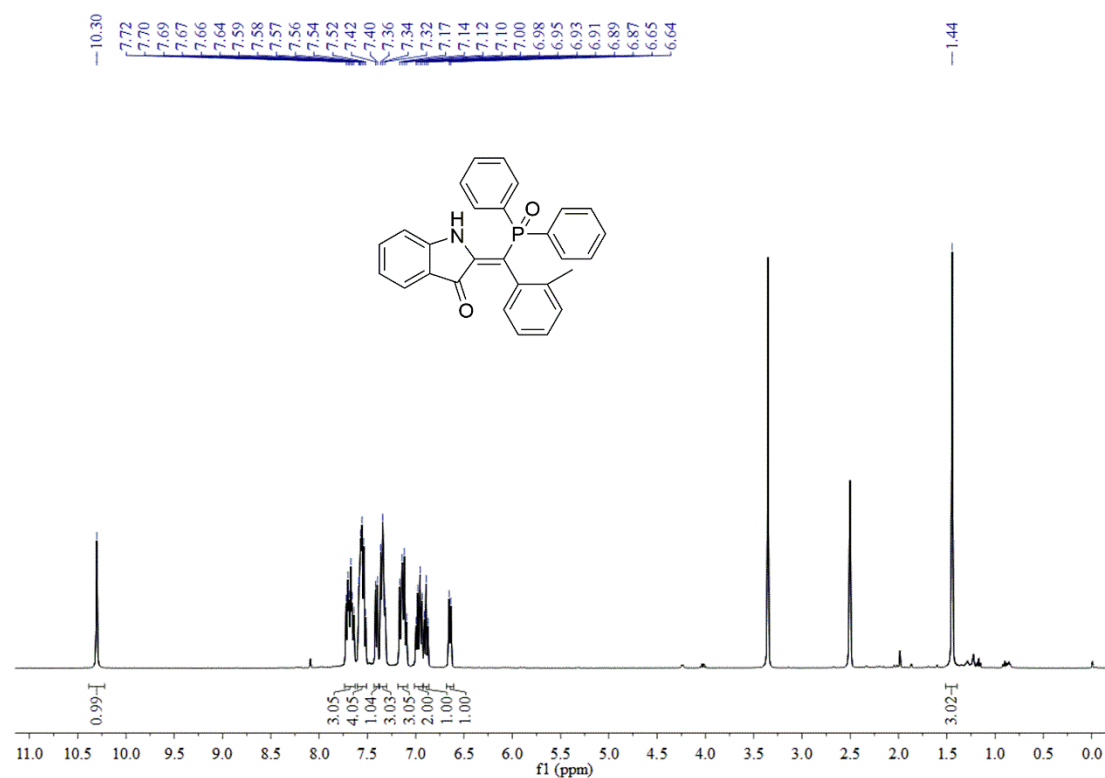

**(Z)-2-((diphenylphosphoryl)(o-tolyl)methylene)indolin-3-one (3s): <sup>13</sup>C NMR**

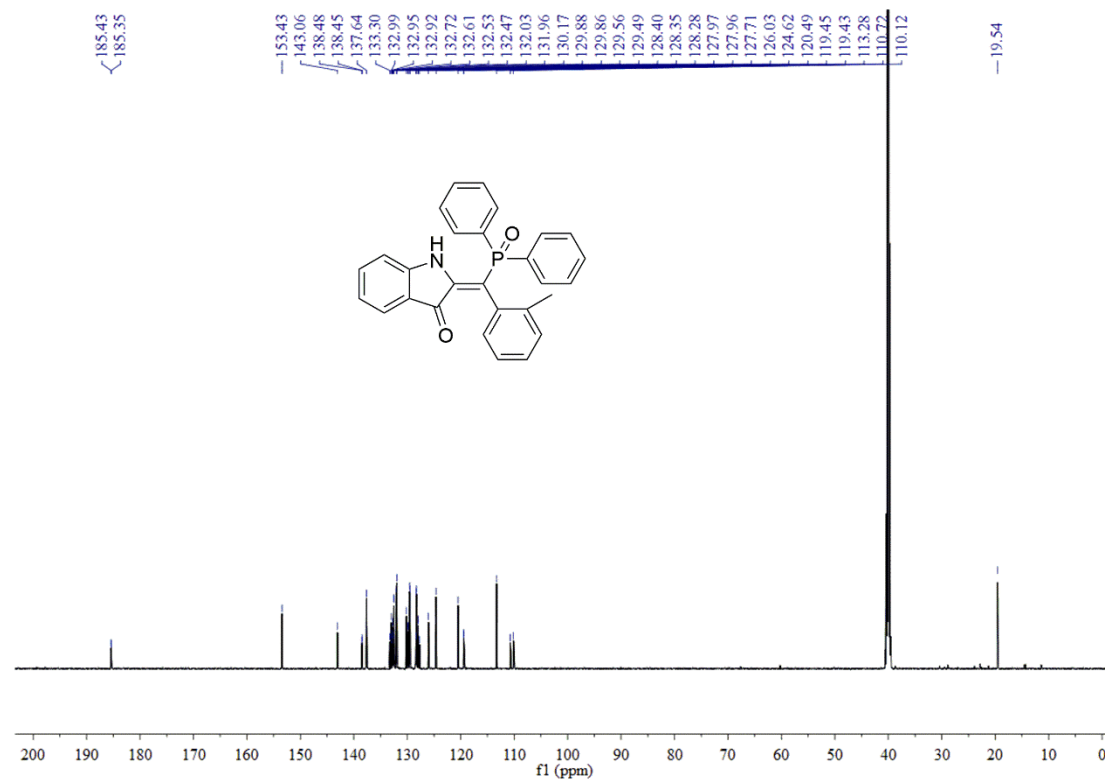

**(Z)-2-((diphenylphosphoryl)(o-tolyl)methylene)indolin-3-one (3s): <sup>31</sup>P NMR**

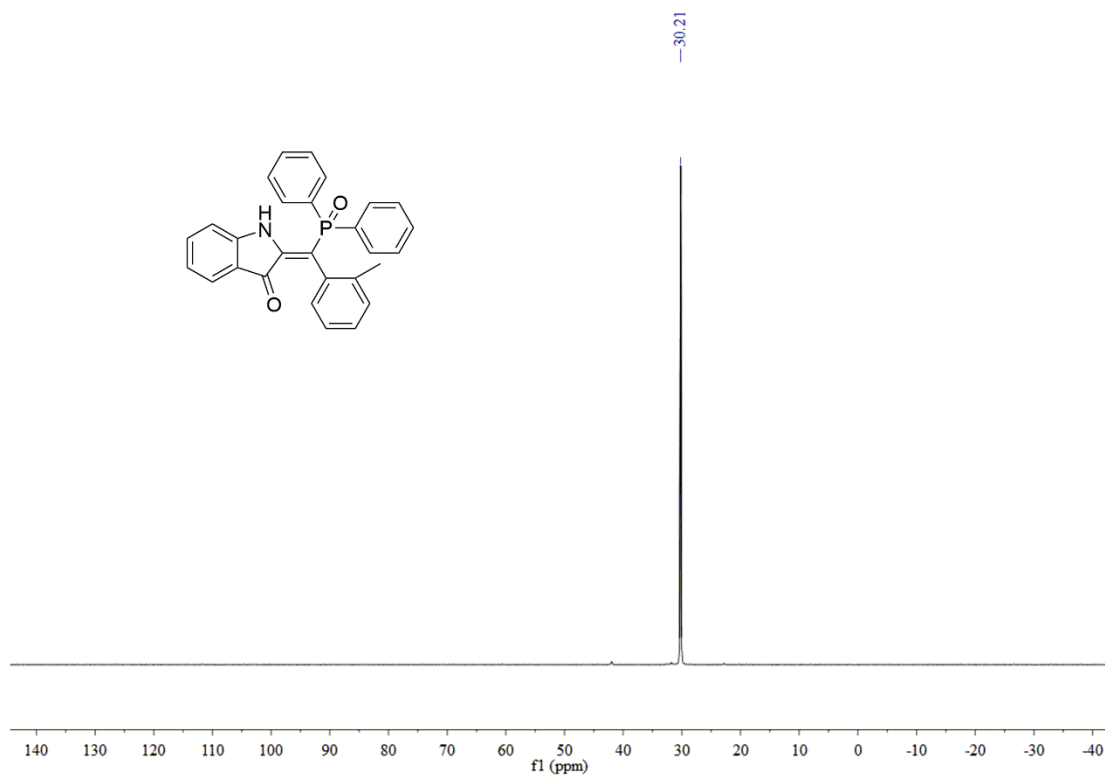

**(Z)-2-((diphenylphosphoryl)(2-methoxyphenyl)methylene)indolin-3-one (3t): <sup>1</sup>H NMR**

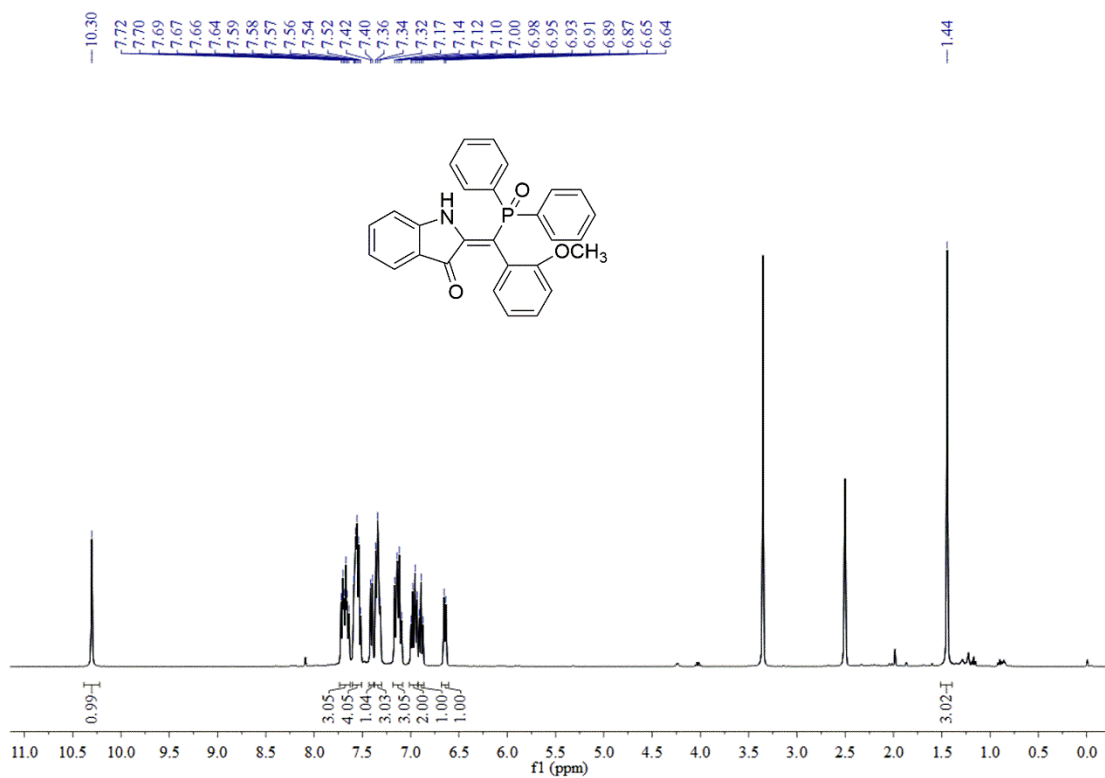

**(Z)-2-((diphenylphosphoryl)(2-methoxyphenyl)methylene)indolin-3-one (3t): <sup>13</sup>C NMR**

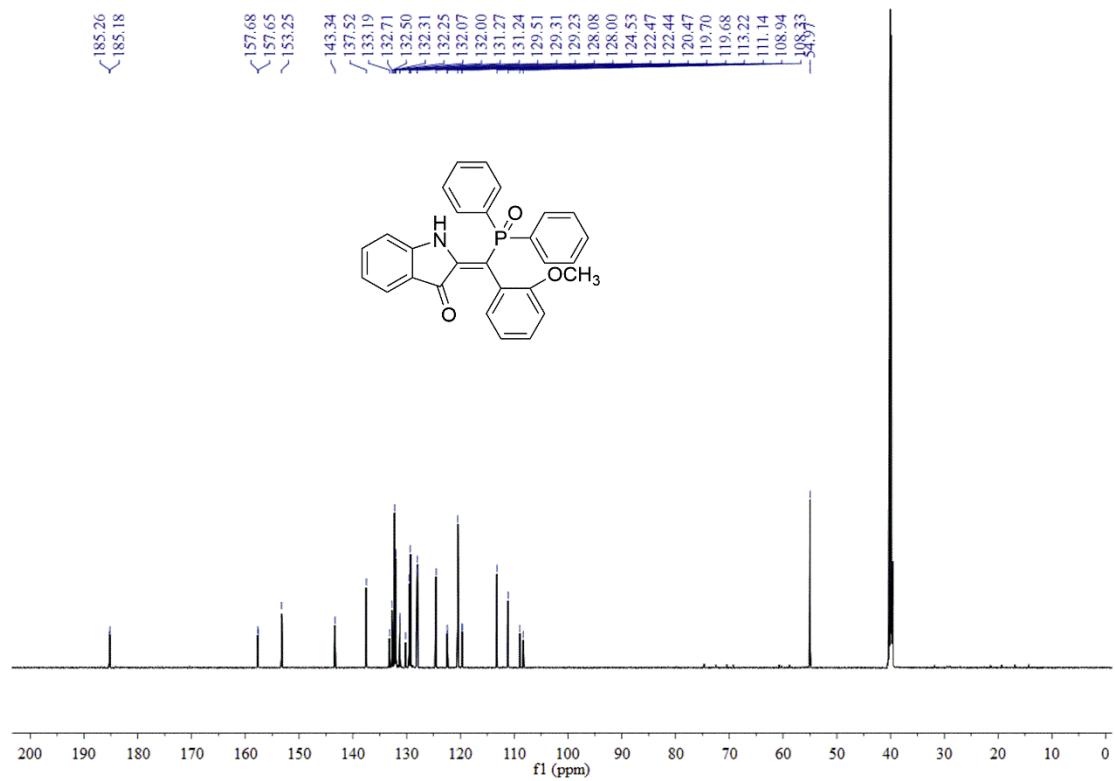

**(Z)-2-((diphenylphosphoryl)(2-methoxyphenyl)methylene)indolin-3-one (3t): <sup>31</sup>P NMR**

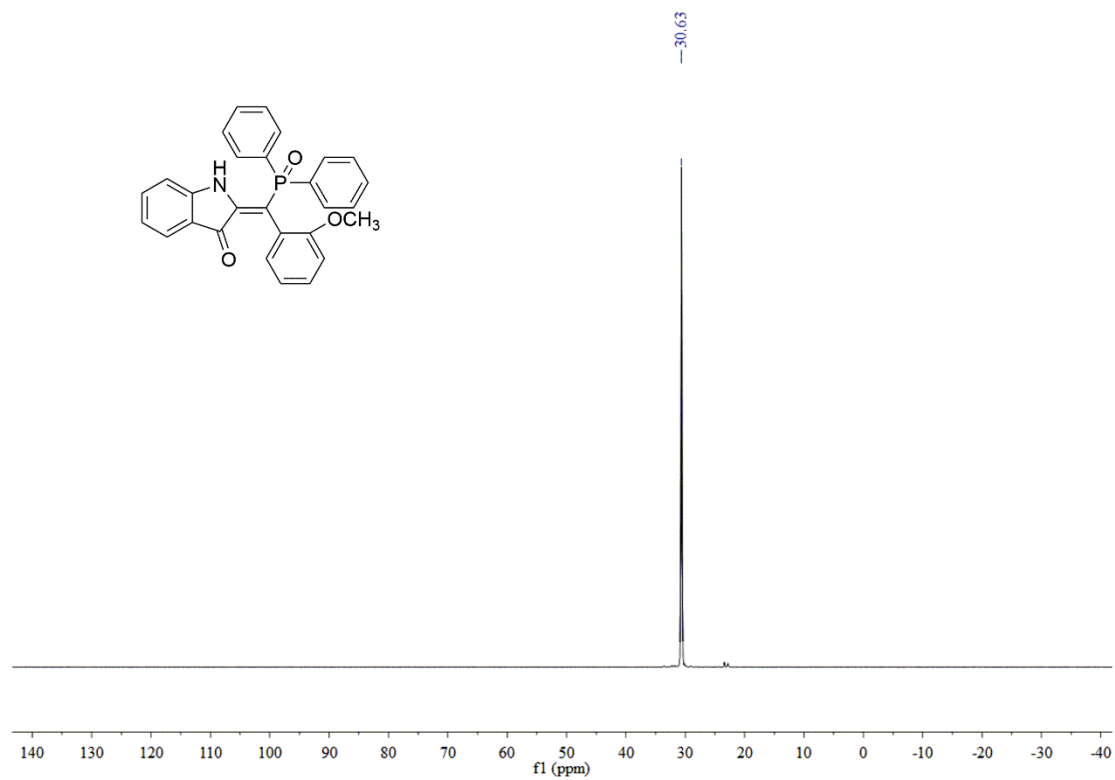

**(Z)-2-((2-chlorophenyl)(diphenylphosphoryl)methylene)indolin-3-one (3u): <sup>1</sup>H NMR**

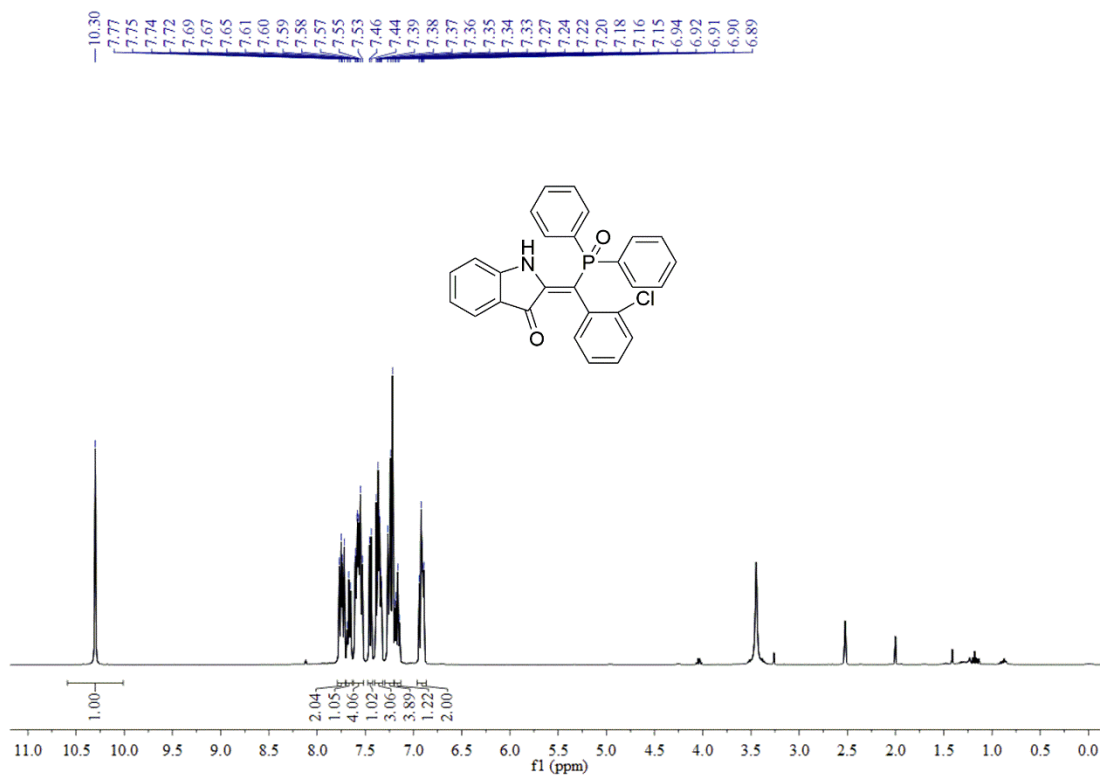

**(Z)-2-((2-chlorophenyl)(diphenylphosphoryl)methylene)indolin-3-one (3u): <sup>13</sup>C NMR**

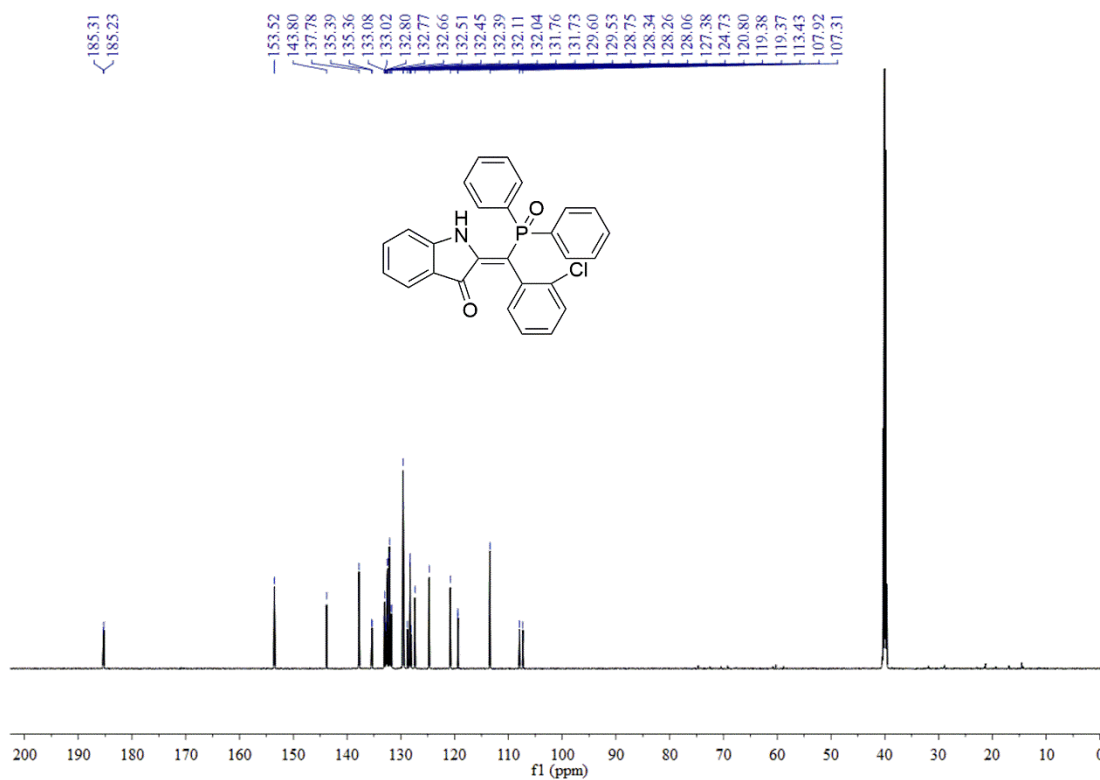

**(Z)-2-((2-chlorophenyl)(diphenylphosphoryl)methylene)indolin-3-one (3u): <sup>31</sup>P NMR**

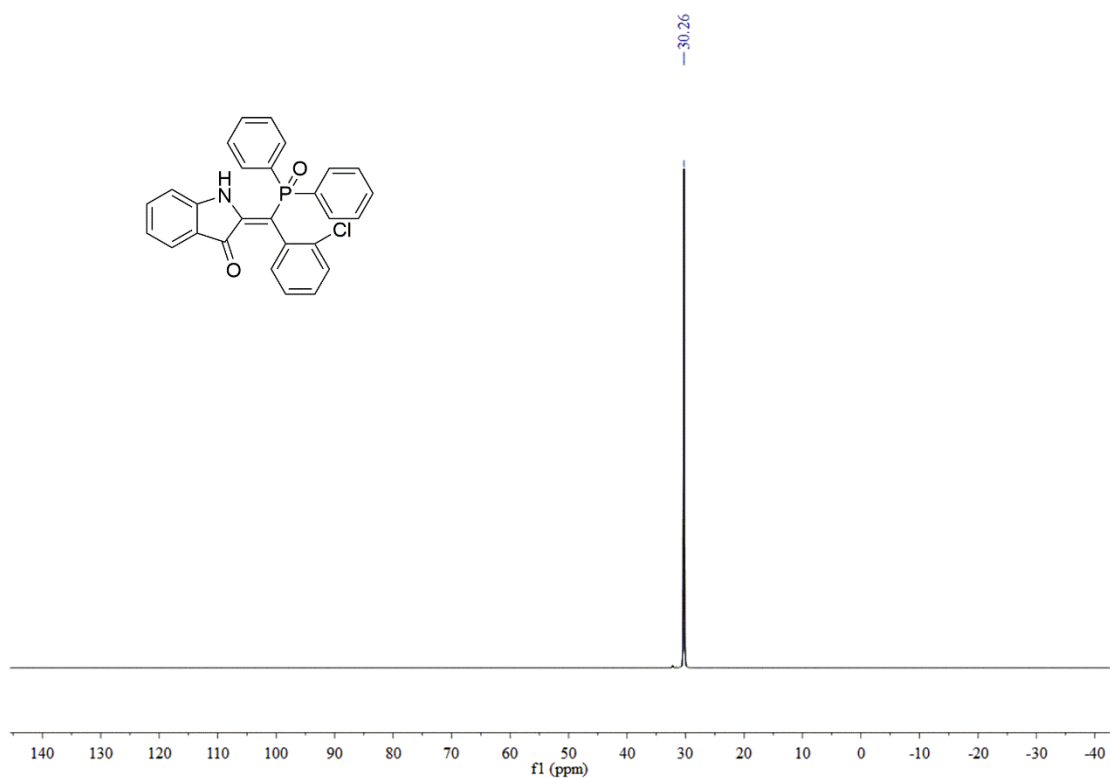

**(Z)-2-((2-bromophenyl)(diphenylphosphoryl)methylene)indolin-3-one (3v): <sup>1</sup>H NMR**

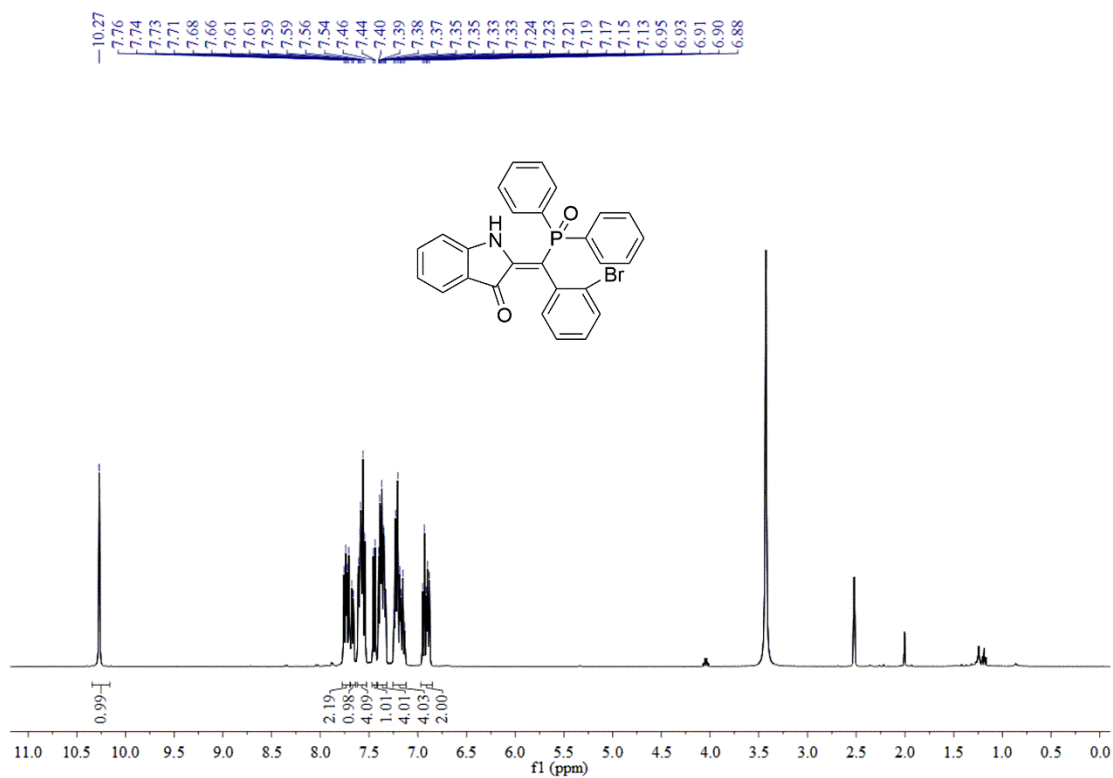

**(Z)-2-((2-bromophenyl)(diphenylphosphoryl)methylene)indolin-3-one (3v): <sup>13</sup>C NMR**

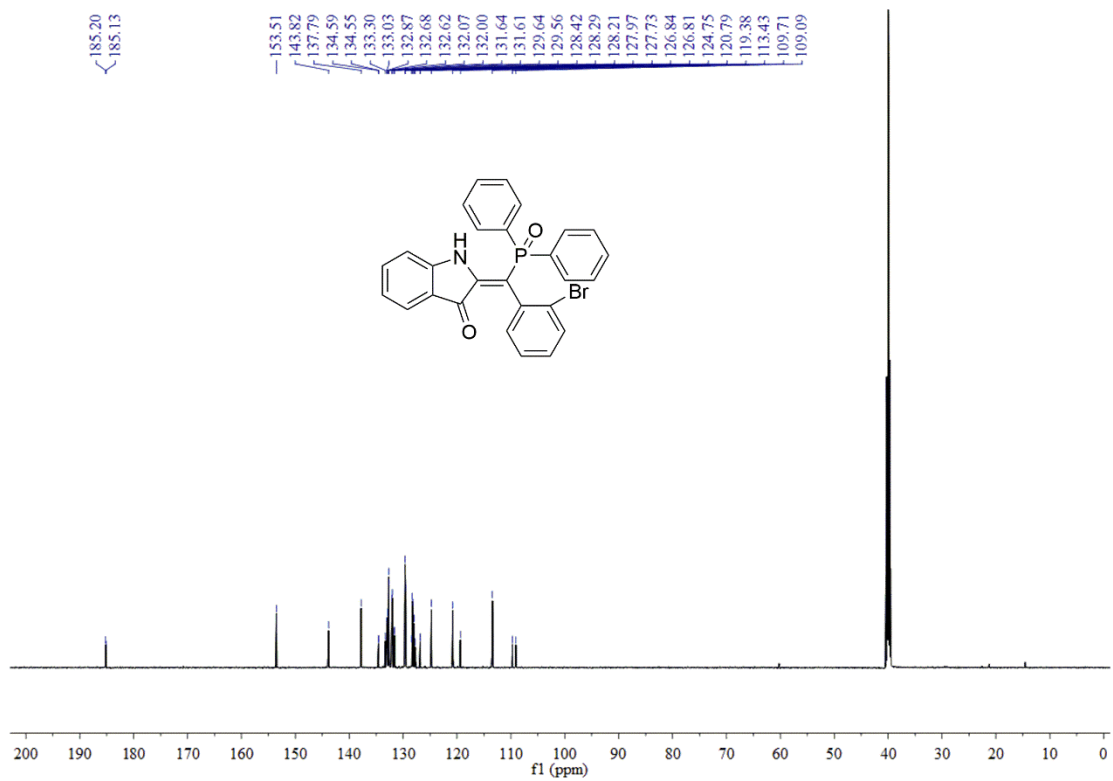

**(Z)-2-((2-bromophenyl)(diphenylphosphoryl)methylene)indolin-3-one (3v): <sup>31</sup>P NMR**

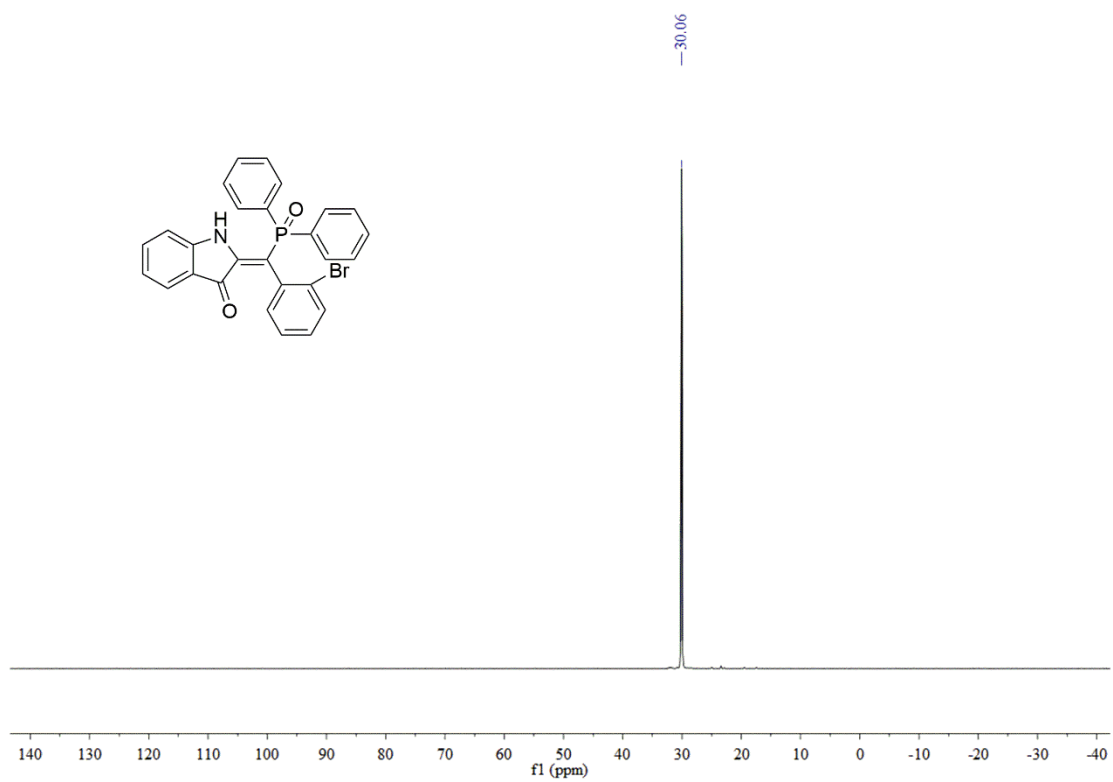

**(Z)-2-((3,4-dimethoxyphenyl)(diphenylphosphoryl)methylene)indolin-3-one (3x): <sup>1</sup>H NMR**

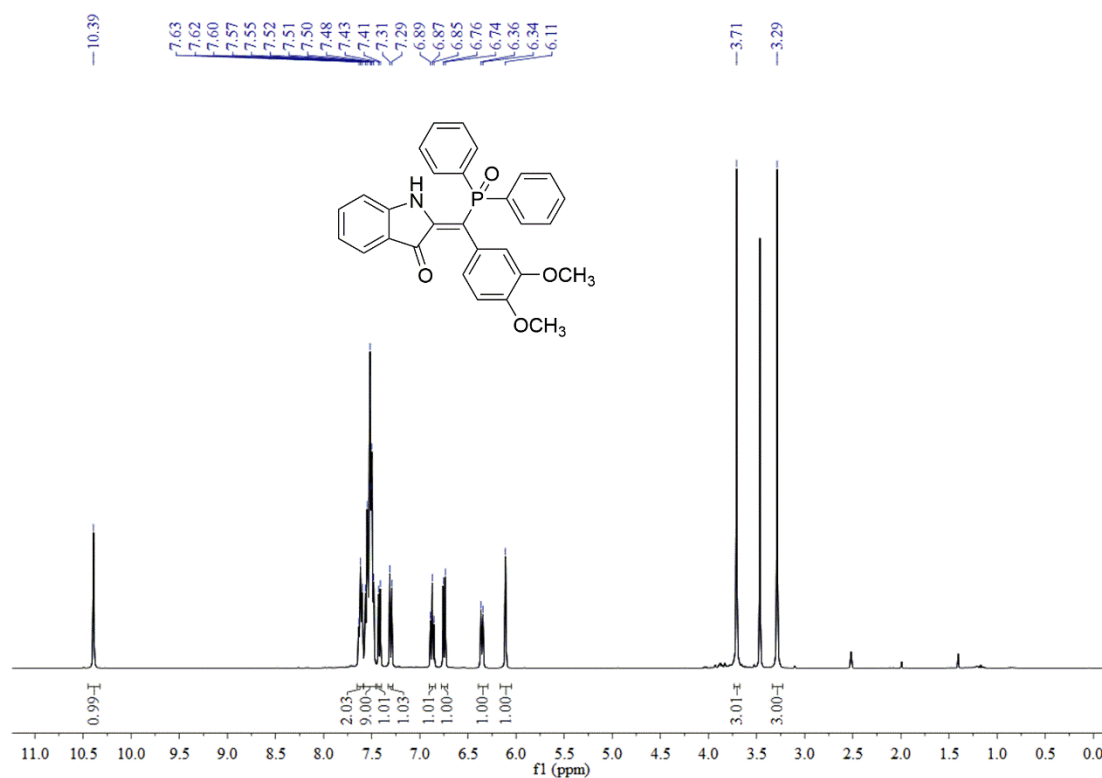

**(Z)-2-((3,4-dimethoxyphenyl)(diphenylphosphoryl)methylene)indolin-3-one (3x): <sup>13</sup>C NMR**

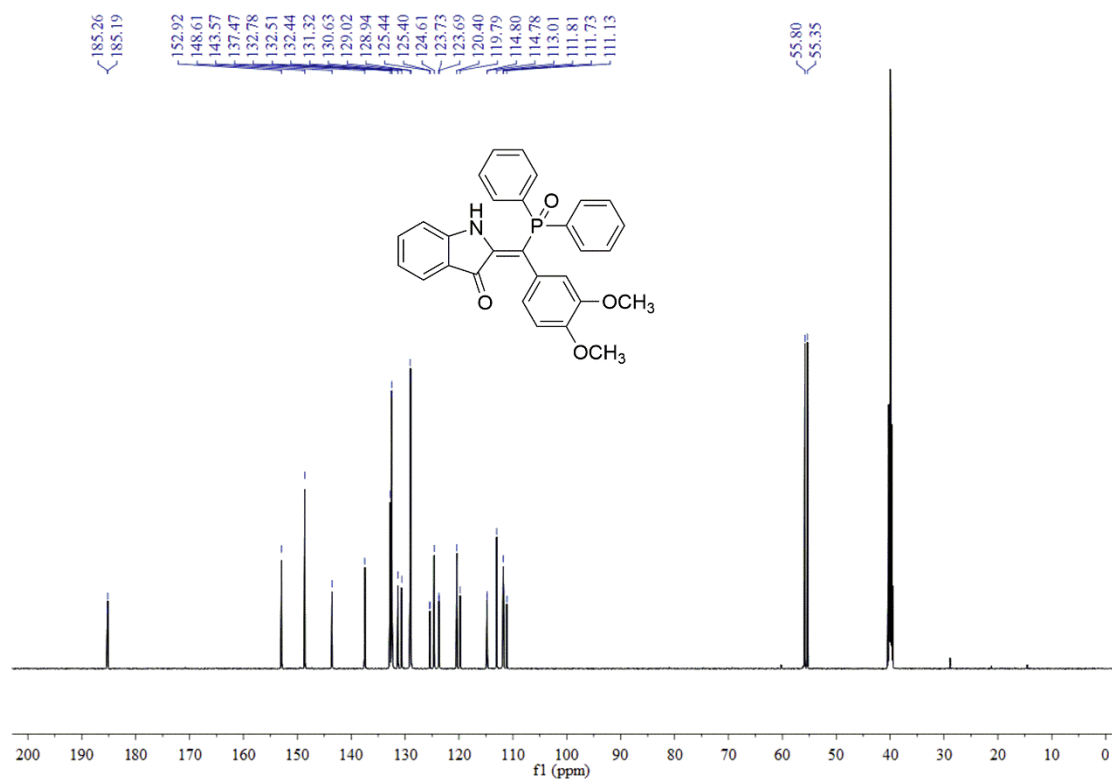



**(Z)-2-((3,4-dimethoxyphenyl)(diphenylphosphoryl)methylene)indolin-3-one (3x): <sup>31</sup>P NMR**

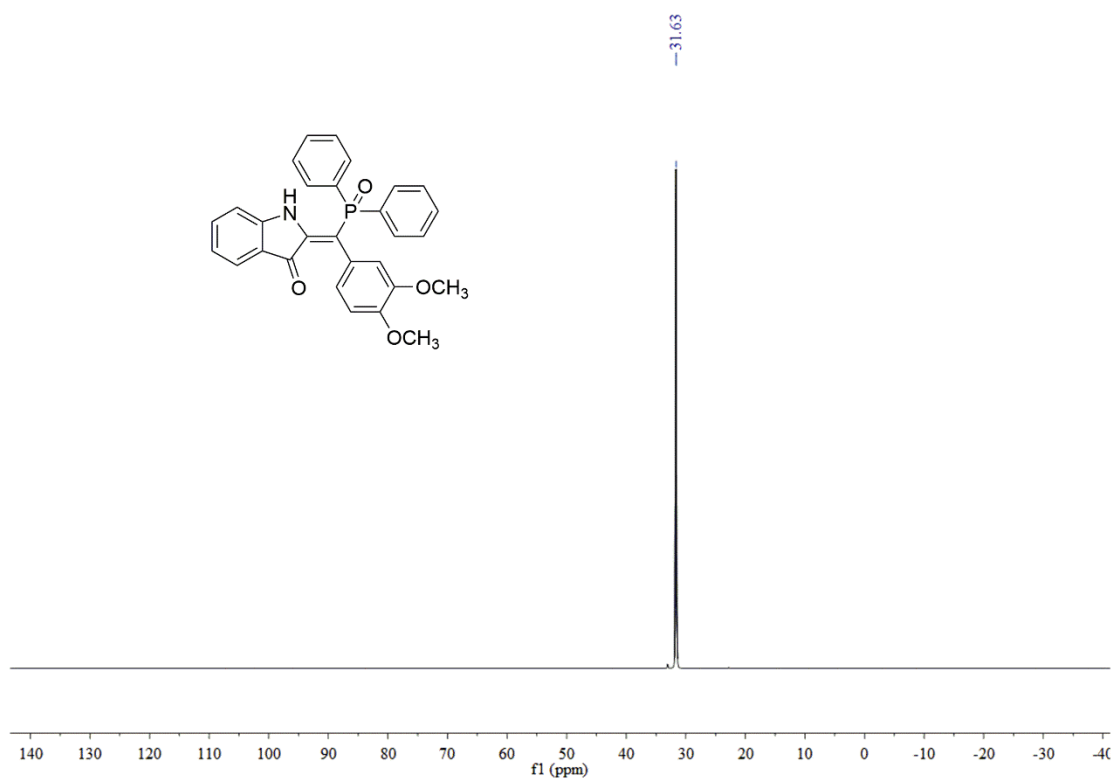

**(Z)-2-((diphenylphosphoryl)(naphthalen-2-yl)methylene)indolin-3-one (3y): <sup>1</sup>H NMR**

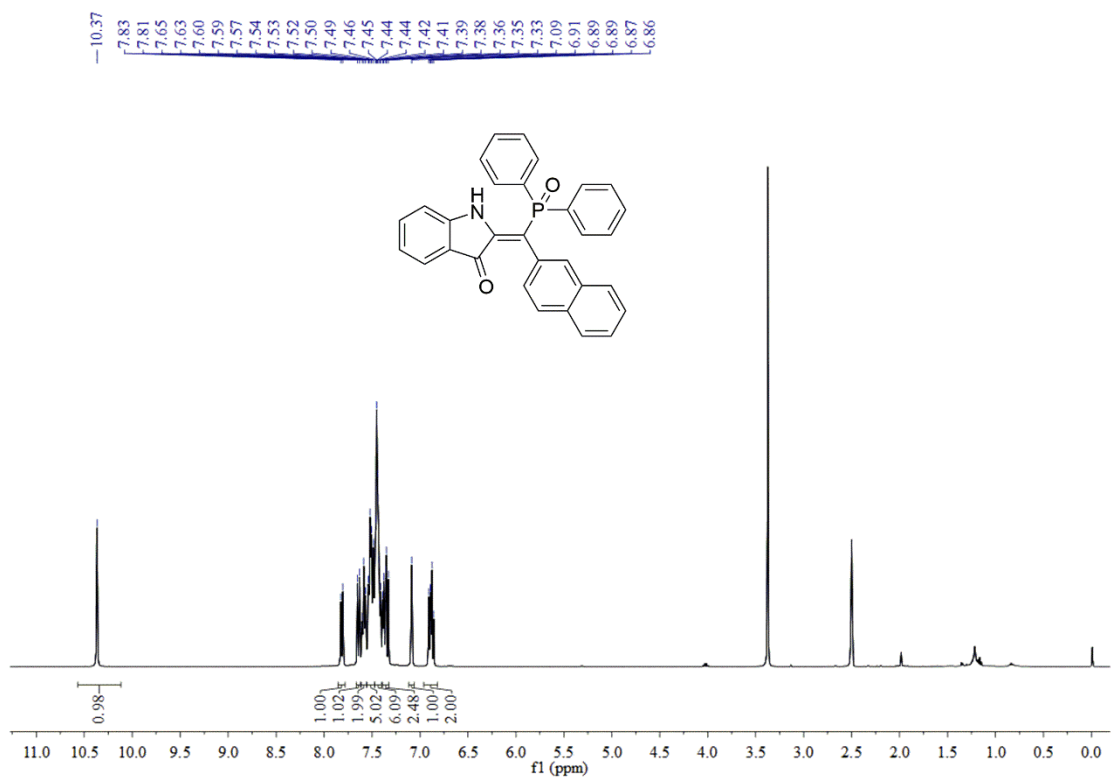

**(Z)-2-((diphenylphosphoryl)(naphthalen-2-yl)methylene)indolin-3-one (3y): <sup>13</sup>C NMR**

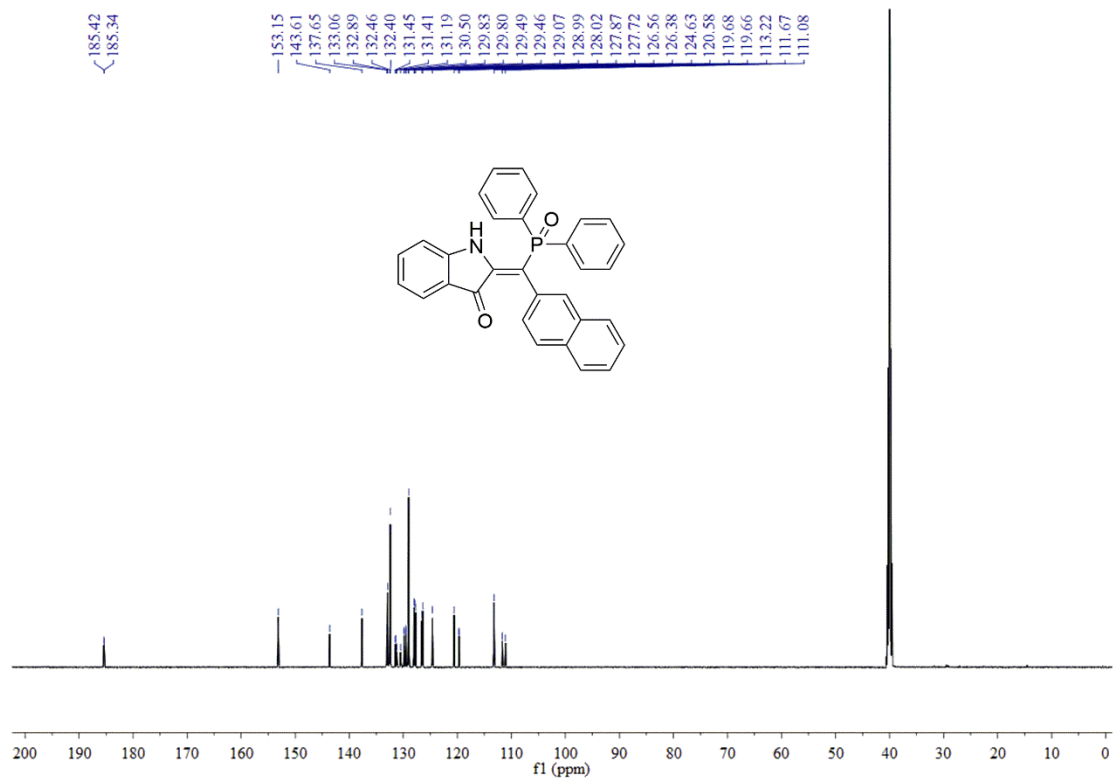

**(Z)-2-((diphenylphosphoryl)(naphthalen-2-yl)methylene)indolin-3-one (3y): <sup>31</sup>P NMR**

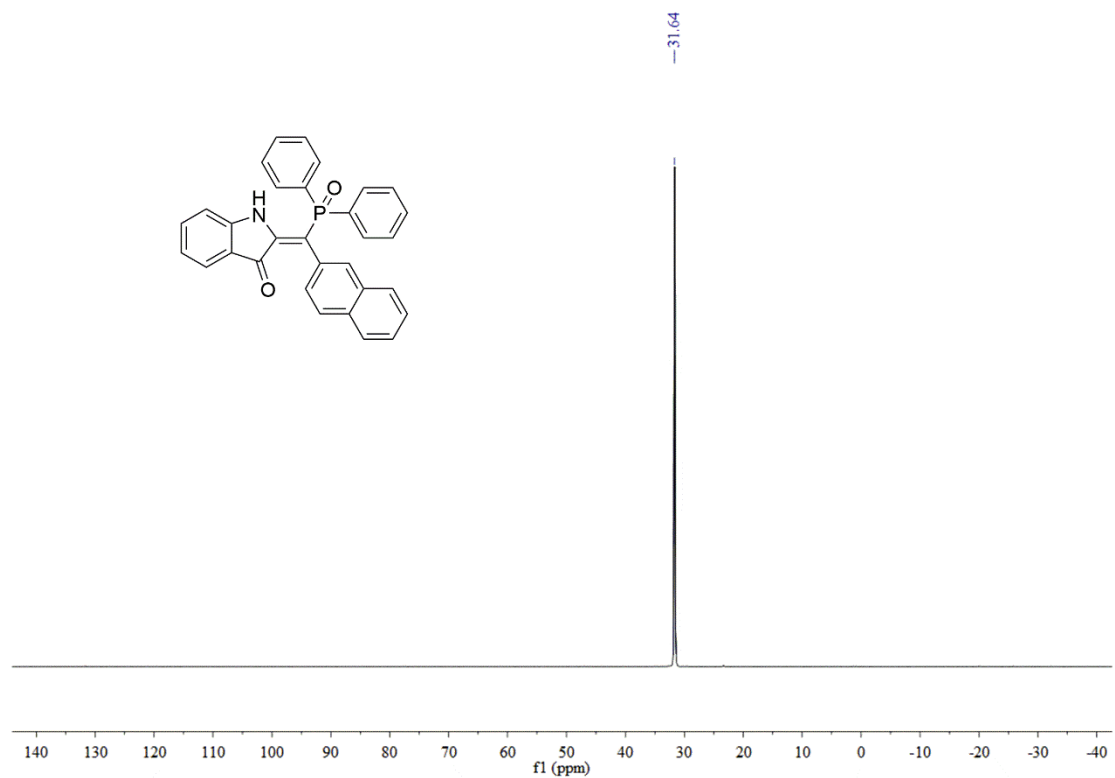

**(Z)-2-((diphenylphosphoryl)(thiophen-2-yl)methylene)indolin-3-one (3z): <sup>1</sup>H NMR**

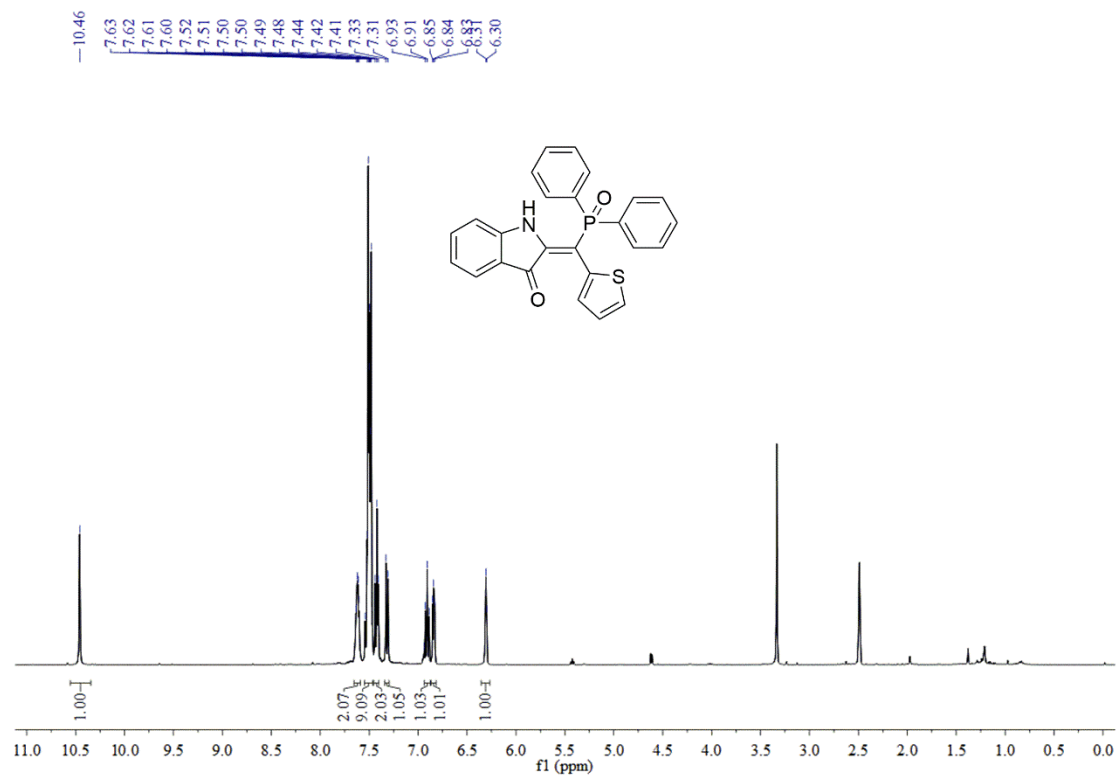

**(Z)-2-((diphenylphosphoryl)(thiophen-2-yl)methylene)indolin-3-one (3z): <sup>13</sup>C NMR**

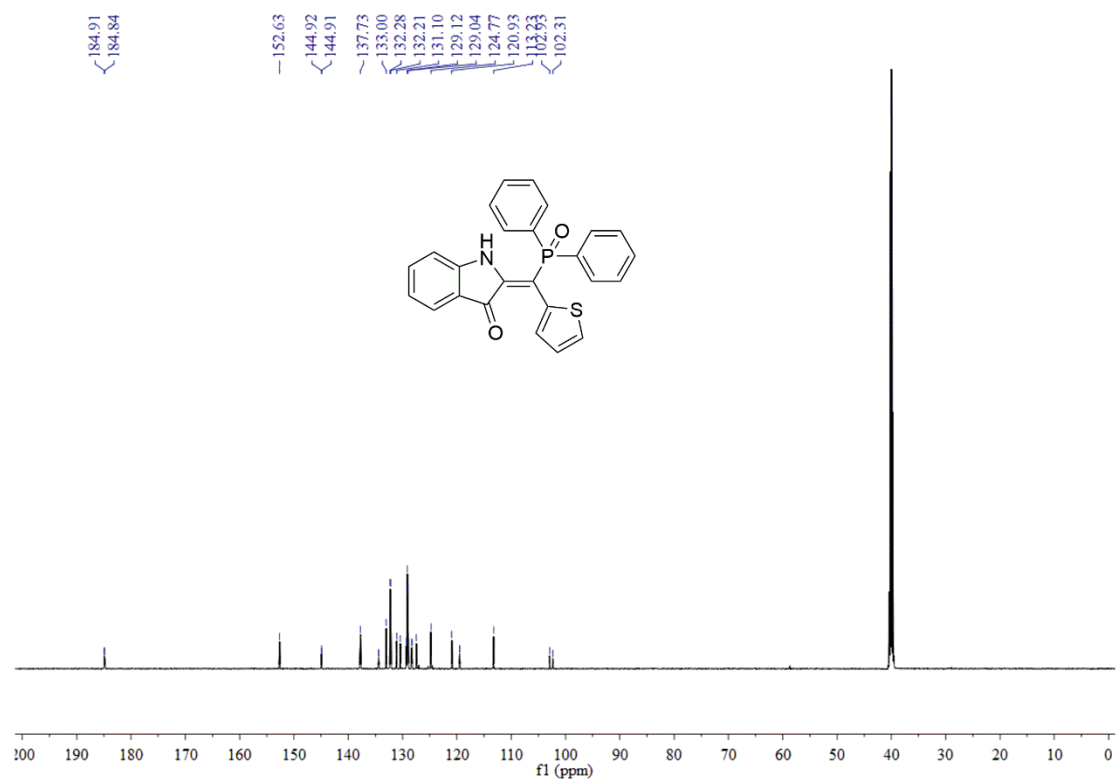

**(Z)-2-((diphenylphosphoryl)(thiophen-2-yl)methylene)indolin-3-one (3z): <sup>31</sup>P NMR**

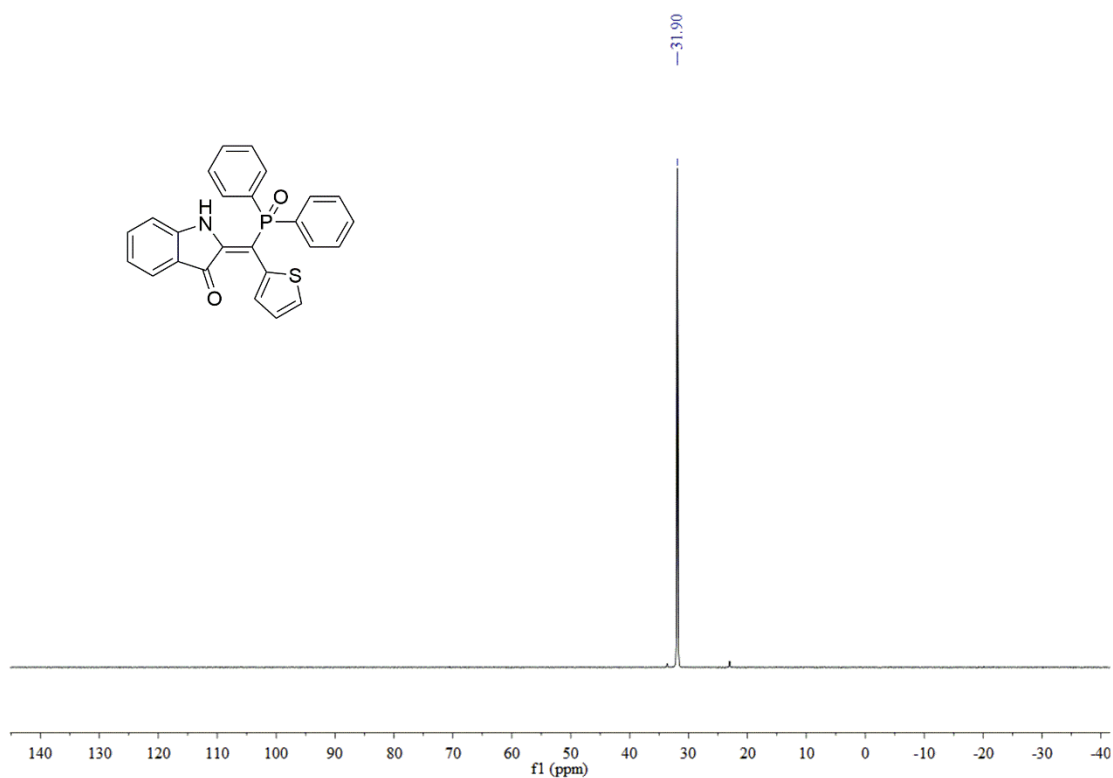

**(Z)-2-((diphenylphosphoryl)(phenyl)methylene)-5,6-dimethoxyindolin-3-one (4a): <sup>1</sup>H NMR**

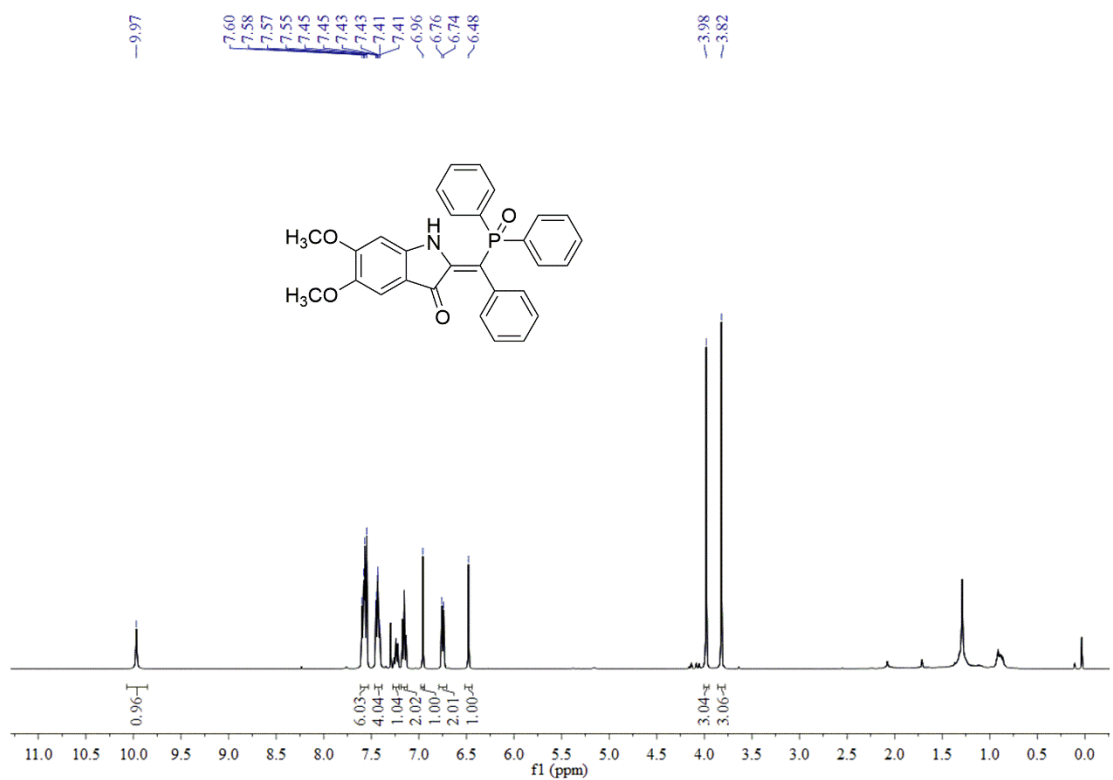

**(Z)-2-((diphenylphosphoryl)(phenyl)methylene)-5,6-dimethoxyindolin-3-one (4a): <sup>13</sup>C NMR**

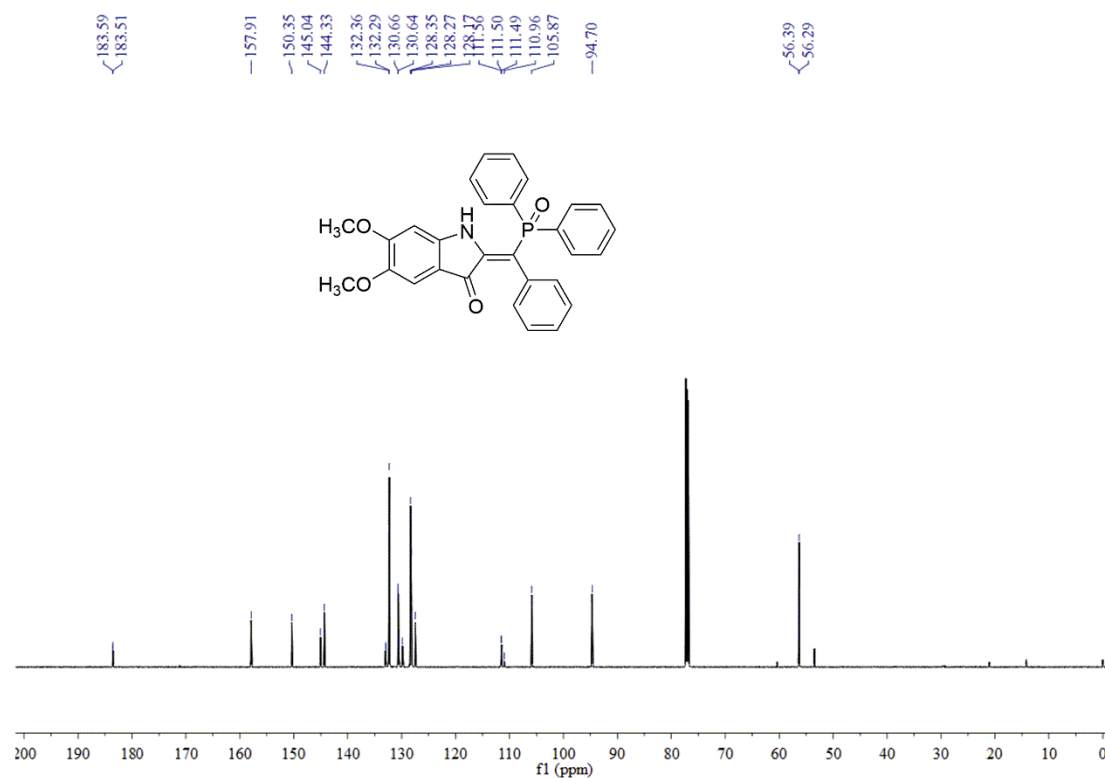

**(Z)-2-((diphenylphosphoryl)(phenyl)methylene)-5,6-dimethoxyindolin-3-one (4a): <sup>31</sup>P NMR**

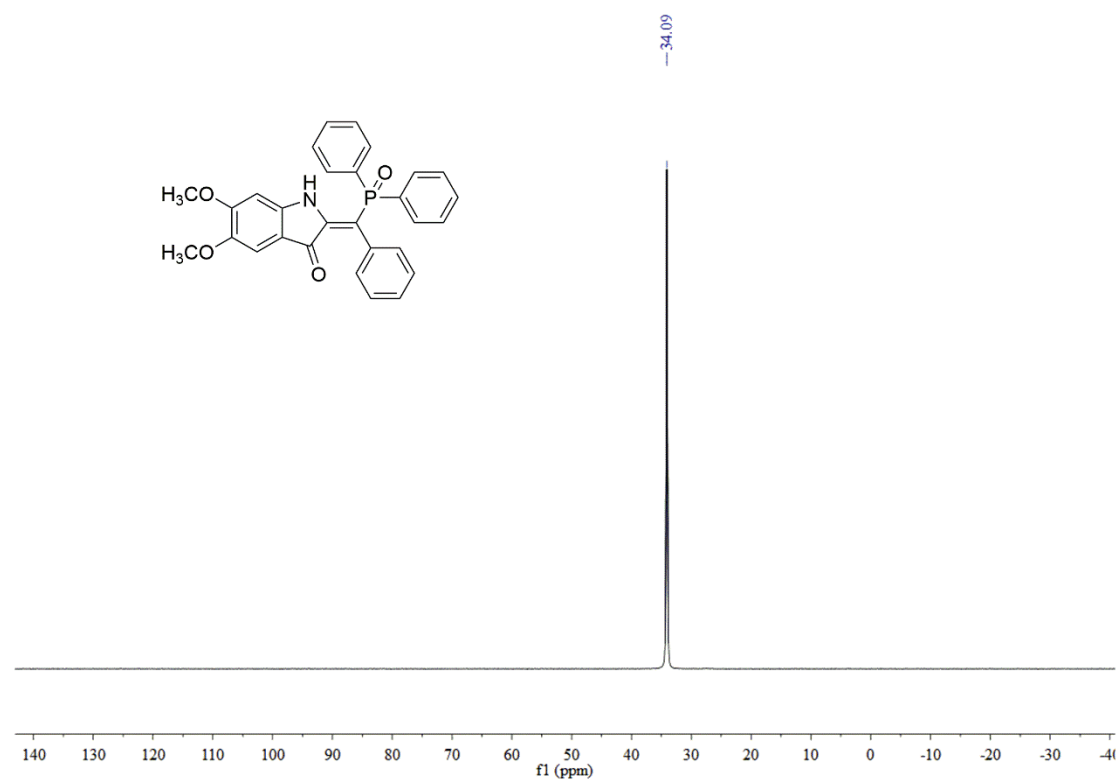

**(Z)-5-bromo-2-((diphenylphosphoryl)(phenyl)methylene)indolin-3-one (4b): <sup>1</sup>H NMR**

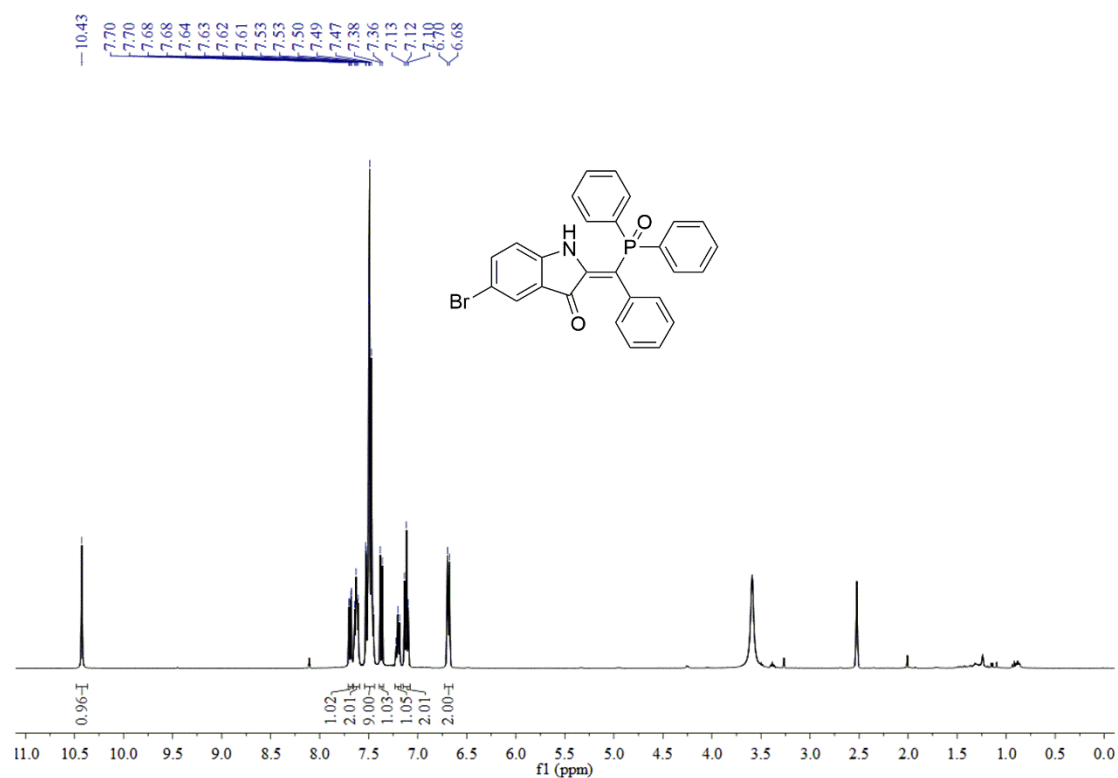

**(Z)-5-bromo-2-((diphenylphosphoryl)(phenyl)methylene)indolin-3-one (4b): <sup>13</sup>C NMR**

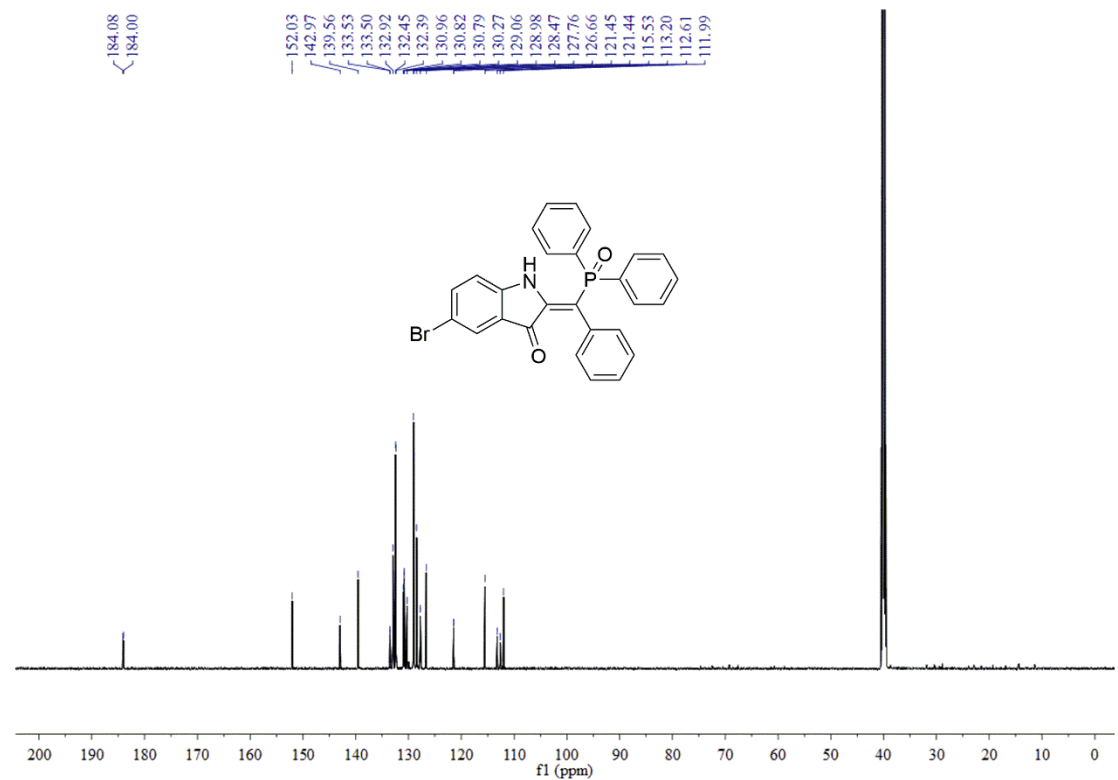

**(Z)-5-bromo-2-((diphenylphosphoryl)(phenyl)methylene)indolin-3-one (4b):  $^{31}\text{P}$  NMR**

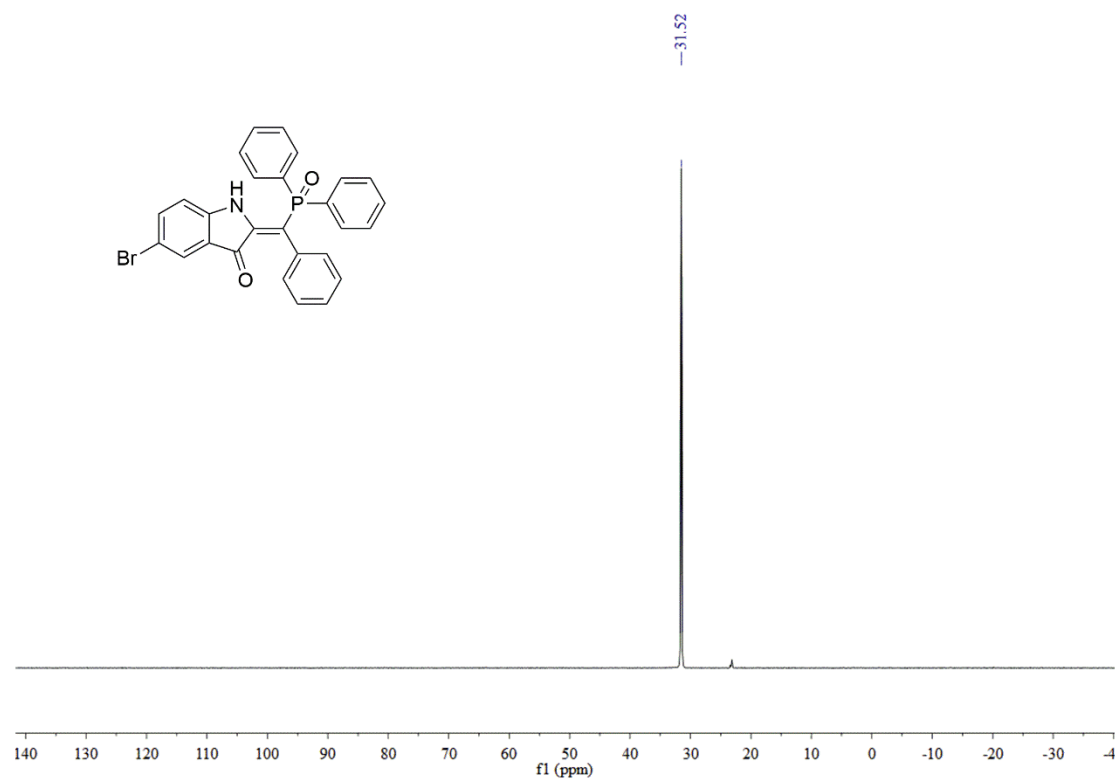

**(Z)-2-((di-p-tolylphosphoryl)(phenyl)methylene)indolin-3-one (4d):  $^1\text{H}$  NMR**

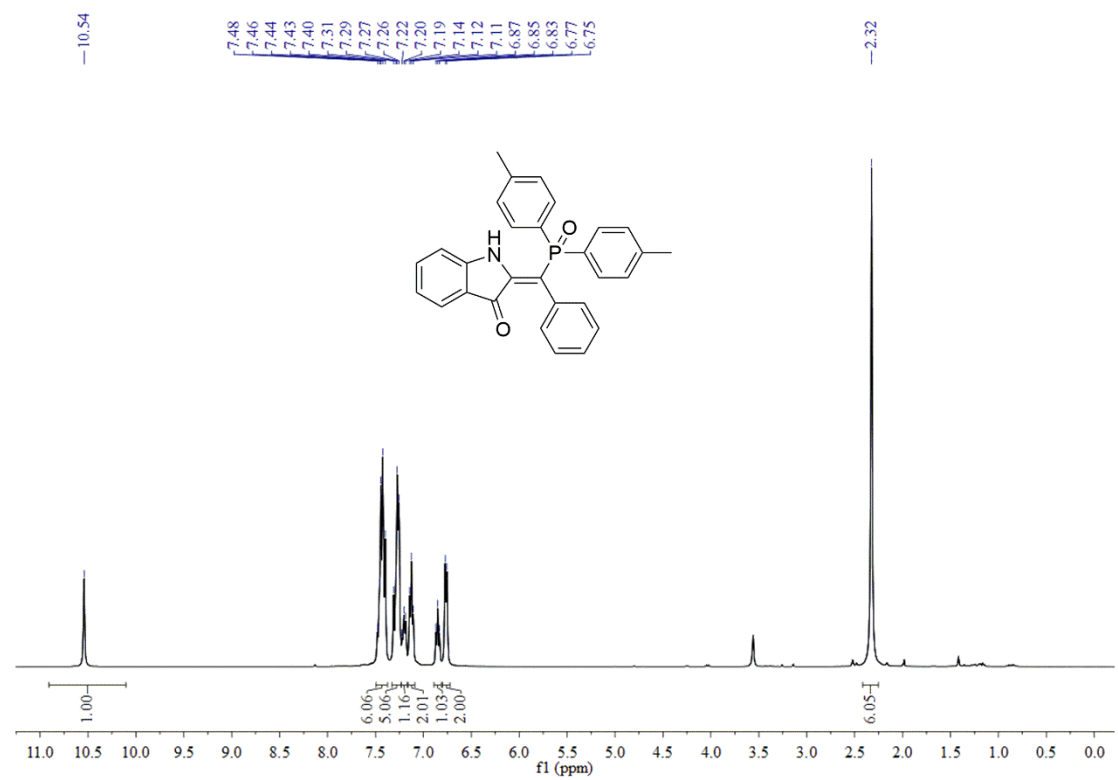

**(Z)-2-((di-p-tolylphosphoryl)(phenyl)methylene)indolin-3-one (4d): <sup>13</sup>C NMR**

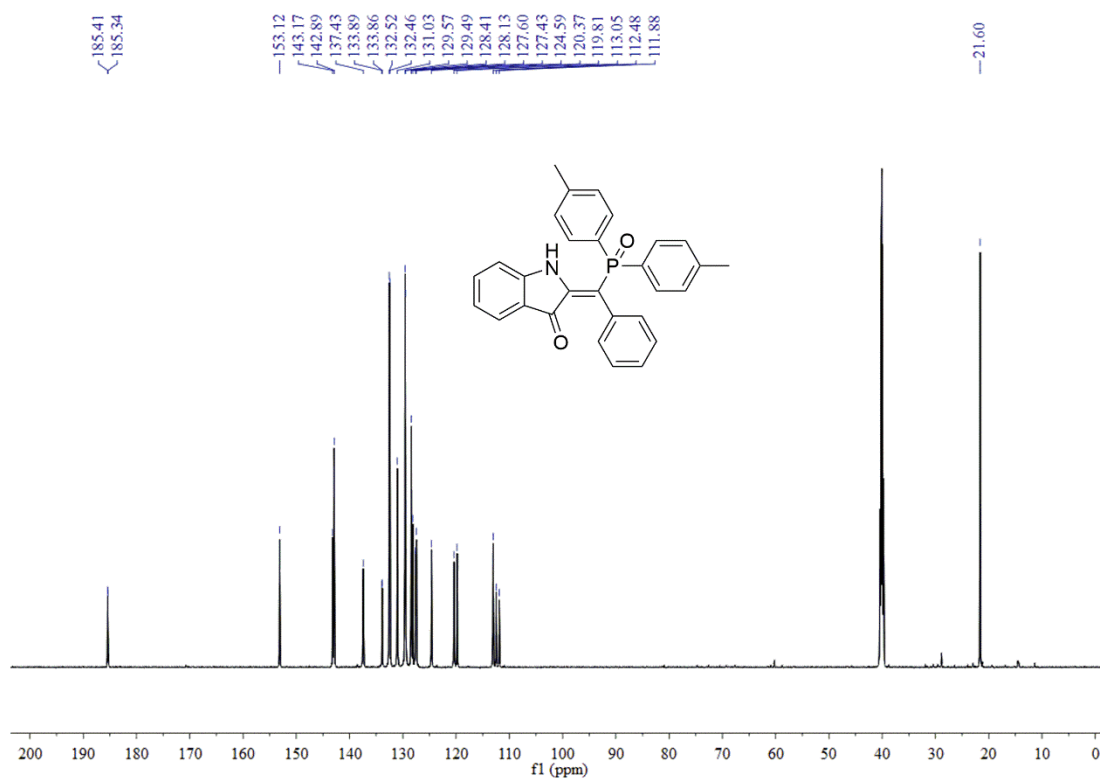

**(Z)-2-((di-p-tolylphosphoryl)(phenyl)methylene)indolin-3-one (4d): <sup>31</sup>P NMR**

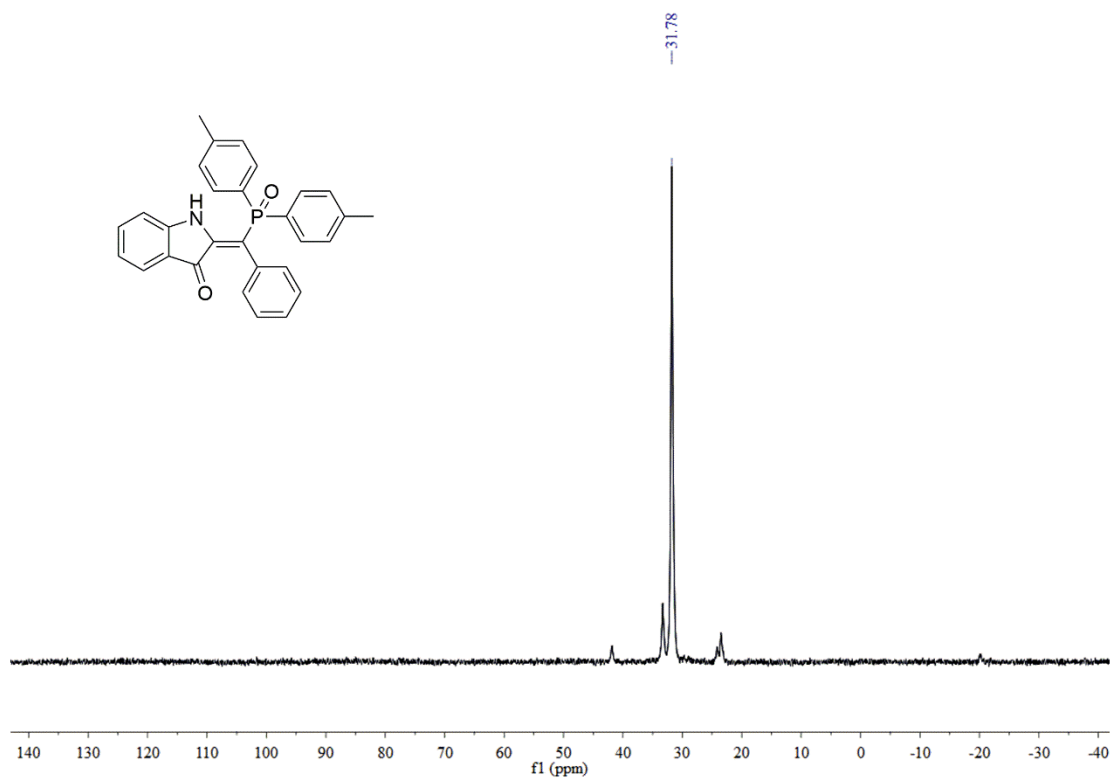



**(Z)-2-((bis(4-methoxyphenyl)phosphoryl)(phenyl)methylene)indolin-3-one (4e): <sup>1</sup>H NMR**

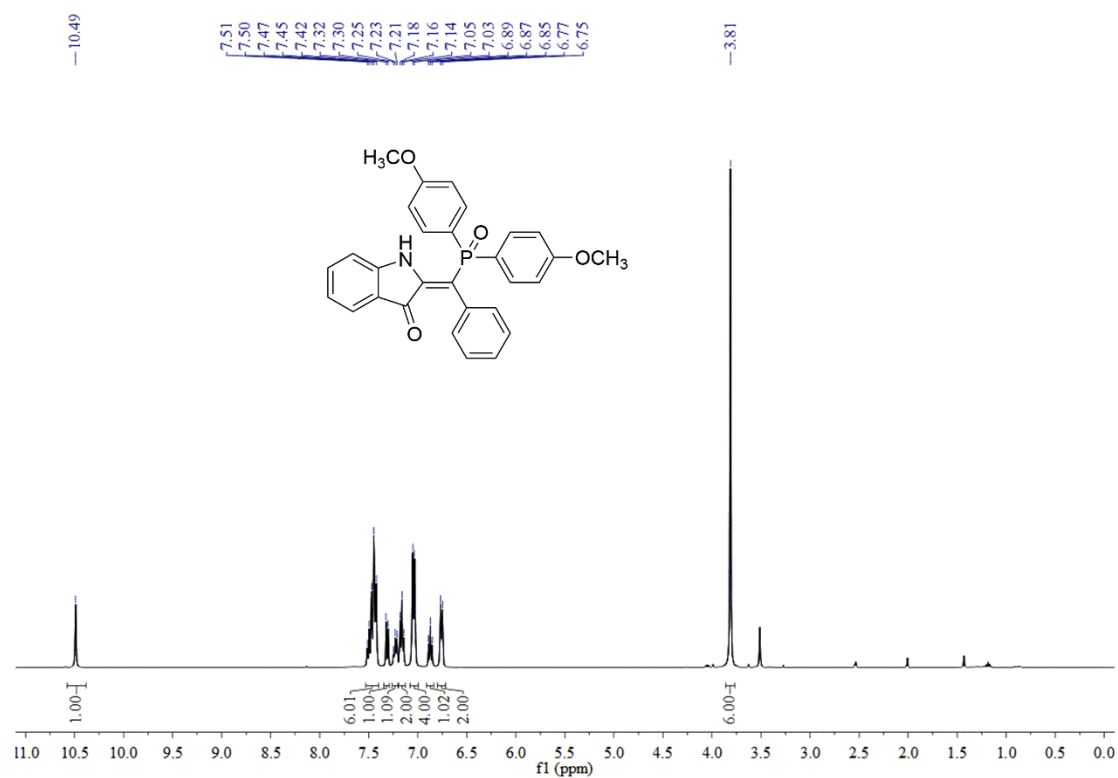

**(Z)-2-((bis(4-methoxyphenyl)phosphoryl)(phenyl)methylene)indolin-3-one (4e): <sup>13</sup>C NMR**

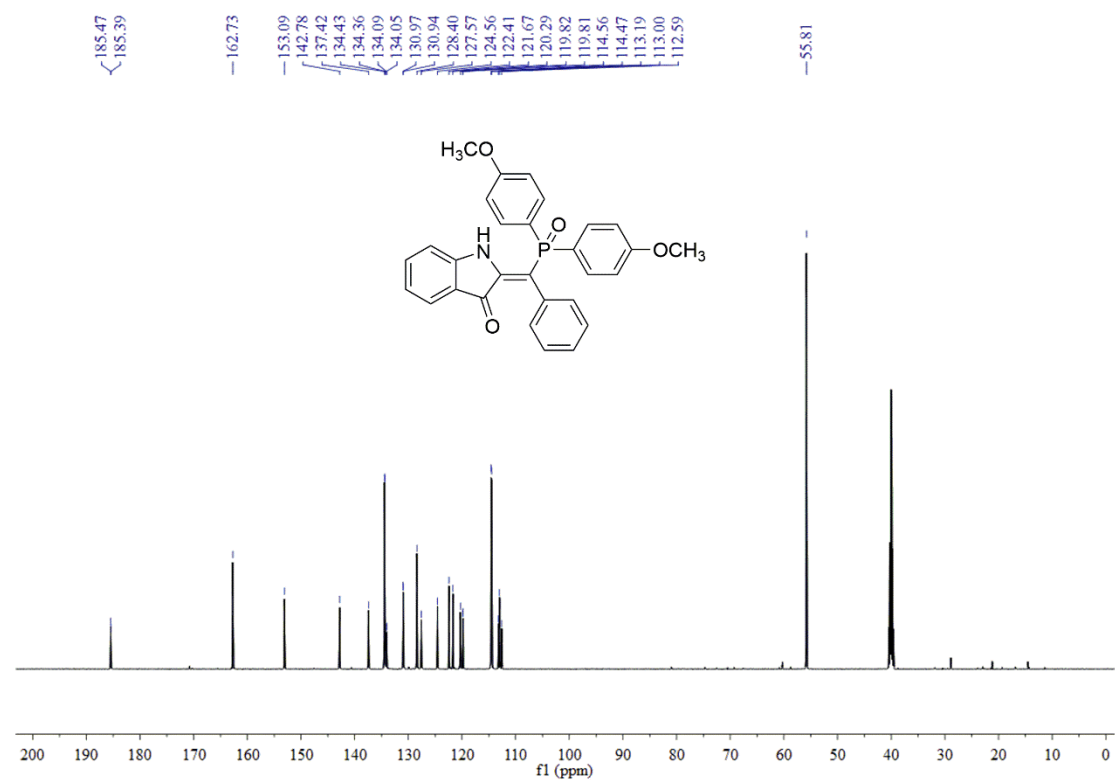

**(Z)-2-((bis(4-methoxyphenyl)phosphoryl)(phenyl)methylene)indolin-3-one (4e): <sup>31</sup>P NMR**

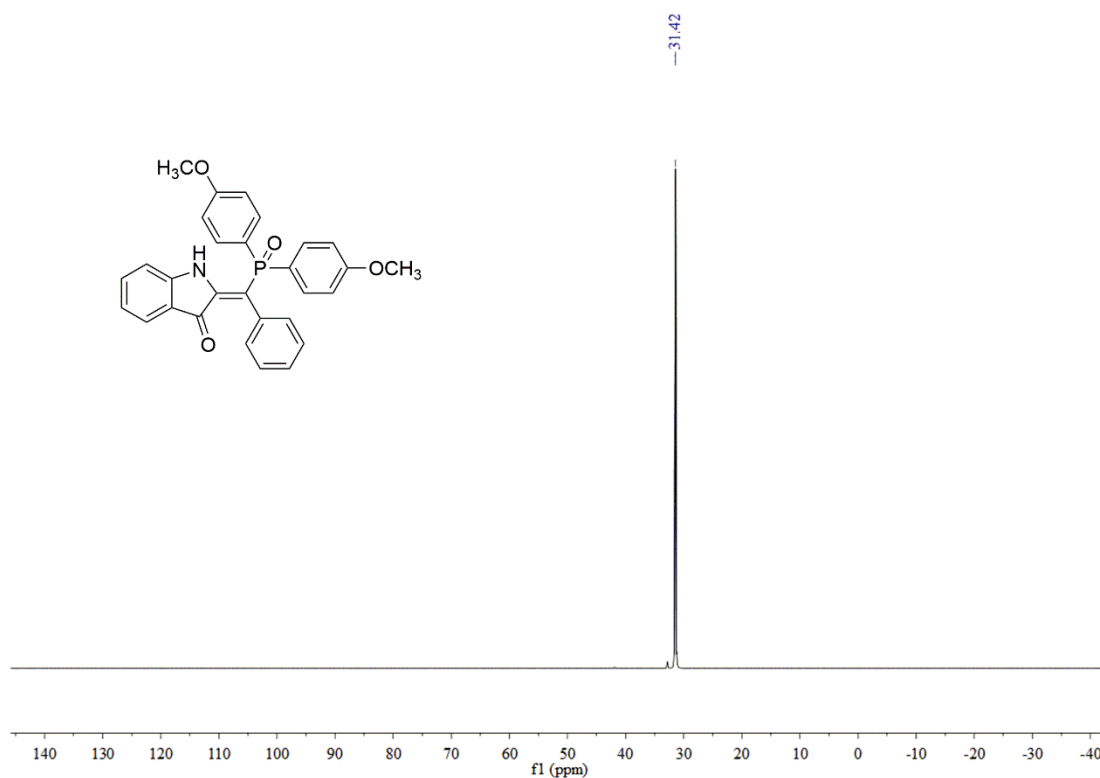

**(Z)-2-((bis(4-chlorophenyl)phosphoryl)(phenyl)methylene)indolin-3-one (4f): <sup>1</sup>H NMR**

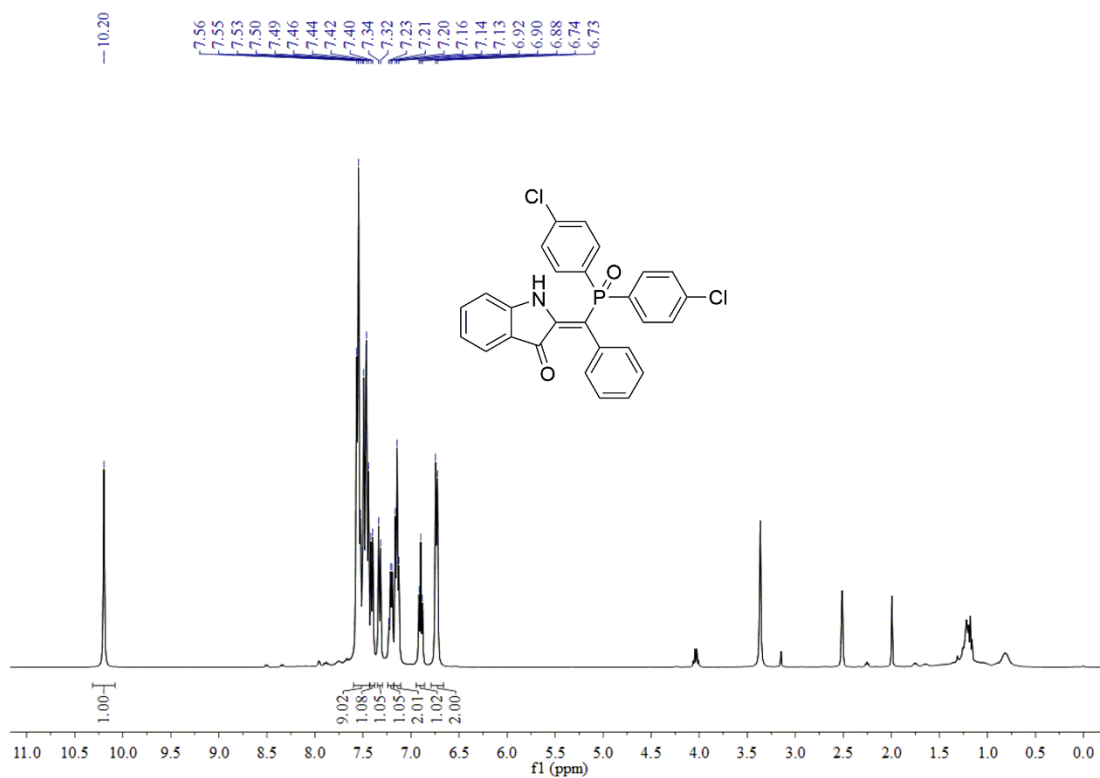

**(Z)-2-((bis(4-chlorophenyl)phosphoryl)(phenyl)methylene)indolin-3-one (4f): <sup>13</sup>C NMR**

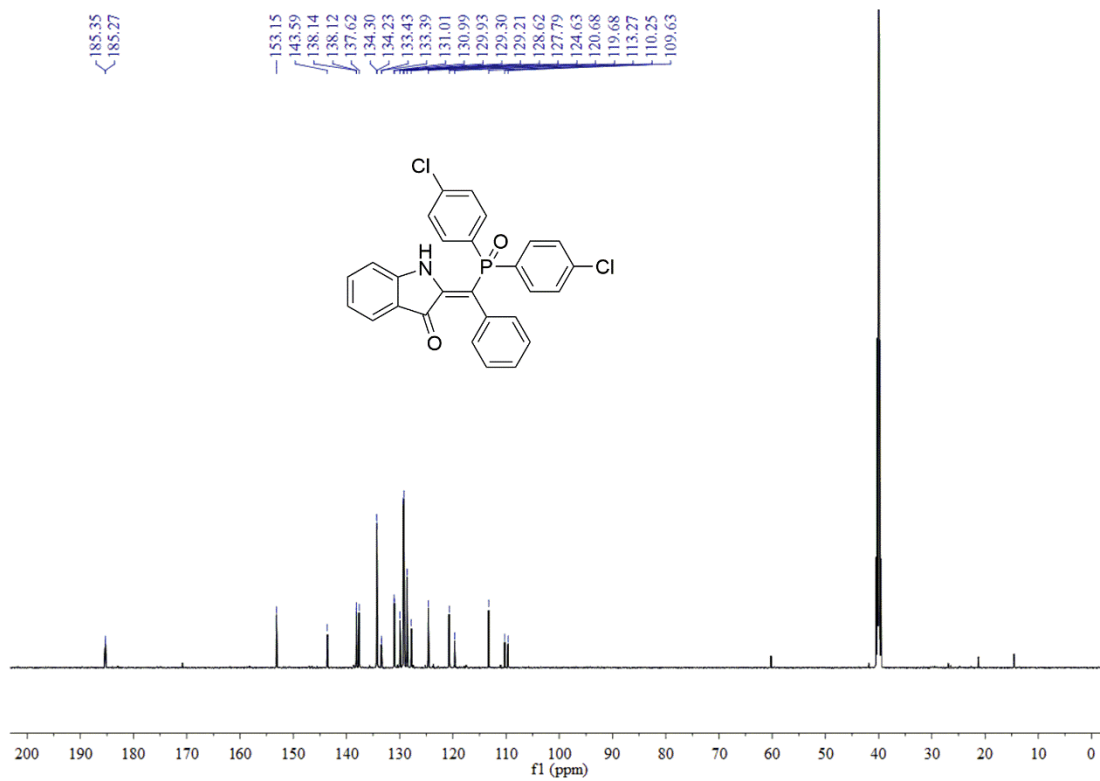

**(Z)-2-((bis(4-chlorophenyl)phosphoryl)(phenyl)methylene)indolin-3-one (4f): <sup>31</sup>P NMR**

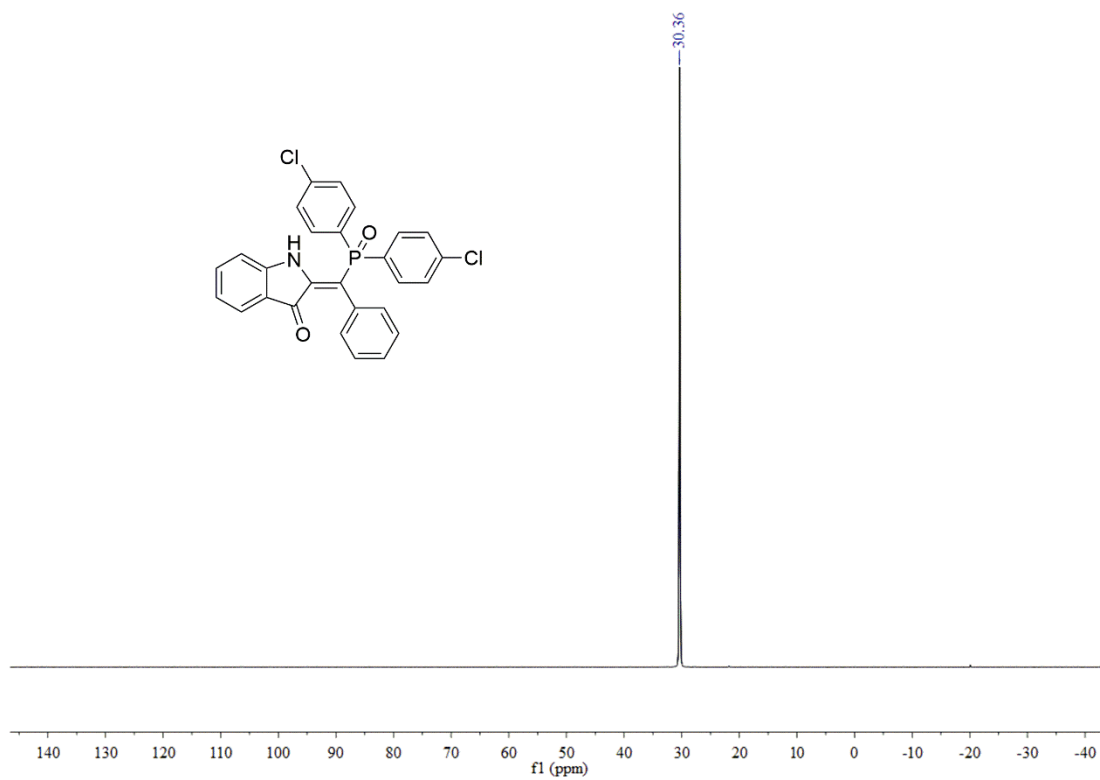

**(Z)-2-((bis(3,5-dimethylphenyl)phosphoryl)(phenyl)methylene)indolin-3-one (4g): <sup>1</sup>H NMR**

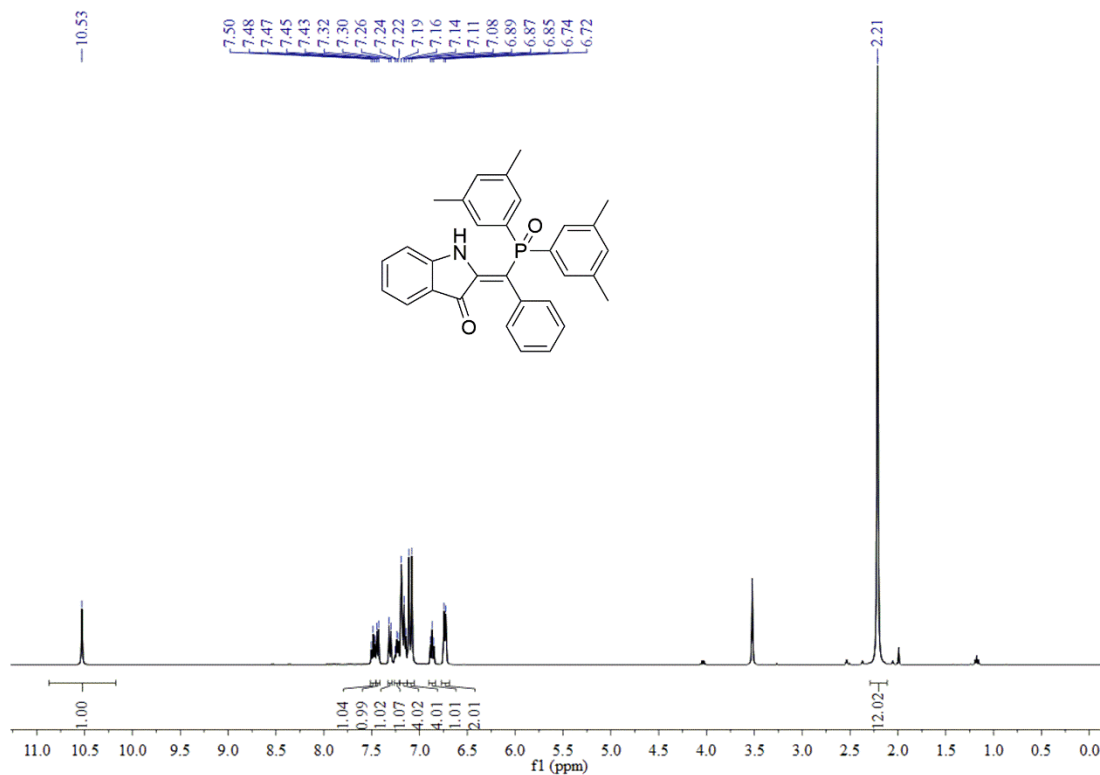

**(Z)-2-((bis(3,5-dimethylphenyl)phosphoryl)(phenyl)methylene)indolin-3-one (4g): <sup>13</sup>C NMR**

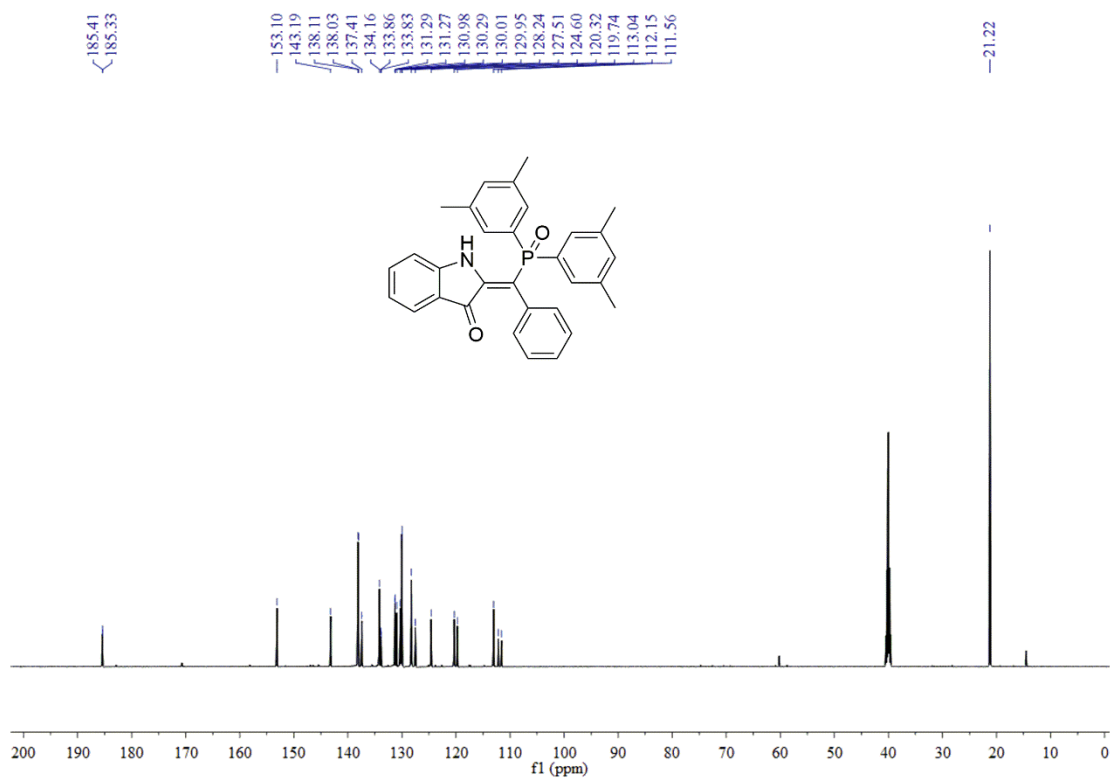

**(Z)-2-((bis(3,5-dimethylphenyl)phosphoryl)(phenyl)methylene)indolin-3-one (4g): <sup>31</sup>P NMR**

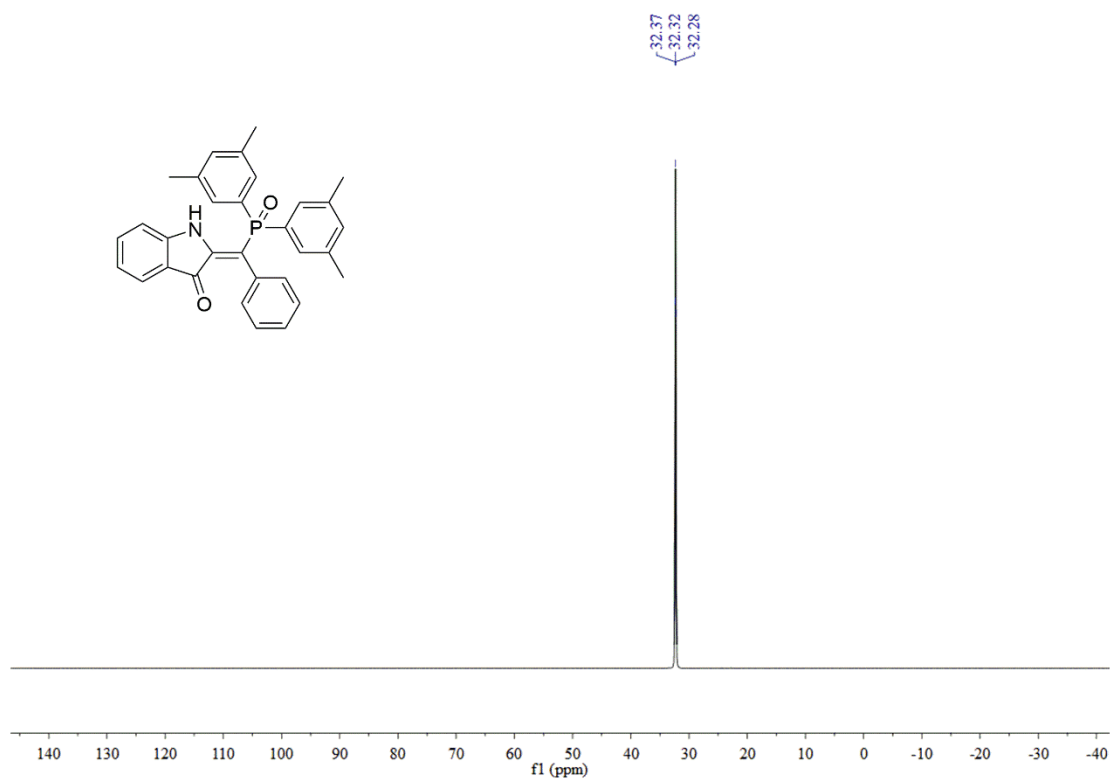

**ethyl (Z)-((3-oxindolin-2-ylidene)(phenyl)methyl)(phenyl)phosphinate (4h): <sup>1</sup>H NMR**

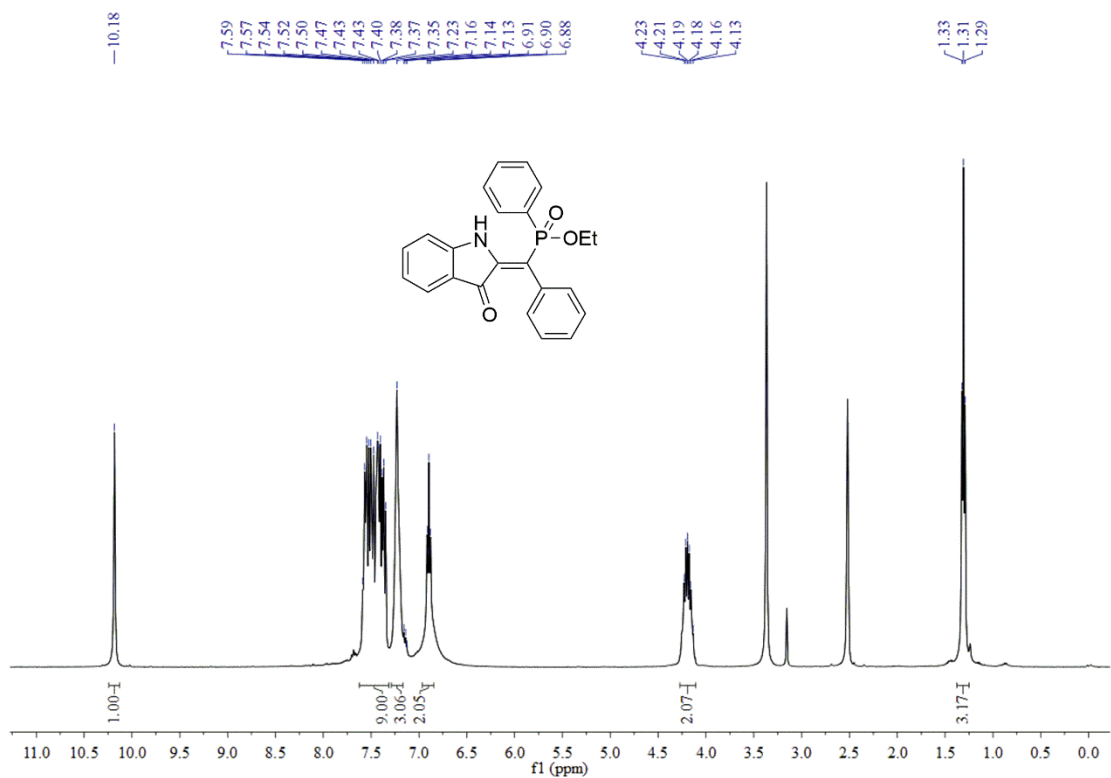

ethyl (Z)-((3-oxoindolin-2-ylidene)(phenyl)methyl)(phenyl)phosphinate (4h): <sup>13</sup>C NMR

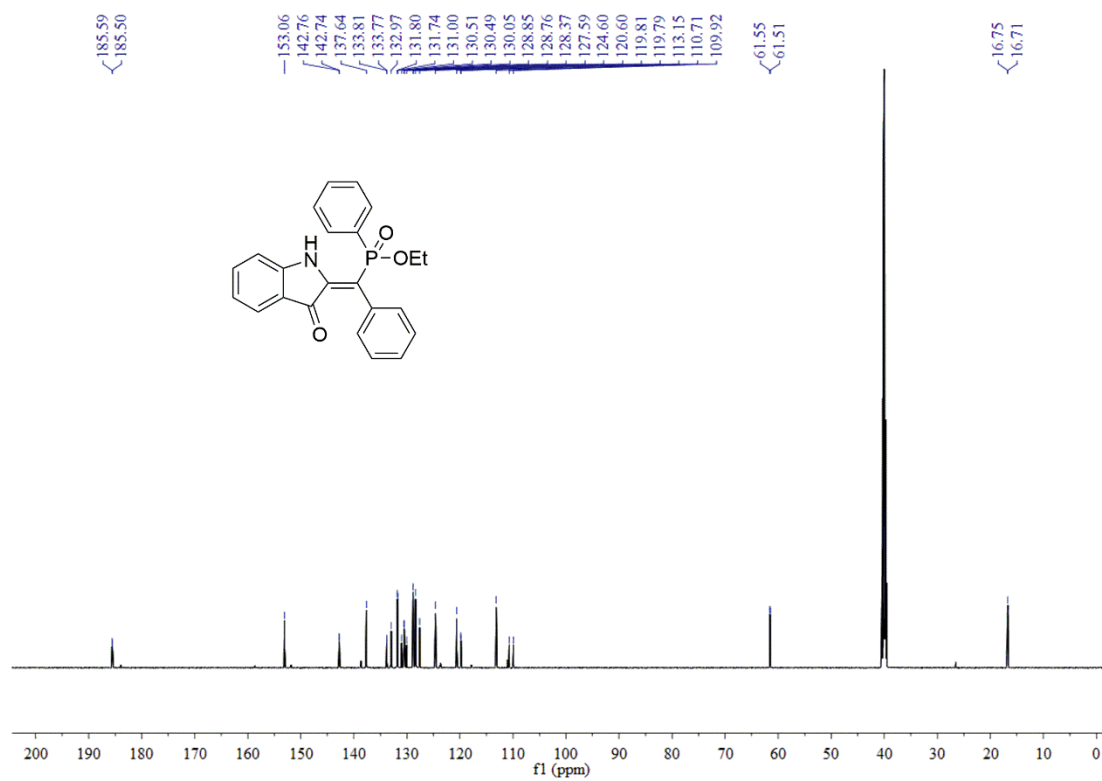

ethyl (Z)-((3-oxoindolin-2-ylidene)(phenyl)methyl)(phenyl)phosphinate (4h): <sup>31</sup>P NMR

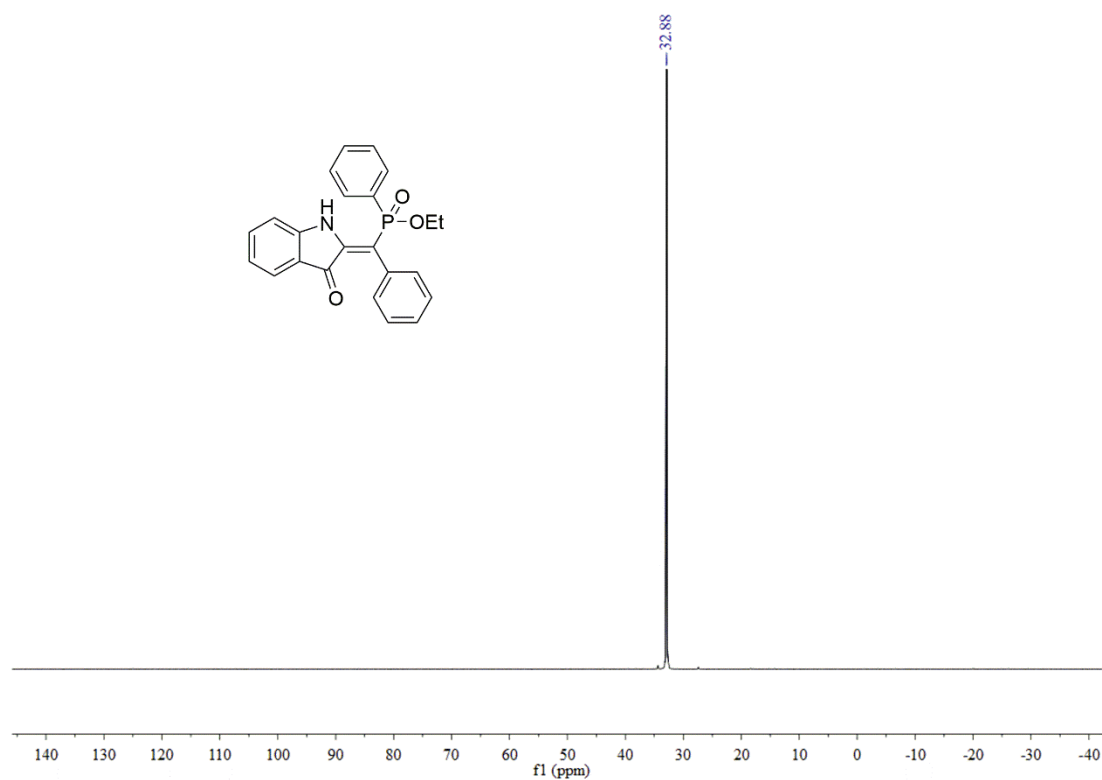

**(Z)-2-((6-oxidodibenzo[*c,e*][1,2]oxaphosphinin-6-yl)(phenyl)methylene)indolin-3-one (4i): <sup>1</sup>H NMR**

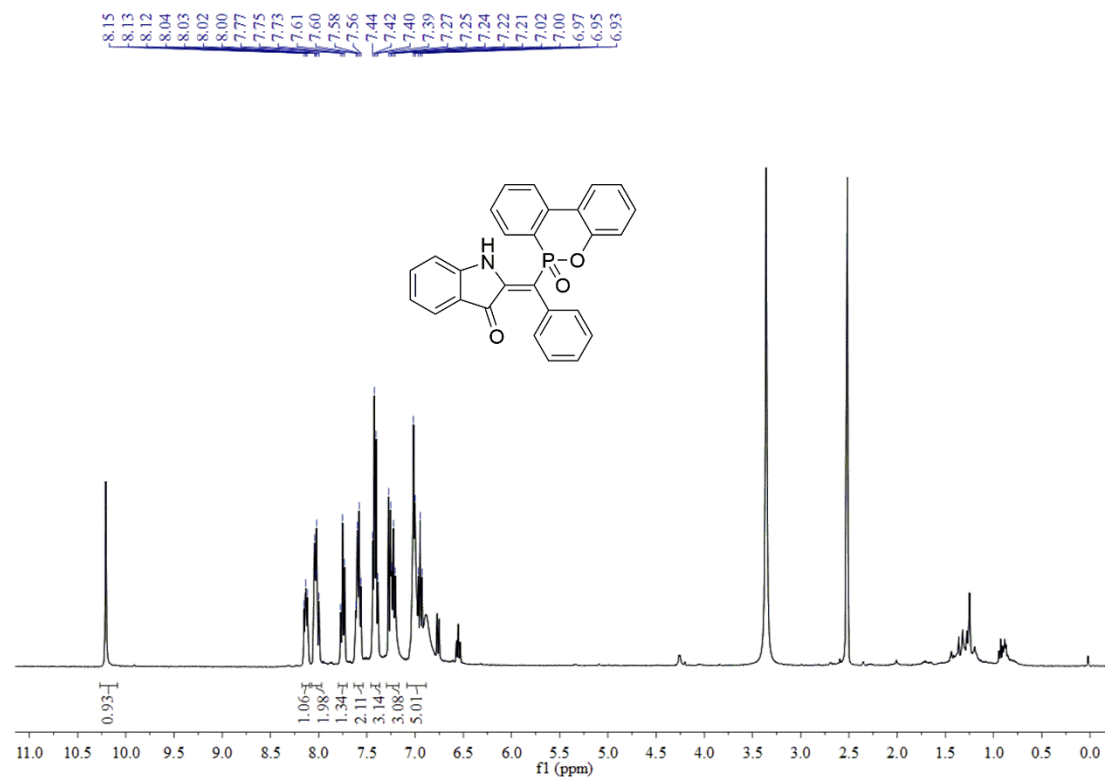

**(Z)-2-((6-oxidodibenzo[*c,e*][1,2]oxaphosphinin-6-yl)(phenyl)methylene)indolin-3-one (4i): <sup>13</sup>C NMR**

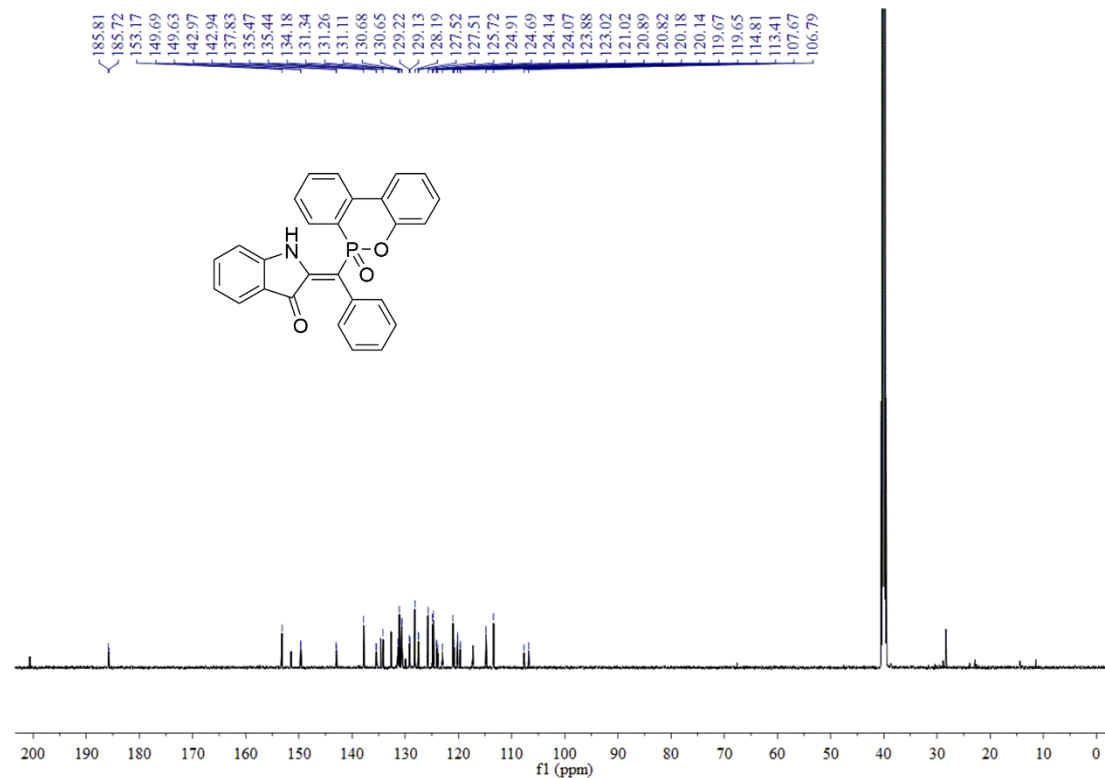

**(Z)-2-((6-oxidodibenzo[*c,e*][1,2]oxaphosphinin-6-yl)(phenyl)methylene)indolin-3-one (4i): <sup>31</sup>P NMR**

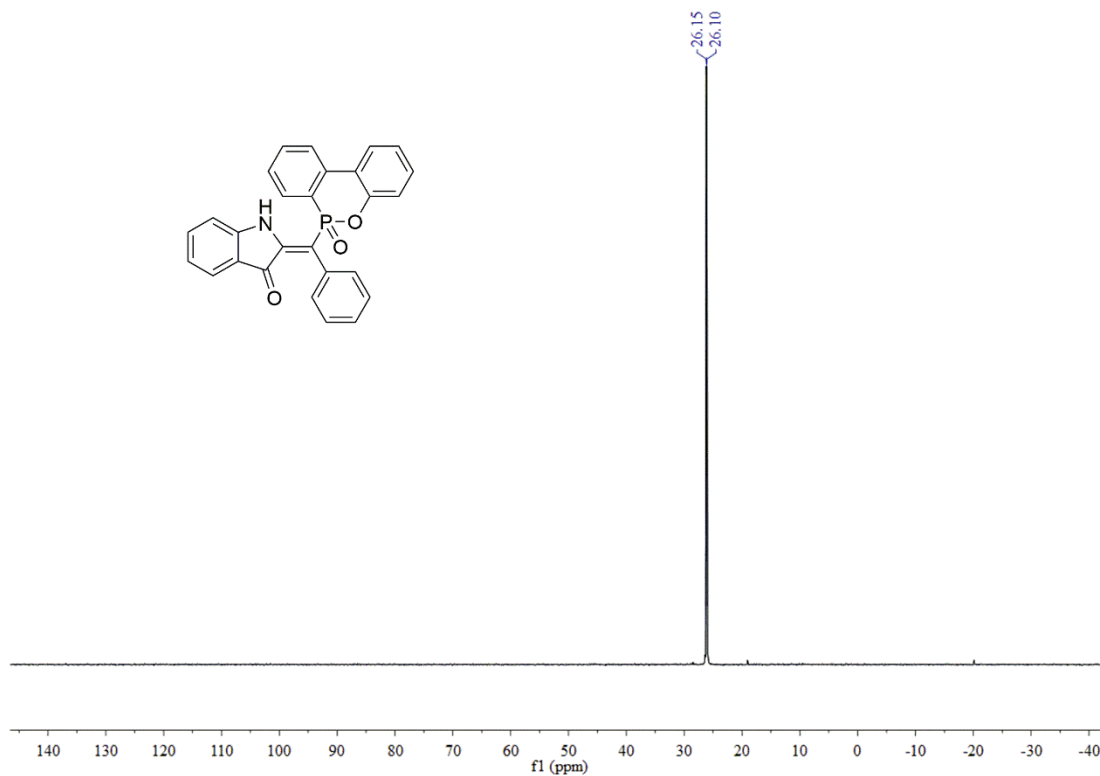

**1-(2-aminophenyl)-3-(diphenylphosphoryl)-3-phenylpropan-1-one (5a): <sup>1</sup>H NMR**

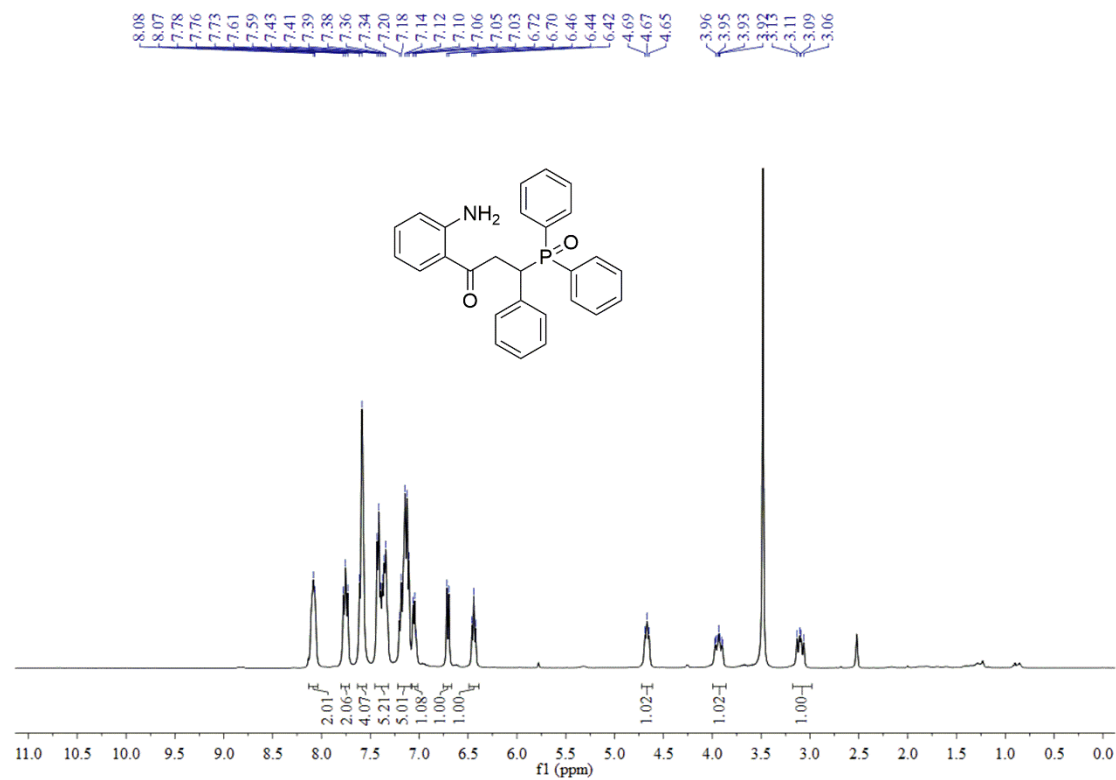



**1-(2-aminophenyl)-3-(diphenylphosphoryl)-3-phenylpropan-1-one (5a): <sup>13</sup>C NMR**

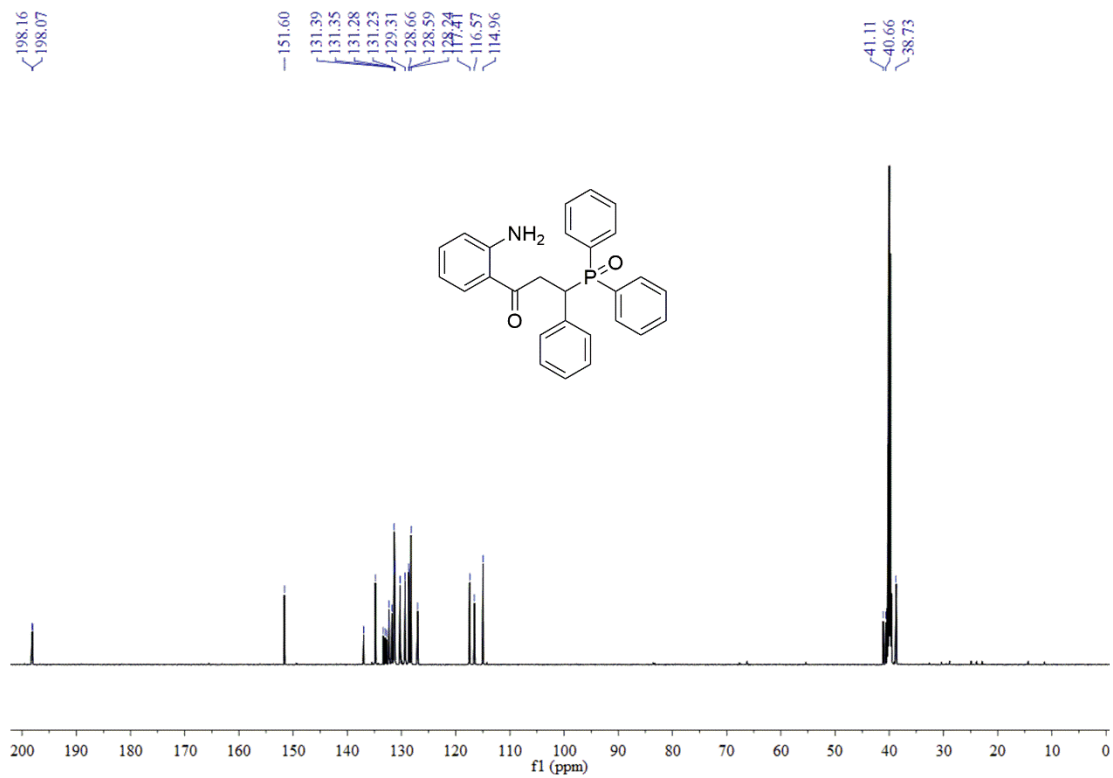

**1-(2-aminophenyl)-3-(diphenylphosphoryl)-3-phenylpropan-1-one (5a): <sup>31</sup>P NMR**

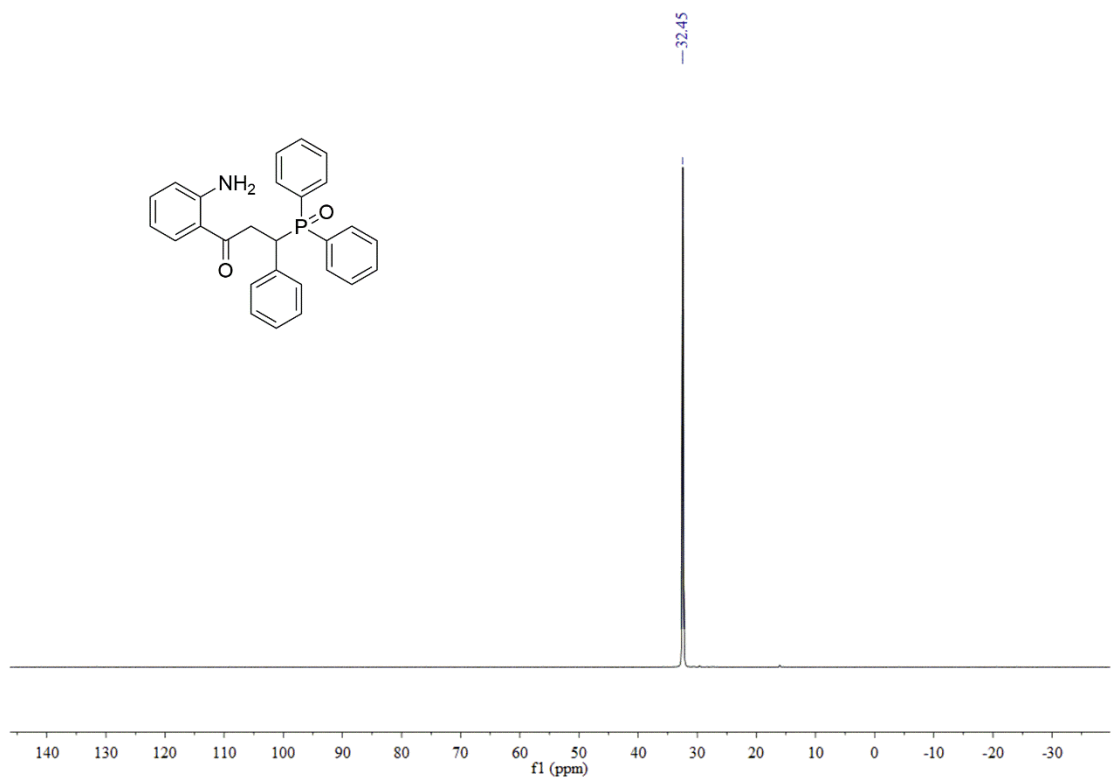

Supplement: d4ob00594e1.pdf [file d4ob00594e1.pdf]
